# Supplementary material
Source: PubMed Central journal article supplement (PMC10967253)
Supplement: NIHMS1959605-supplement-Supplementary_Information.pdf [file NIHMS1959605-supplement-Supplementary_Information.pdf]

12 **1. Supplementary Information:**13 **A. PDF Files**

14

| Item                             | Present? | Filename                                                              | A brief, numerical description of file contents.  |
|----------------------------------|----------|-----------------------------------------------------------------------|---------------------------------------------------|
| <b>Supplementary Information</b> | Yes      | Supplementary_Information.pdf                                         | Supplementary Figures 1-2 and Supplementary Note. |
| <b>Reporting Summary</b>         | Yes      | /tmp/zip_19502_1684970254/Resubmit 2/nr-reporting-summary_updated.pdf |                                                   |
| <b>Peer Review Information</b>   | Yes      | PRFile_Horwitz.pdf                                                    |                                                   |

15

16 **B. Additional Supplementary Files**

17

| Type                | Number                   | Filename                        | Legend or Descriptive Caption                                                                                                                                                                                                                                                                                                                                                                                                                         |
|---------------------|--------------------------|---------------------------------|-------------------------------------------------------------------------------------------------------------------------------------------------------------------------------------------------------------------------------------------------------------------------------------------------------------------------------------------------------------------------------------------------------------------------------------------------------|
| Supplementary Table | Supplementary Tables 1-6 | Supplementary_Tables_S1-S6.xlsx | <p><b>Supplementary Table 1:</b> Studies on continuous traits included in the meta-analysis.</p> <p><b>Supplementary Table 2:</b> Studies on binary traits included in the meta-analysis, in addition to a small number of excluded studies for excluded traits (see main text).</p> <p><b>Supplementary Table 3:</b> Excluded studies and reasons for exclusion.</p> <p><b>Supplementary Table 4:</b> Summary statistics and zero order--as well</p> |

|                     |                       |                                                                      |                                                                                                                                                                                                                                                                                                                                                                                                                                                                                                                                                |
|---------------------|-----------------------|----------------------------------------------------------------------|------------------------------------------------------------------------------------------------------------------------------------------------------------------------------------------------------------------------------------------------------------------------------------------------------------------------------------------------------------------------------------------------------------------------------------------------------------------------------------------------------------------------------------------------|
|                     |                       |                                                                      | <p>as partial--correlations between inferred partners in the UK Biobank; additionally, differences between zero order and partial correlation for the same trait are given for each correlation type.</p> <p><b>Supplementary Table 5:</b> Two-sided tests comparing continuous, Fisher-transformed partner correlations within-trait across non-overlapping participant pairs in our UK Biobank sample and that of Yengo et al. (2018).</p> <p><b>Supplementary Table 6:</b> Combinations of search terms used for the literature review.</p> |
| Supplementary Table | Supplementary Table 7 | /tmp/zip_19502_1684970254/Re submit 2/PRISMA_checklist.docx          | PRISMA Checklist                                                                                                                                                                                                                                                                                                                                                                                                                                                                                                                               |
| Supplementary Table | Supplementary Table 8 | /tmp/zip_19502_1684970254/Re submit 2/PRISMA_abstract_checklist.docx | PRISMA Abstract Checklist                                                                                                                                                                                                                                                                                                                                                                                                                                                                                                                      |

## Table of Contents

|    |          |                                                                                            |
|----|----------|--------------------------------------------------------------------------------------------|
| 1  |          |                                                                                            |
| 2  | <b>1</b> | <b>Supplementary Figures 1a-1v: Forest plots, sorted by year of publication and color-</b> |
| 3  |          | <b>coded by region</b>                                                                     |
| 4  | 1.1.     | <b>Smoking Status Forest Plot ..... 4</b>                                                  |
| 5  | 1.2.     | <b>Smoking Quantity Forest Plot..... 5</b>                                                 |
| 6  | 1.3.     | <b>Extraversion Forest Plot.....6</b>                                                      |
| 7  | 1.4.     | <b>Neuroticism Forest Plot ..... 7</b>                                                     |
| 8  | 1.5.     | <b>Openness Forest Plot..... 8</b>                                                         |
| 9  | 1.6.     | <b>Drinking Quantity Forest Plot ..... 9</b>                                               |
| 10 | 1.7.     | <b>Agreeableness Forest Plot..... 10</b>                                                   |
| 11 | 1.8.     | <b>Waist-to-Hip Ratio Forest Plot ..... 11</b>                                             |
| 12 | 1.9.     | <b>Depression Forest Plot ..... 12</b>                                                     |
| 13 | 1.10.    | <b>Diabetes Forest Plot ..... 13</b>                                                       |
| 14 | 1.11.    | <b>Generalized Anxiety Forest Plot ..... 14</b>                                            |
| 15 | 1.12.    | <b>Political Values Forest Plot..... 15</b>                                                |
| 16 | 1.13.    | <b>Religiosity Forest Plot ..... 16</b>                                                    |
| 17 | 1.14.    | <b>Smoking Initiation Forest Plot .....17</b>                                              |
| 18 | 1.15.    | <b>Smoking Cessation Forest Plot..... 18</b>                                               |
| 19 | 1.16.    | <b>Problematic Alcohol Use Forest Plot .....19</b>                                         |
| 20 | 1.17.    | <b>Substance Use Disorder Forest Plot..... 20</b>                                          |
| 21 | 1.18.    | <b>Body Mass Index Forest Plot..... 21</b>                                                 |
| 22 | 1.19.    | <b>Height Forest Plot..... 22</b>                                                          |
| 23 | 1.20.    | <b>Educational Attainment Forest Plot.....23</b>                                           |

|    |                                                            |           |
|----|------------------------------------------------------------|-----------|
| 24 | <b>1.21. Intelligence Quotient Score Forest Plot.....</b>  | <b>24</b> |
| 25 | <b>1.22. Conscientiousness Forest Plot .....</b>           | <b>25</b> |
| 26 | <b>2 Supplementary Figure 2: PRISMA Flow Diagrams</b>      |           |
| 27 | <b>2.1. Substance Use Disorder Flow Diagram.....</b>       | <b>26</b> |
| 28 | <b>2.2. Problematic Alcohol Use Flow Diagram .....</b>     | <b>27</b> |
| 29 | <b>2.3. Drinking Quantity Flow Diagram .....</b>           | <b>28</b> |
| 30 | <b>2.4. Waist-to-Hip Ratio Flow Diagram.....</b>           | <b>29</b> |
| 31 | <b>2.5. Height Flow Diagram.....</b>                       | <b>30</b> |
| 32 | <b>2.6. Body Mass Index Flow Diagram.....</b>              | <b>31</b> |
| 33 | <b>2.7. Extraversion Flow Diagram .....</b>                | <b>32</b> |
| 34 | <b>2.8. Neuroticism Flow Diagram .....</b>                 | <b>33</b> |
| 35 | <b>2.9. Openness Flow Diagram.....</b>                     | <b>34</b> |
| 36 | <b>2.10. Conscientiousness Flow Diagram .....</b>          | <b>35</b> |
| 37 | <b>2.11. Agreeableness Flow Diagram .....</b>              | <b>36</b> |
| 38 | <b>2.12. Intelligence Quotient Score Flow Diagram.....</b> | <b>37</b> |
| 39 | <b>2.13. Diabetes Flow Diagram.....</b>                    | <b>38</b> |
| 40 | <b>2.14. Educational Attainment Flow Diagram .....</b>     | <b>39</b> |
| 41 | <b>2.15. Smoking Status Flow Diagram.....</b>              | <b>40</b> |
| 42 | <b>2.16. Smoking Initiation Flow Diagram .....</b>         | <b>41</b> |
| 43 | <b>2.17. Smoking Cessation Flow Diagram.....</b>           | <b>42</b> |
| 44 | <b>2.18. Smoking Quantity Flow Diagram.....</b>            | <b>43</b> |
| 45 | <b>2.19. Religiosity Flow Diagram .....</b>                | <b>44</b> |
| 46 | <b>2.20. Political Values Flow Diagram.....</b>            | <b>45</b> |

|    |                                                                                         |              |
|----|-----------------------------------------------------------------------------------------|--------------|
| 47 | <b>2.21. Depression Flow Diagram .....</b>                                              | <b>46</b>    |
| 48 | <b>2.22. Generalized Anxiety Flow Diagram .....</b>                                     | <b>47</b>    |
| 49 | <b>3 Supplementary Note</b>                                                             |              |
| 50 | <b>3.1. Trait descriptions for Educational Attainment, Intelligence Quotient Score,</b> |              |
| 51 | <b>Political Values, Religiosity, Problematic Alcohol Use, Drinking Quantity, and</b>   |              |
| 52 | <b>Smoking Cessation .....</b>                                                          | <b>48-49</b> |
| 53 | <b>3.2. Trait descriptions for Smoking Initiation, Smoking Quantity, Smoking</b>        |              |
| 54 | <b>Status, Substance Use Disorder, and Agreeableness.....</b>                           | <b>49-50</b> |
| 55 | <b>3.2. Trait descriptions for Conscientiousness, Extraversion, Neuroticism, and</b>    |              |
| 56 | <b>Openness .....</b>                                                                   | <b>50-51</b> |
| 57 | <b>3.3. Trait descriptions for Body Mass Index, Height, Waist-to-Hip Ratio,</b>         |              |
| 58 | <b>Depression, Diabetes, and Generalized Anxiety .....</b>                              | <b>51-52</b> |
| 59 | <b>4. References .....</b>                                                              | <b>53-74</b> |

## 60 Supplementary Figure 1a

## Smoking Status

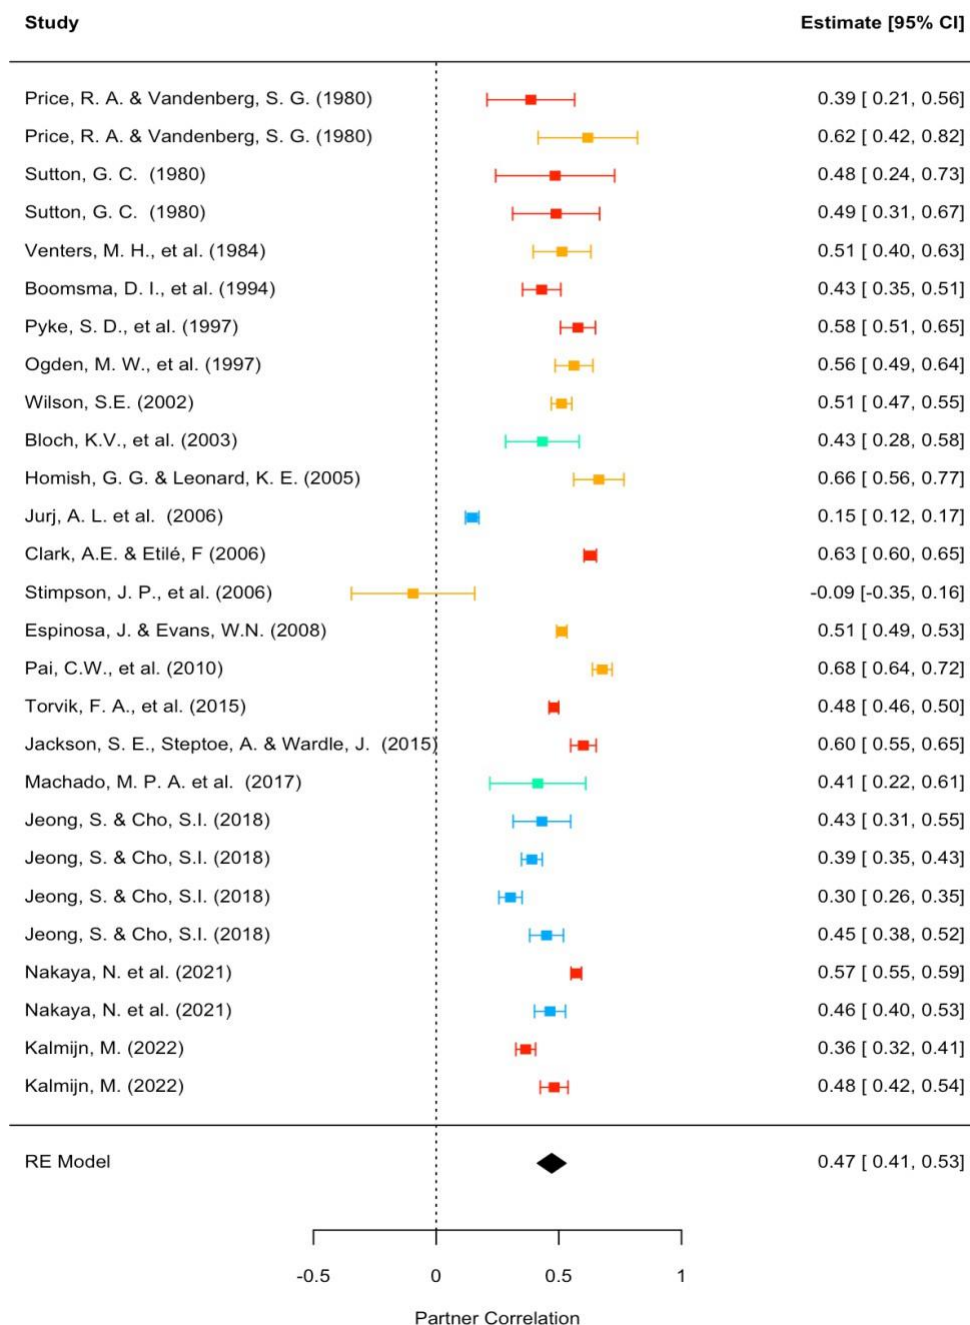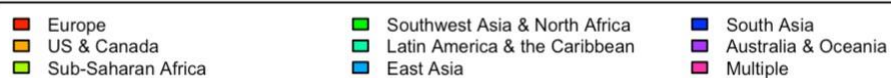

63  
64 **Supplementary Figure 1b**

## Smoking Quantity

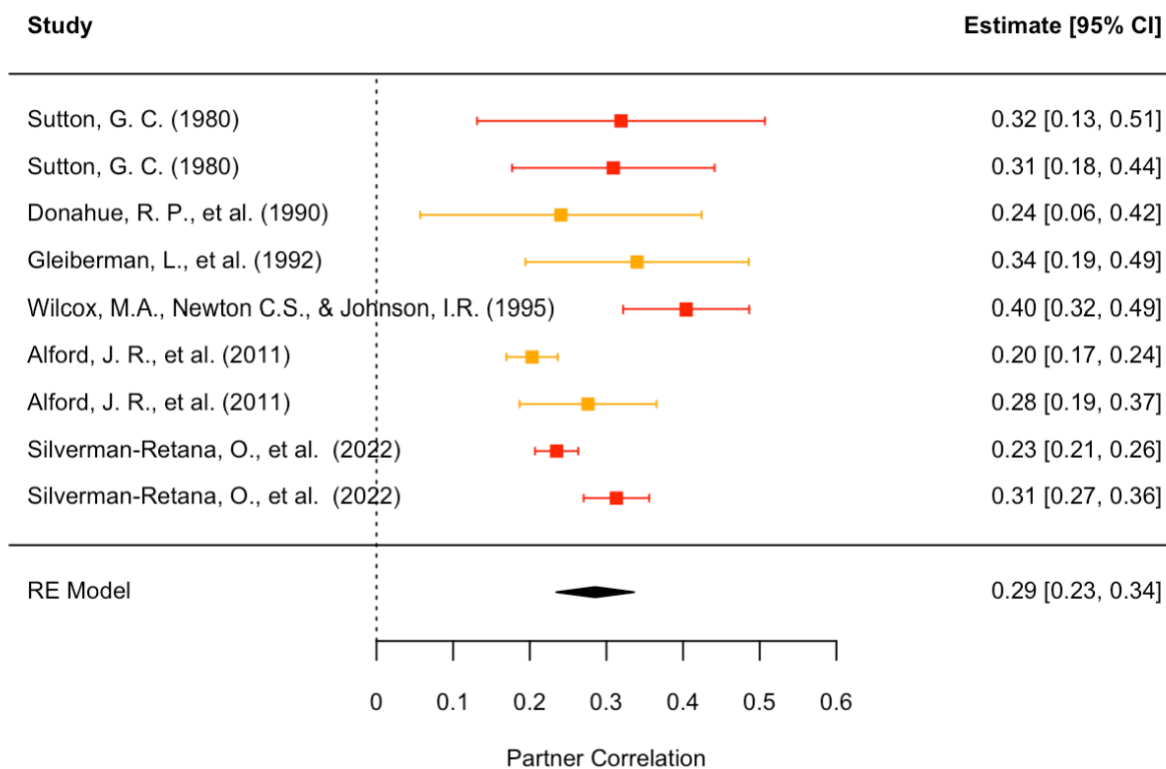

65

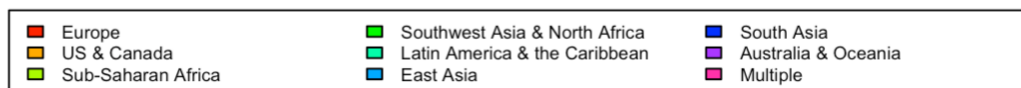

66

67 **Supplementary Figure 1c**

**Extraversion**

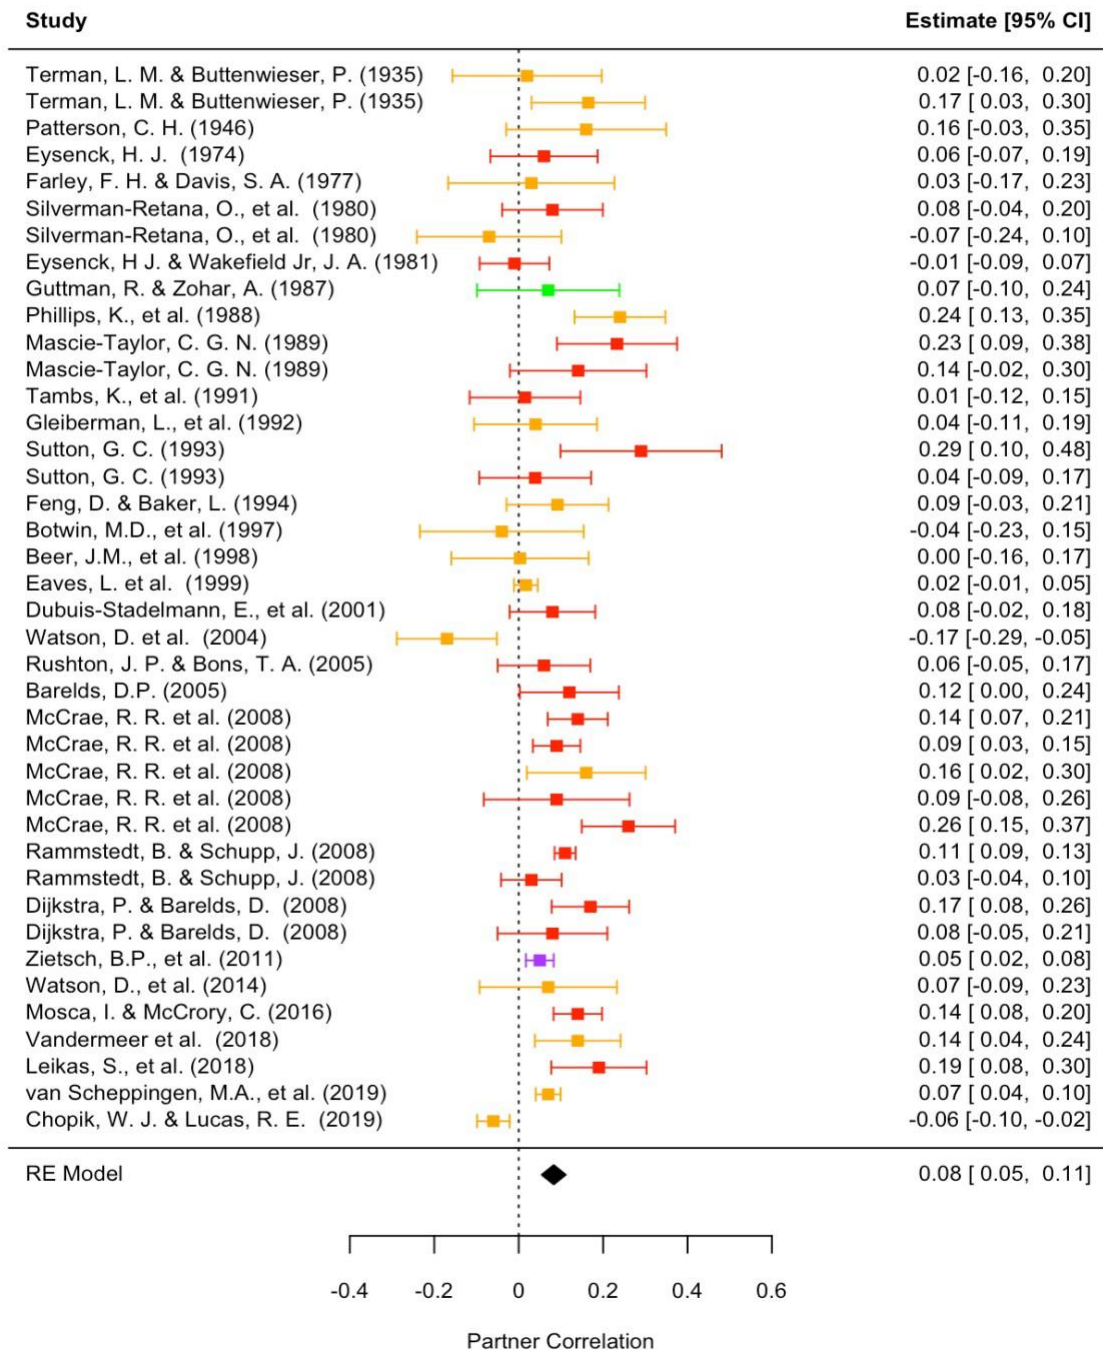

68

69

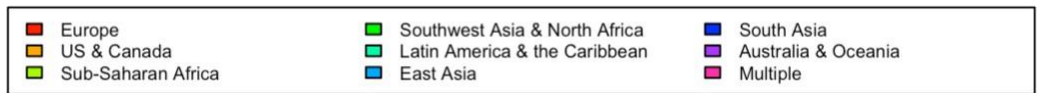



70

## Supplementary Figure 1d

## Neuroticism

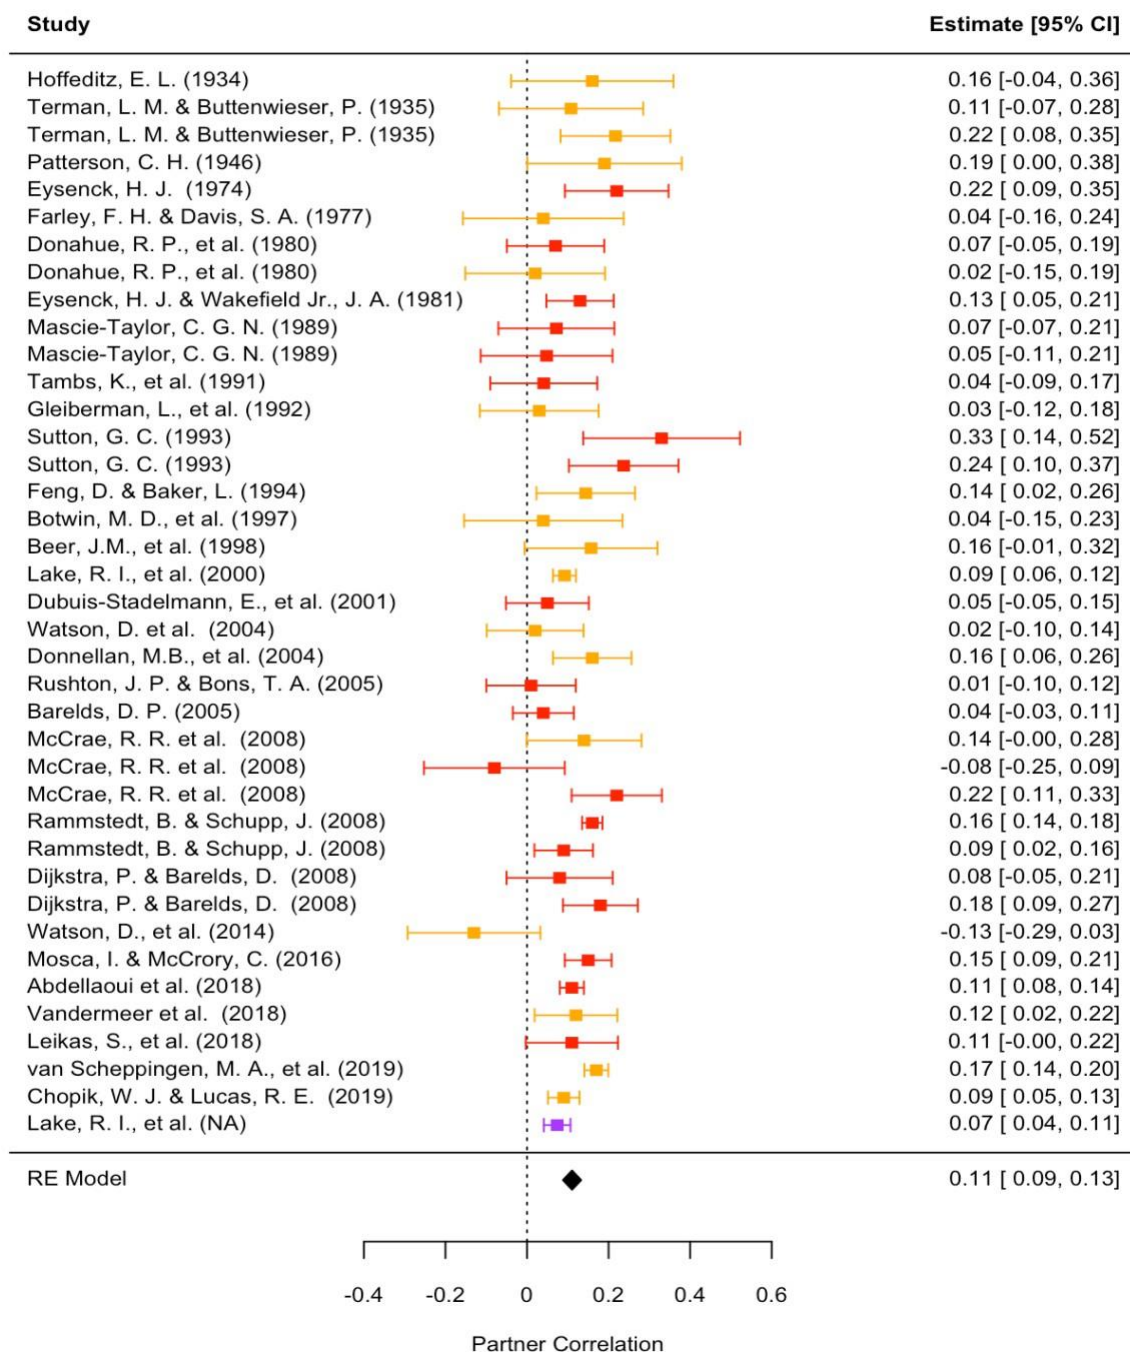

71

72

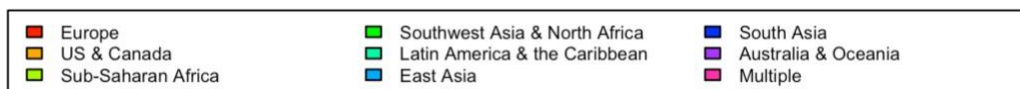

73 **Supplementary Figure 1e**

### Openness

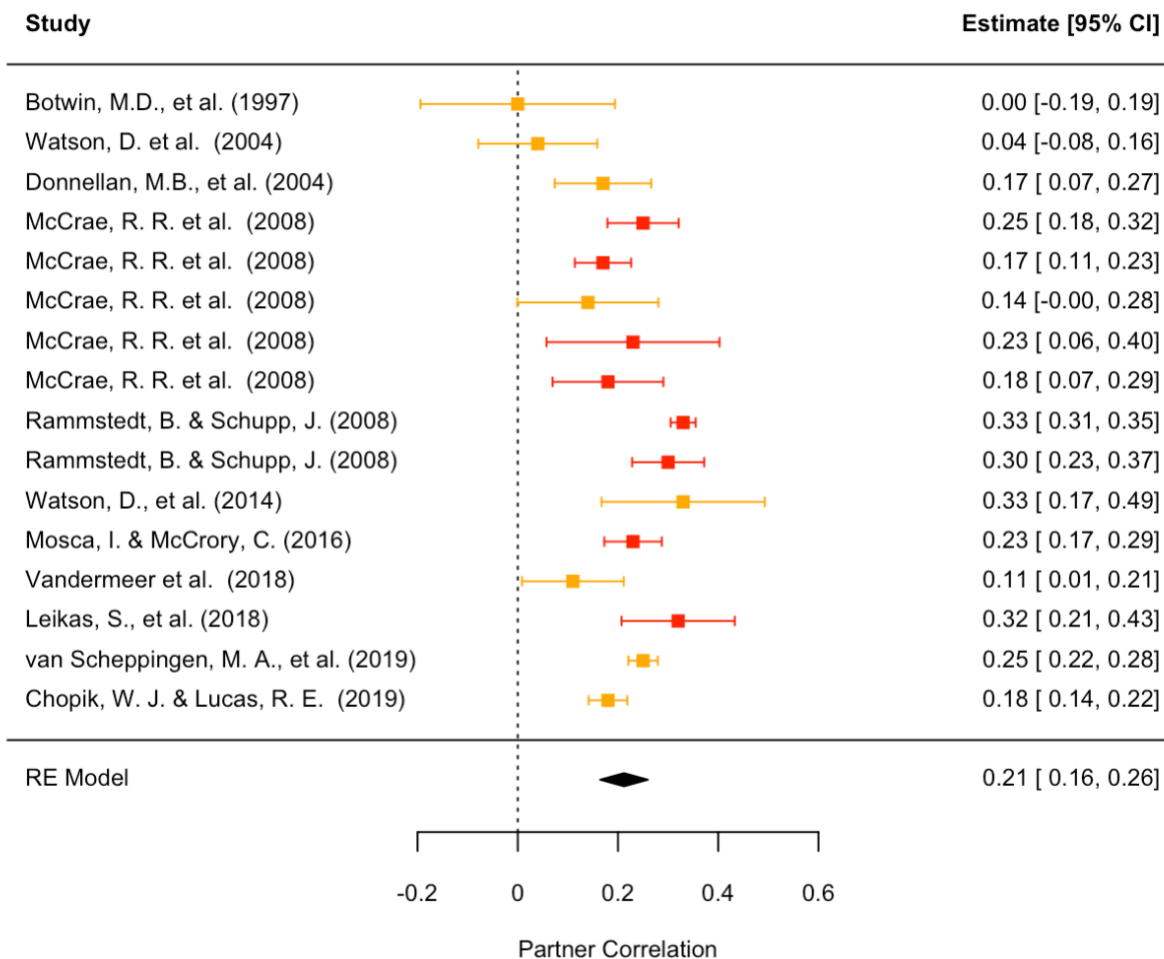

74

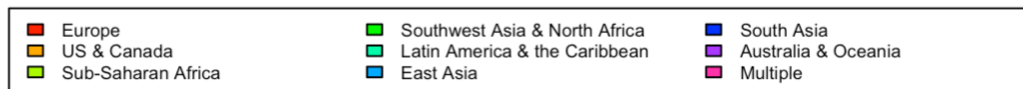

75

76 **Supplementary Figure 1f****Drinking Quantity**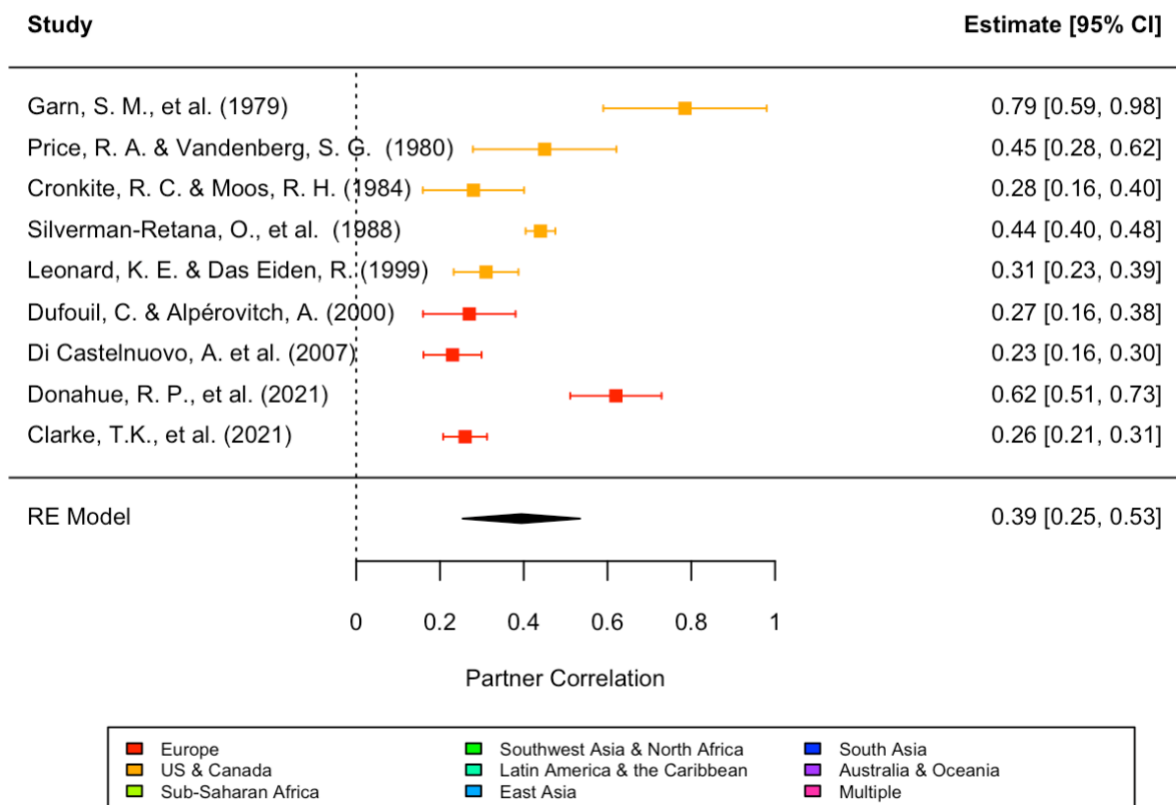

77

78

79 **Supplementary Figure 1g**

### Agreeableness

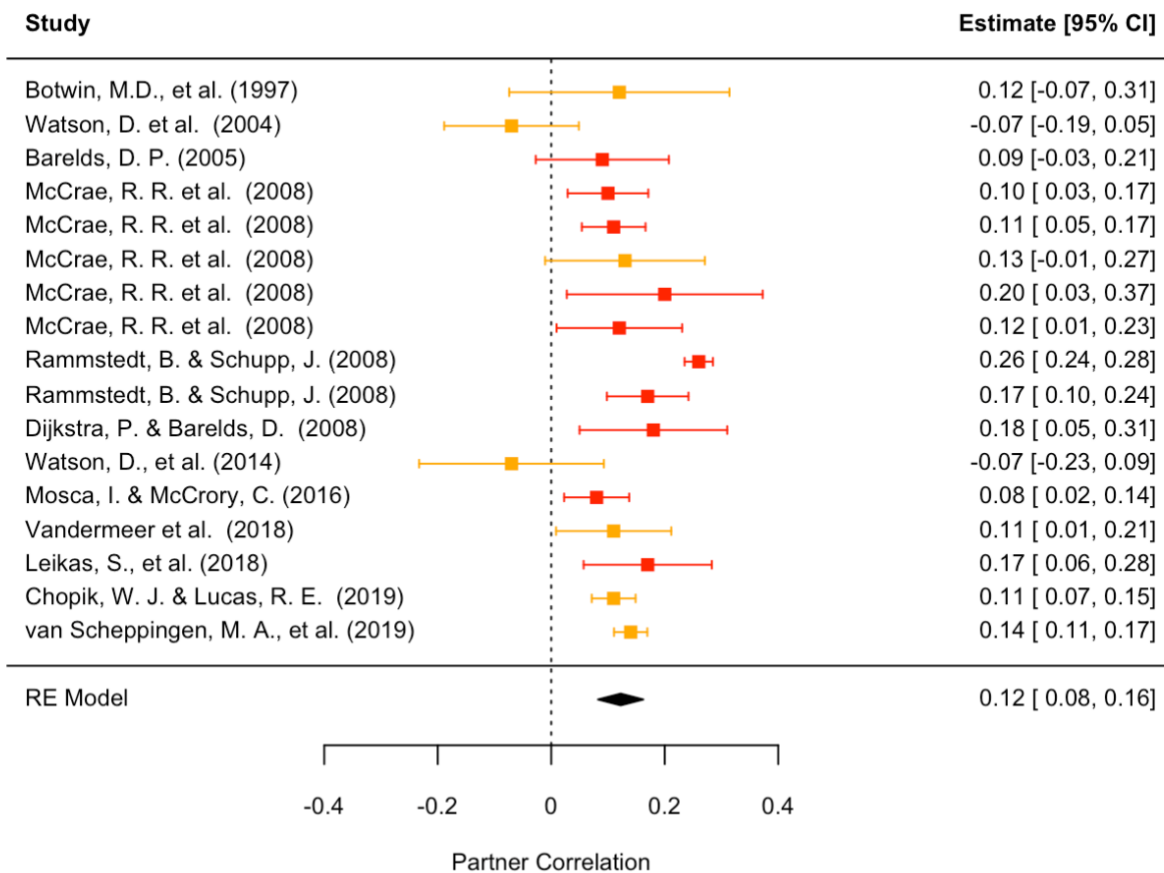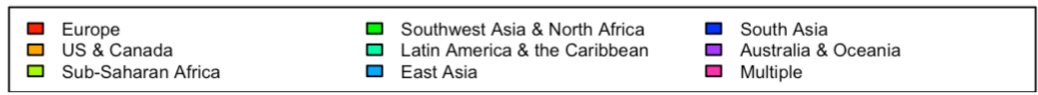

80

81

82 **Supplementary Figure 1h**

### Waist-to-Hip Ratio

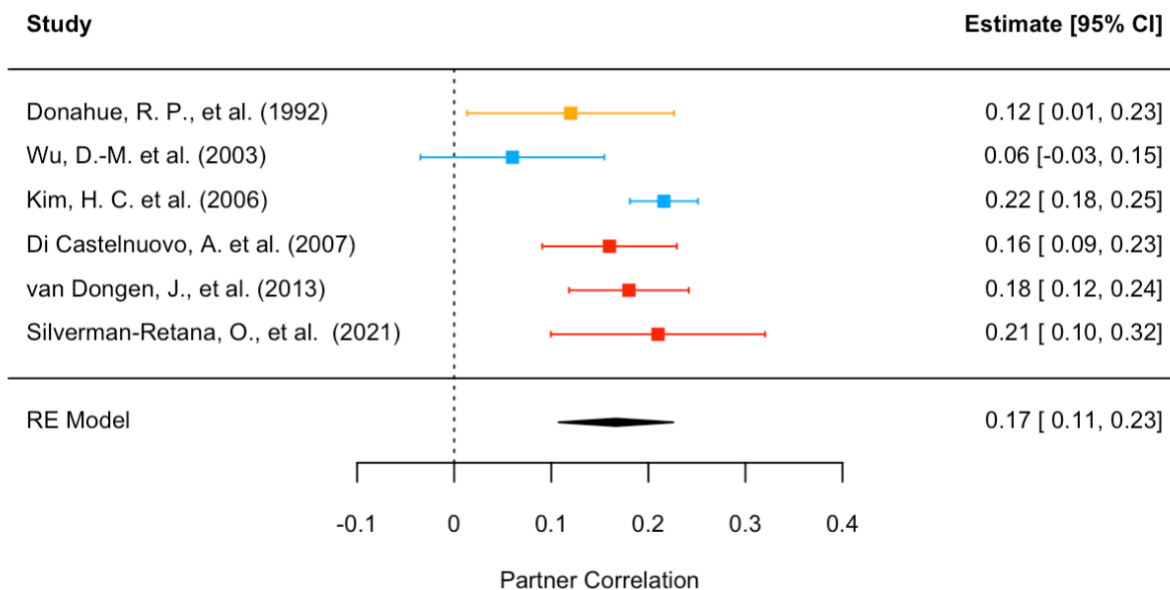

83

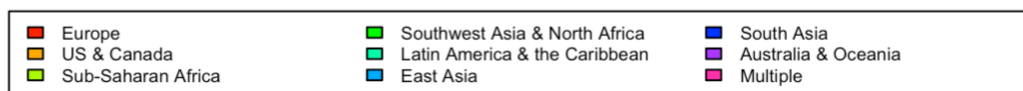

84

85 **Supplementary Figure 1i**

### Depression

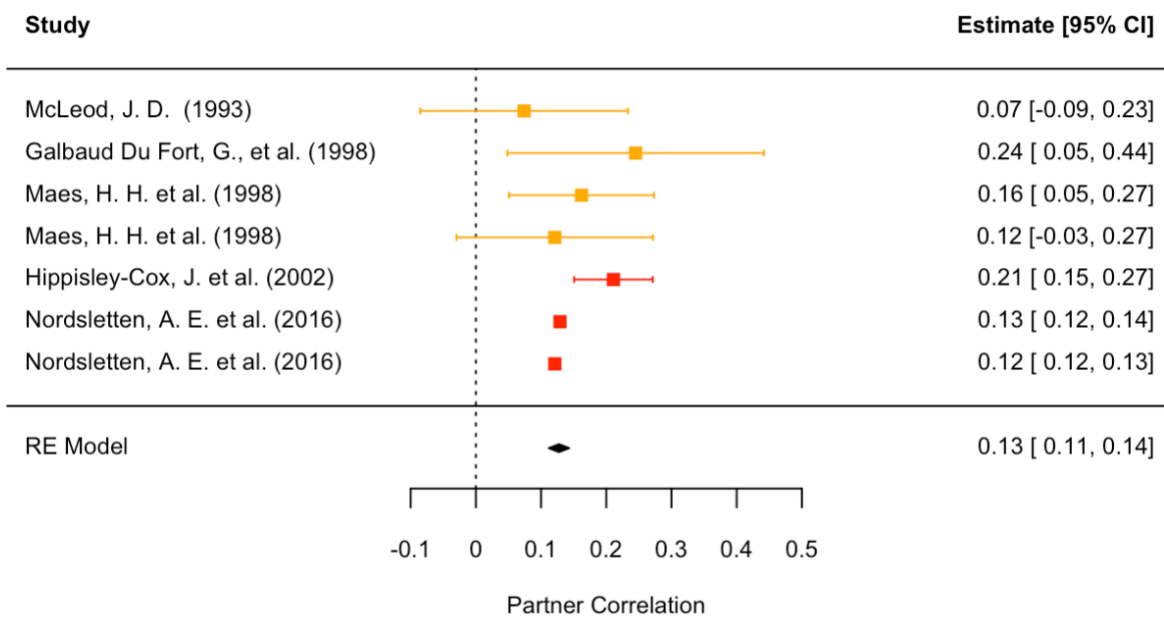

86

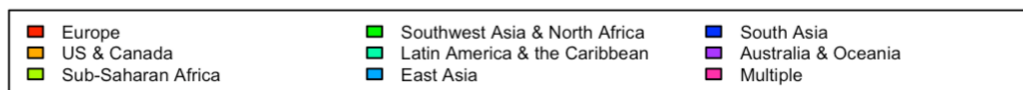

87

88 **Supplementary Figure 1j**

### Diabetes

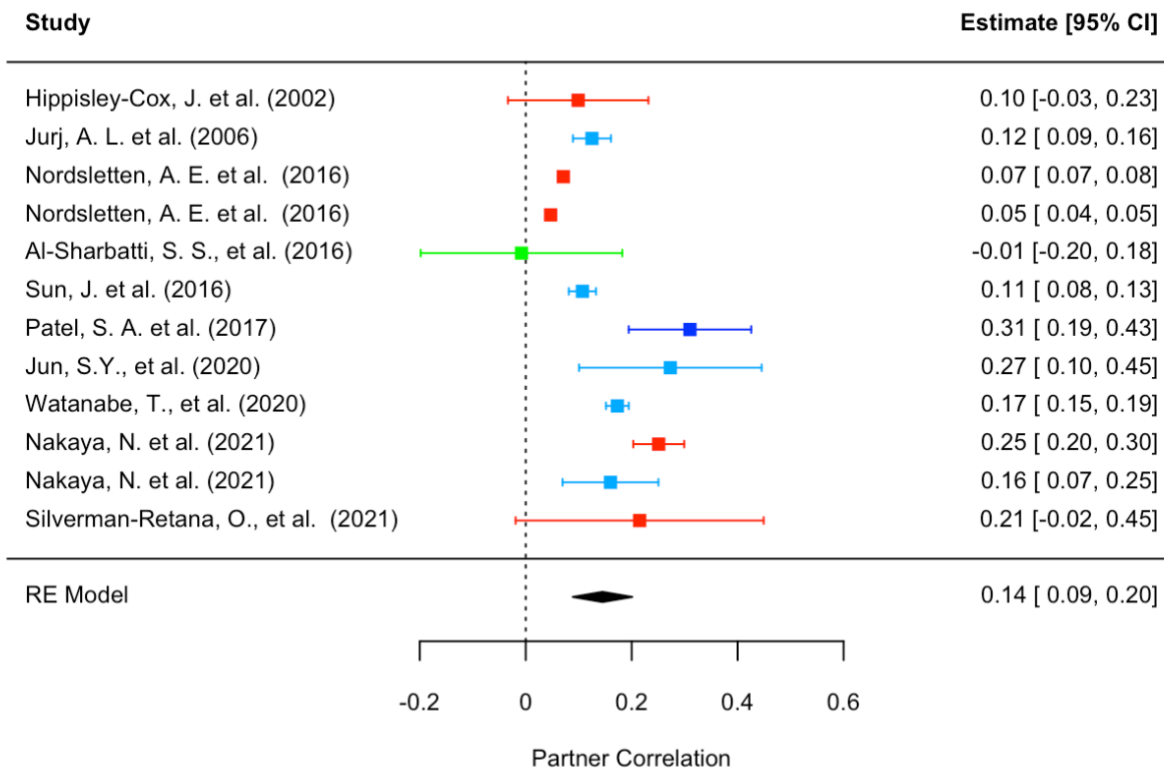

89

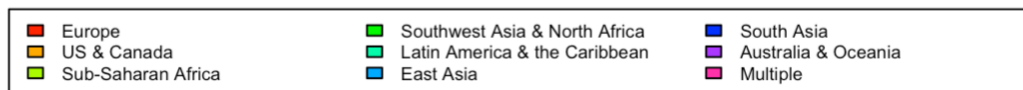

90

91 **Supplementary Figure 1k**

### Generalized Anxiety

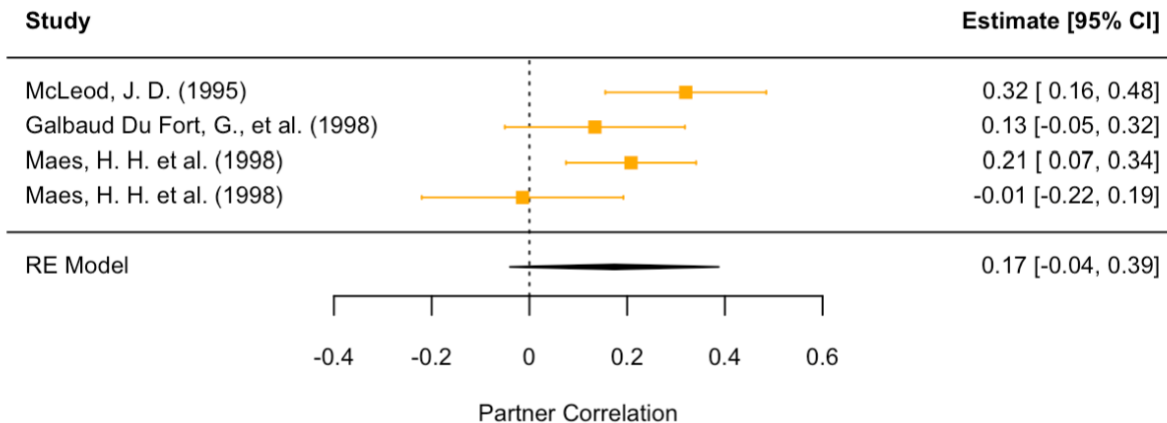

92

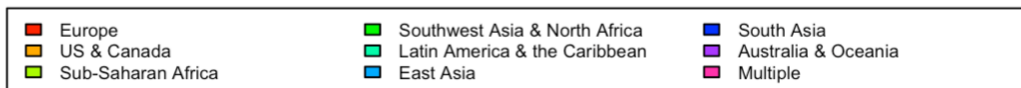

93



94 **Supplementary Figure 11**

### Political Values

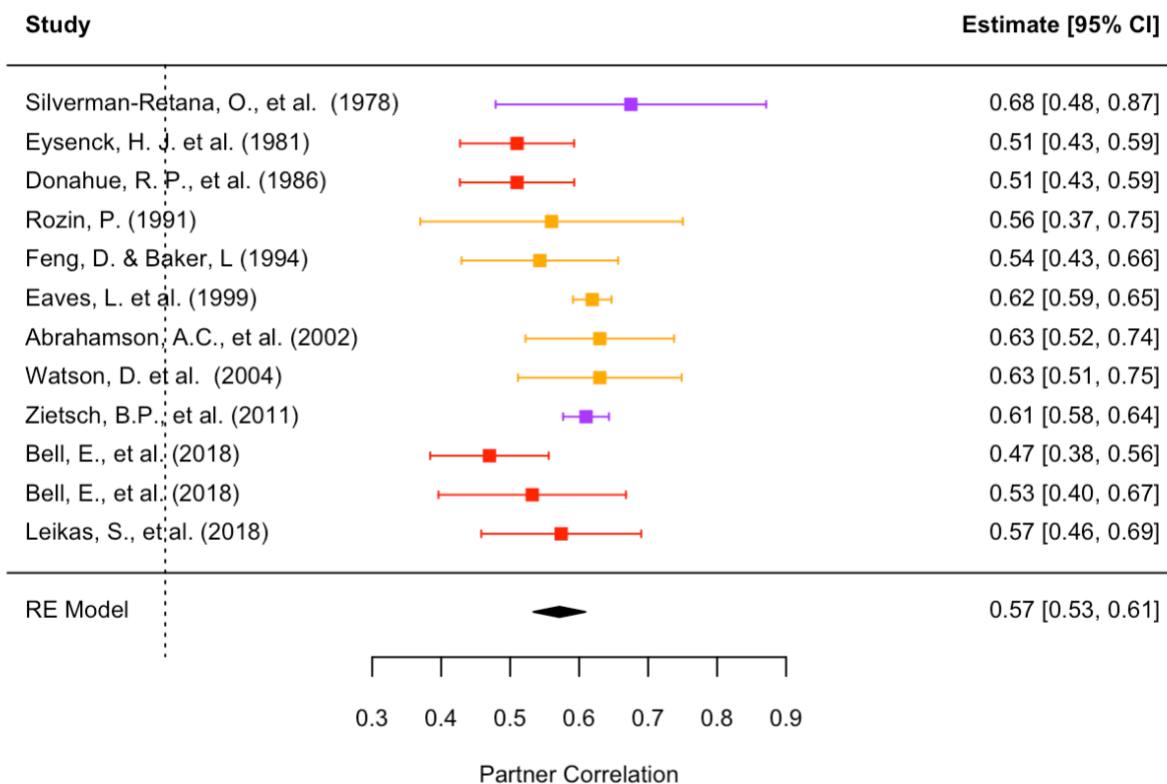

95

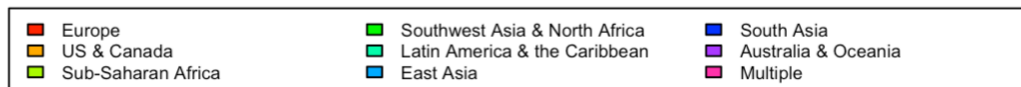

96

97 **Supplementary Figure 1m**

### Religiosity

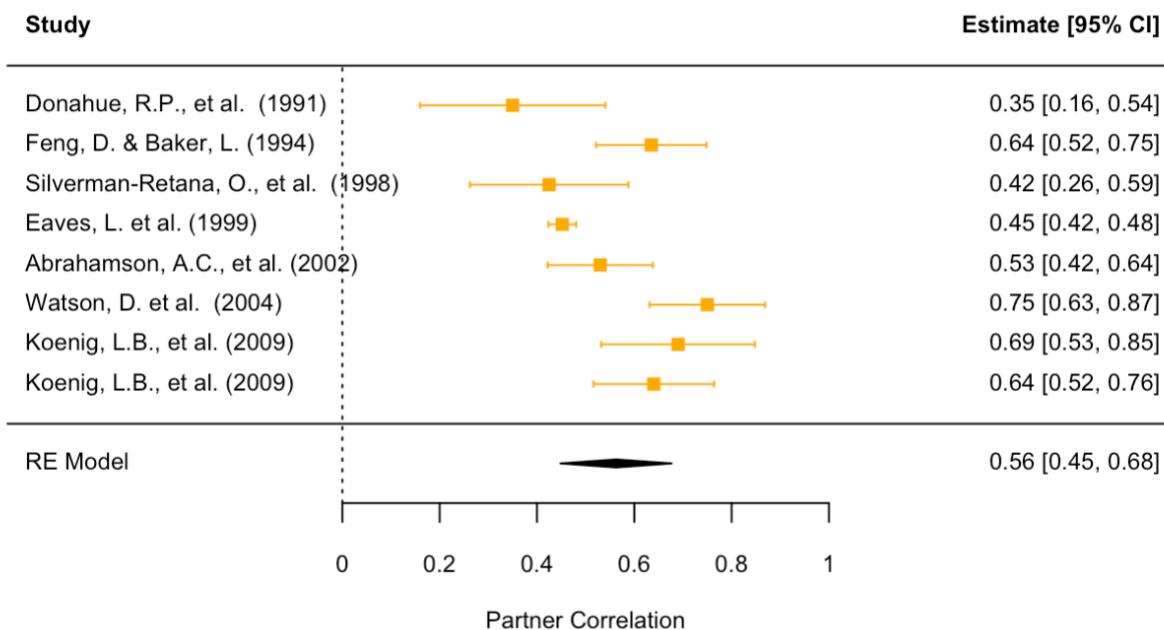

98

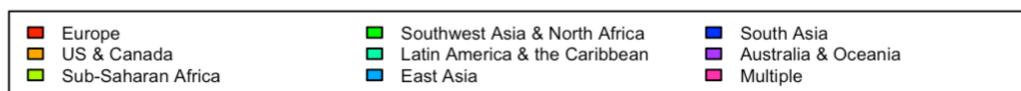

99

100 **Supplementary Figure 1n**

### Smoking Initiation

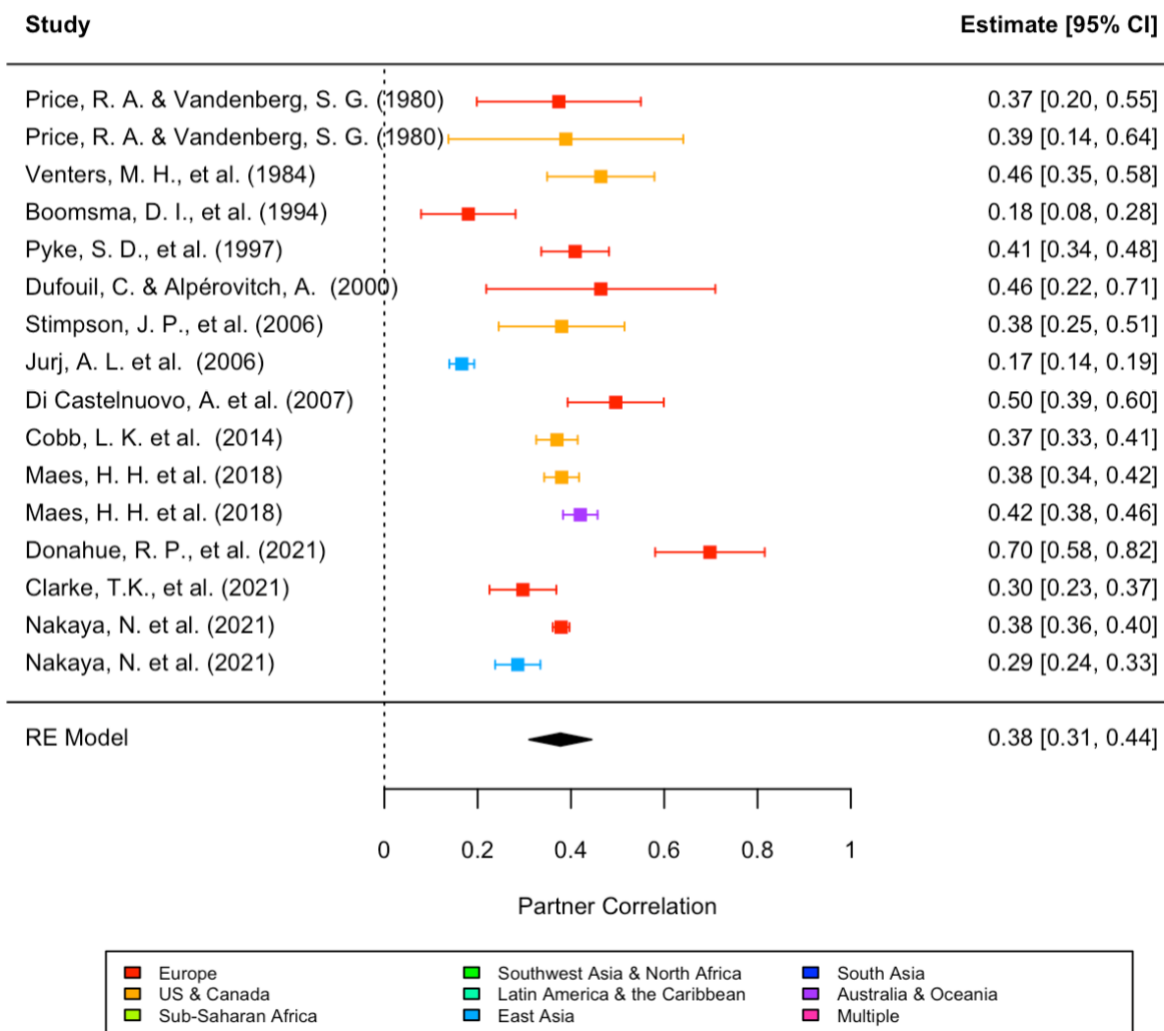

101

102

103 **Supplementary Figure 1o**

### Smoking Cessation

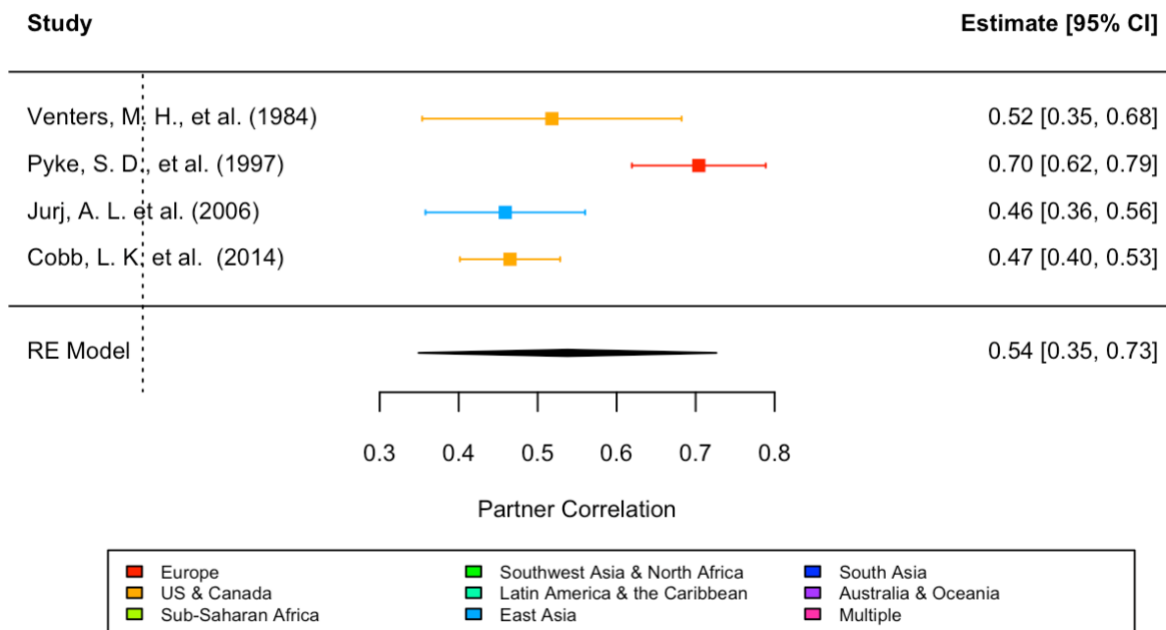

104

105

106  
107  
108

**Supplementary Figure 1p**

**Problematic Alcohol Use**

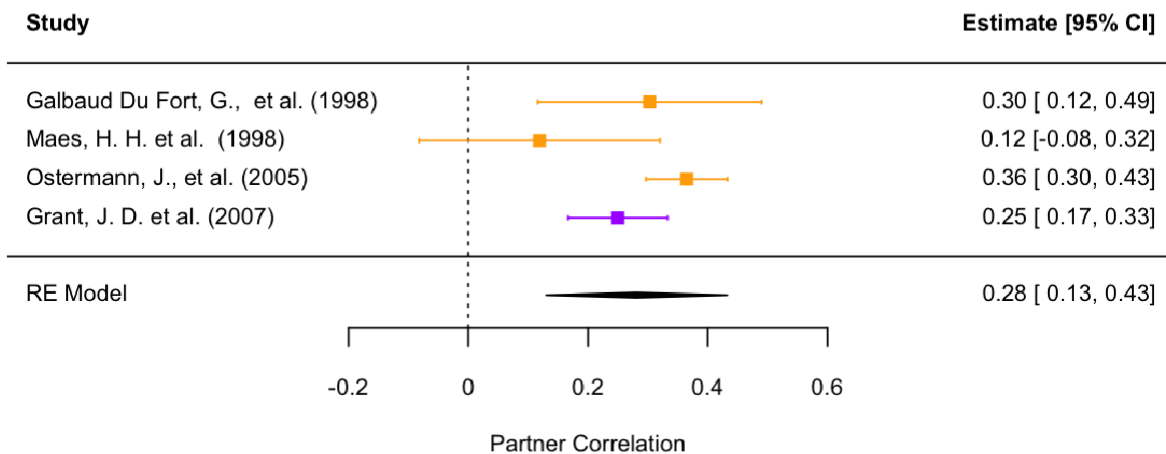

109

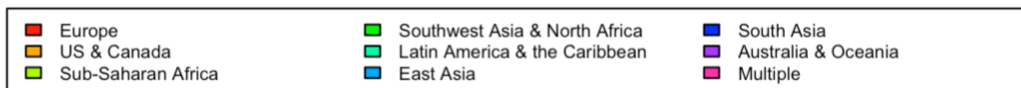

110

111 **Supplementary Figure 1q**  
 112

### Substance Use Disorder

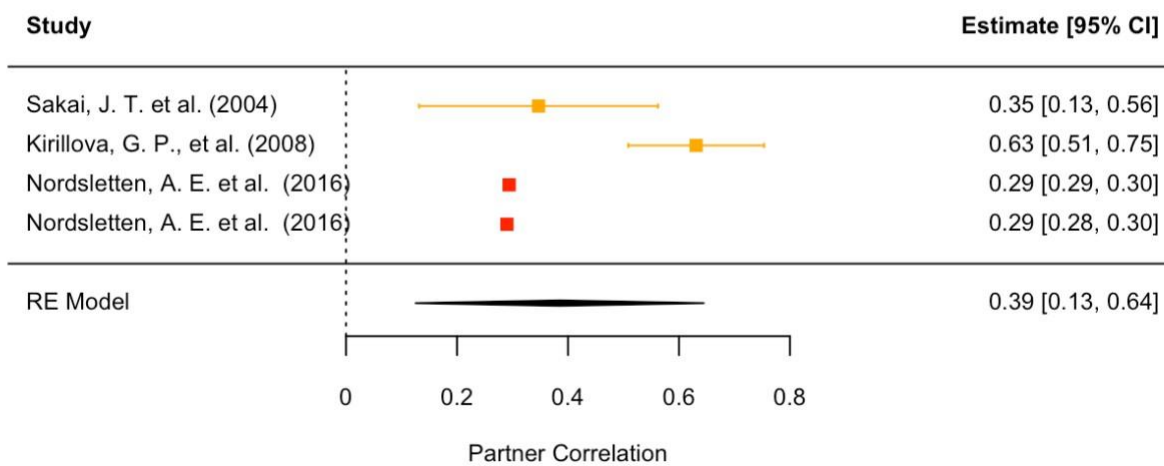

113  
 114  
 115

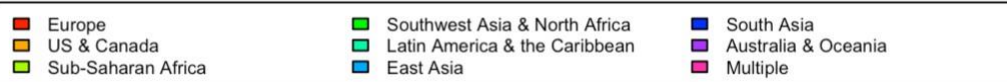

116

117 **Supplementary Figure 1r**

### Body Mass Index

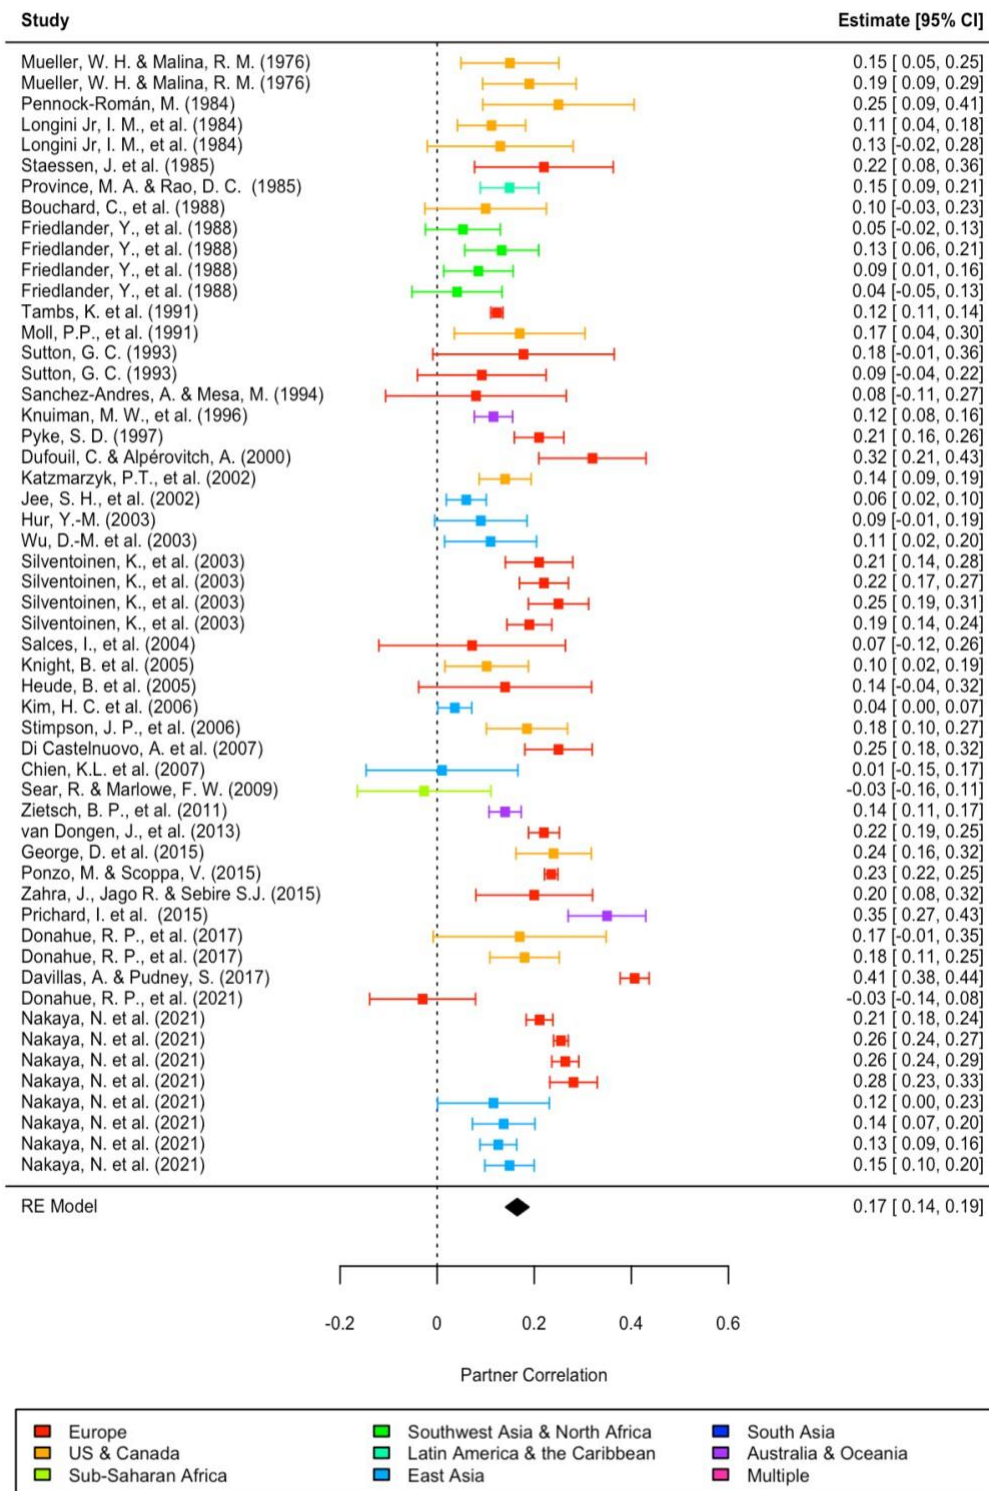

118

119

120 **Supplementary Figure 1s**

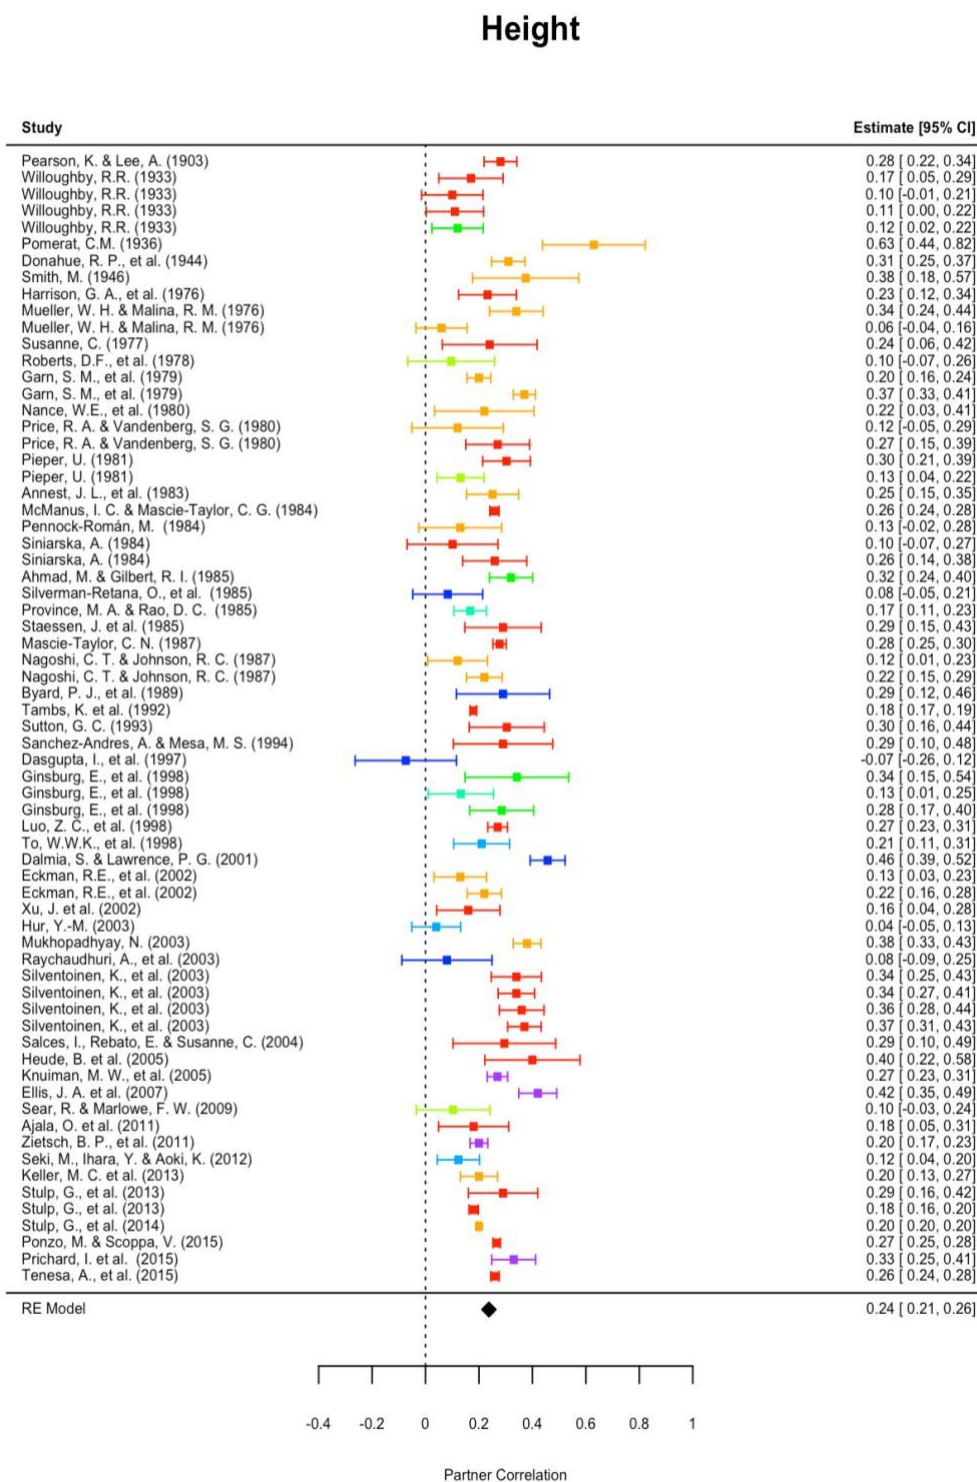

121

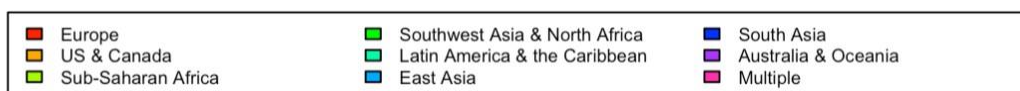

122



### Educational Attainment

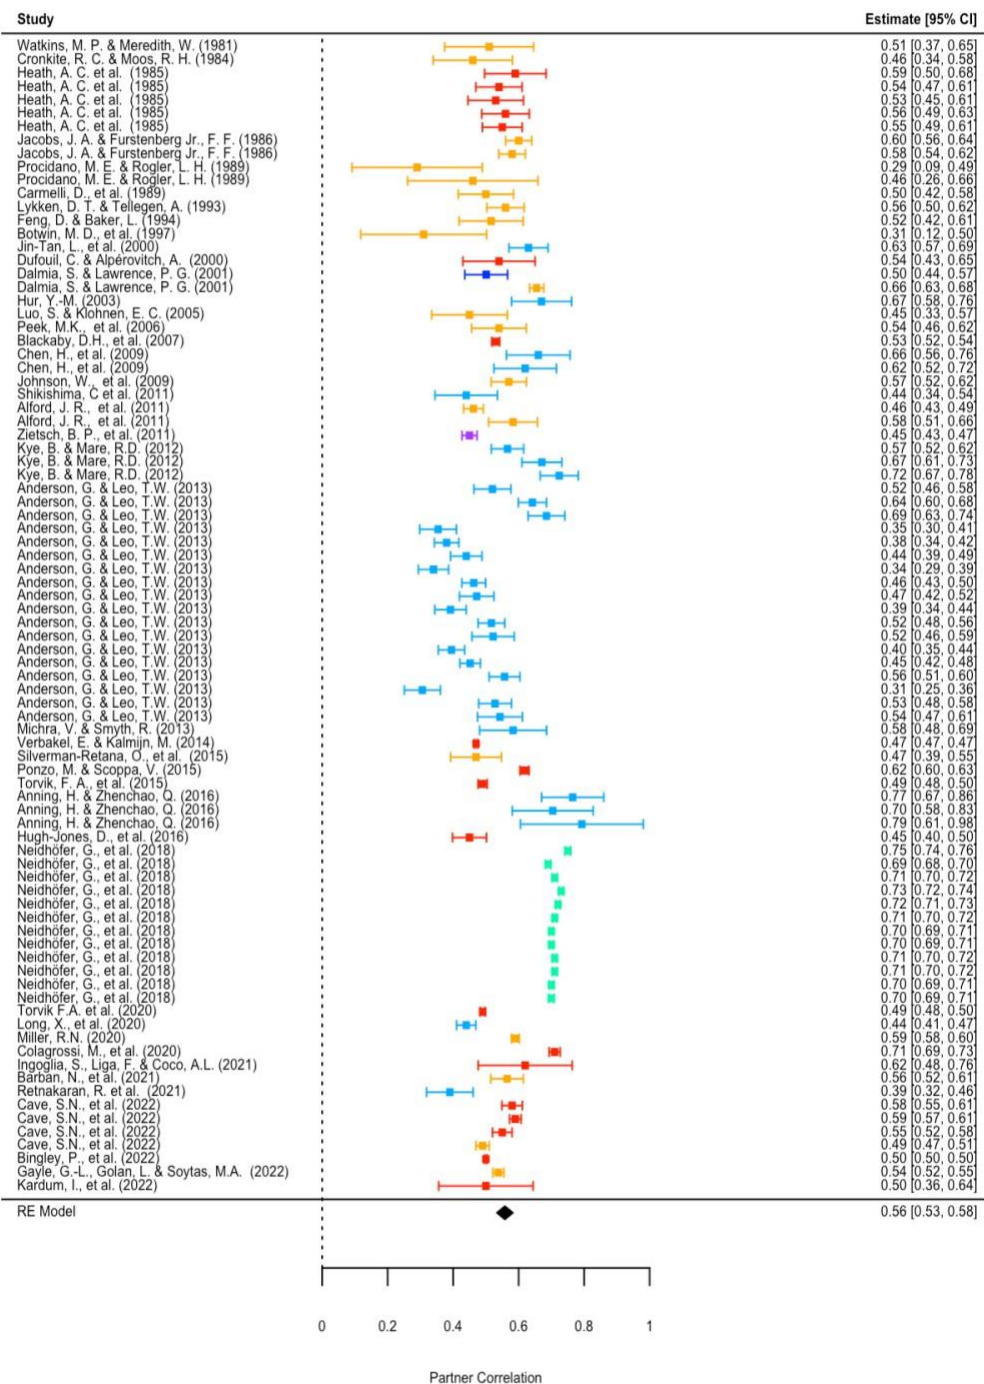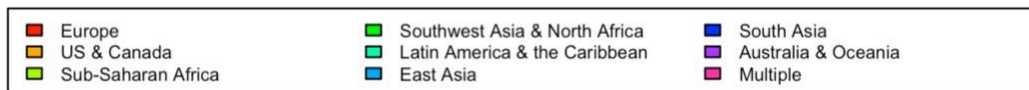

126

**Supplementary Figure 1u**

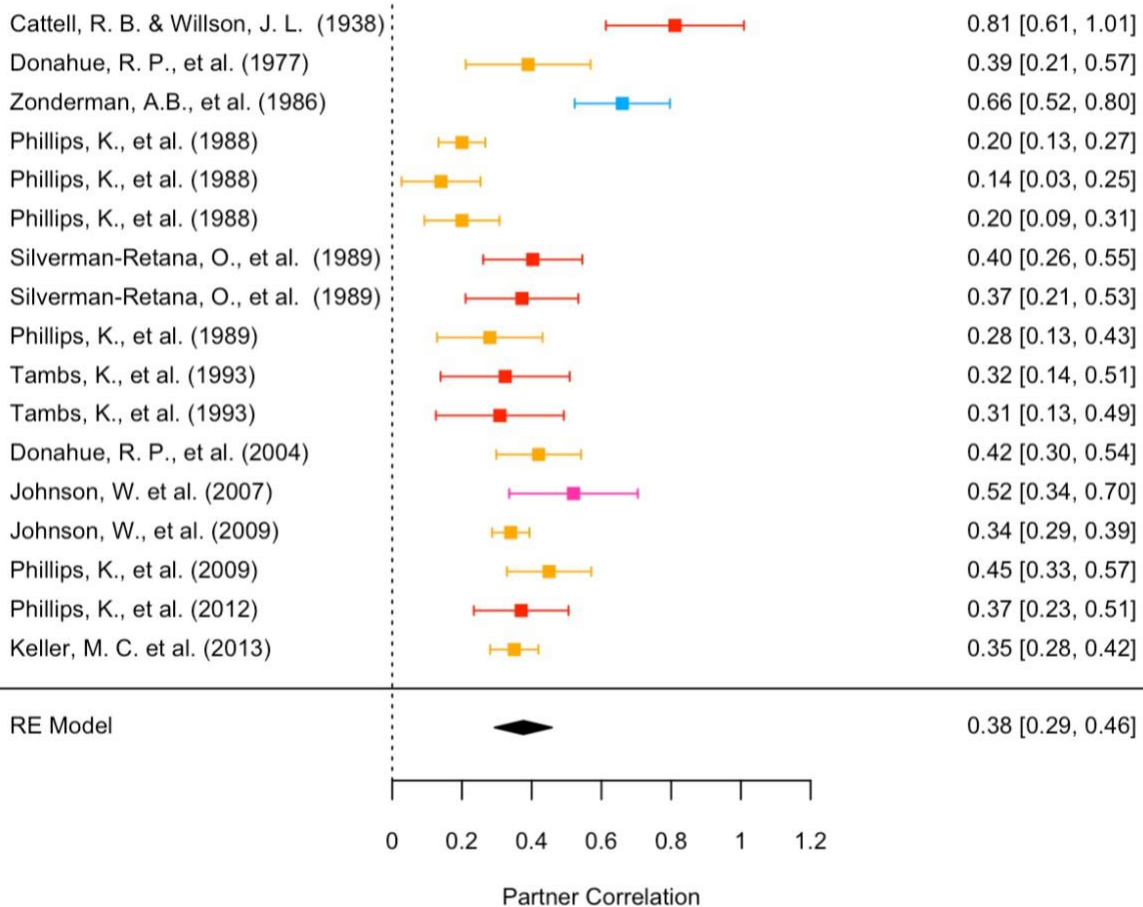

127

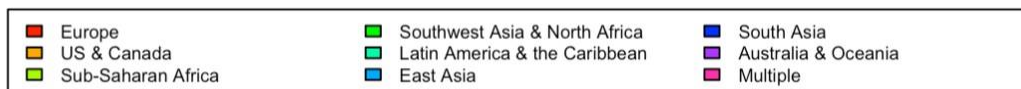

128

129

130

131

132

133

### Conscientiousness

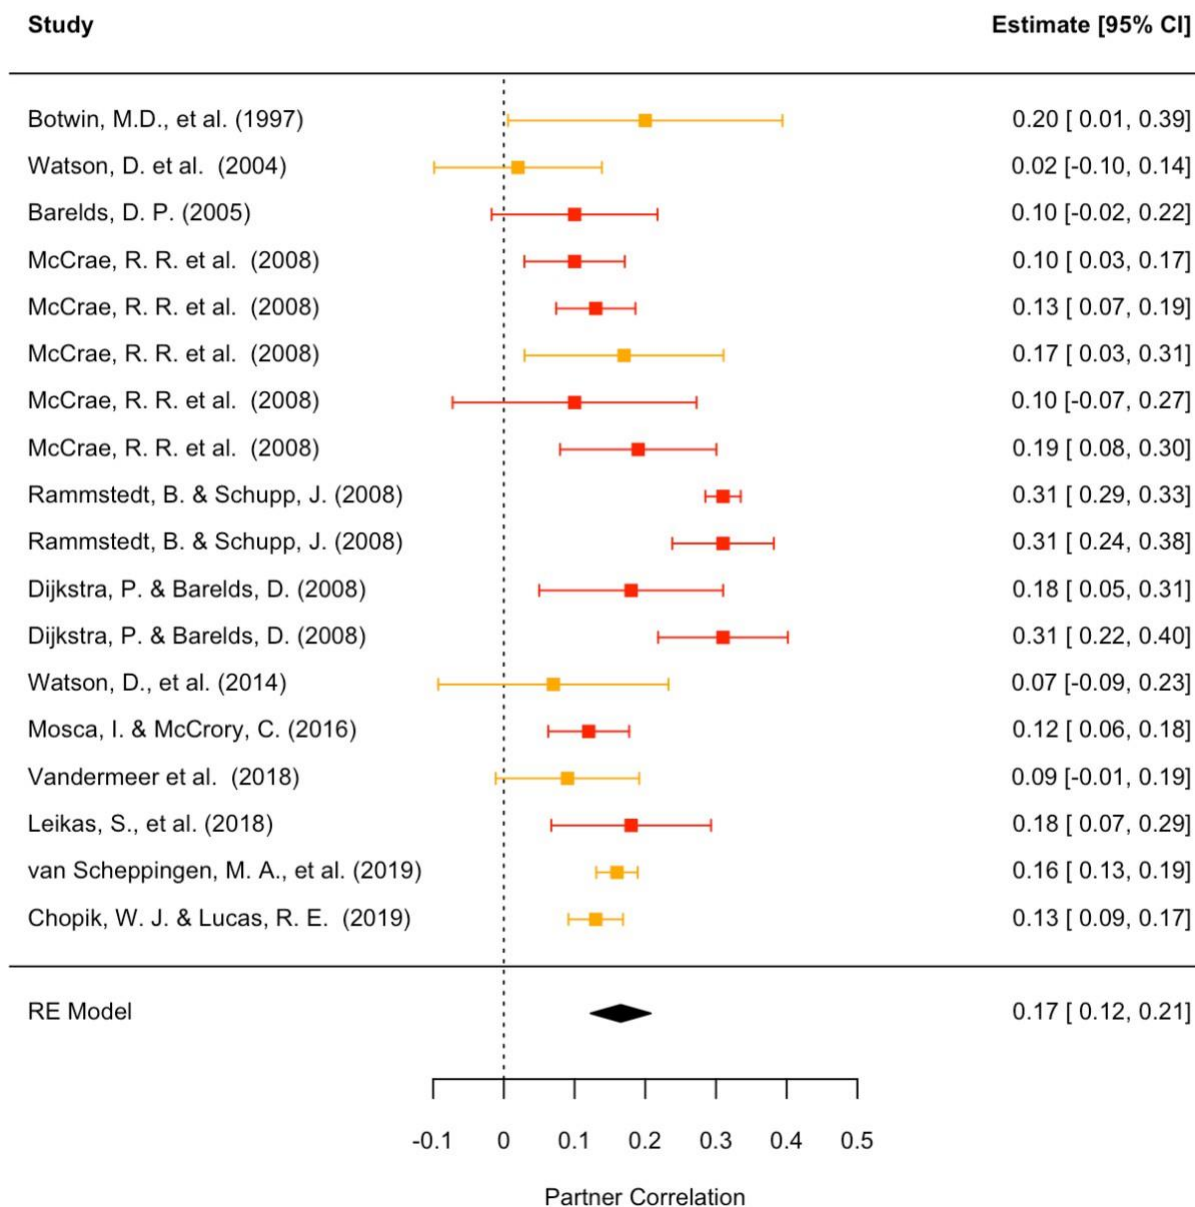

135

136

137

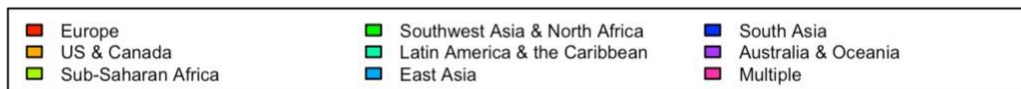

Estimates within each phenotype are sorted by year of publication (from top to bottom) and are color-coded to indicate the region from which the sample was taken, as indicated in the legend

138 **Supplementary Figure 2: PRISMA flow diagrams.**

139

140

141

142

143

144

145

146

147

148

149

150

151

152

153

154

155

156

157

158

159

160

161

162

163

164

165

166

167

168

169

170

171

172

173

174

175

176

177

178

179

180

181

182

**Substance use disorder**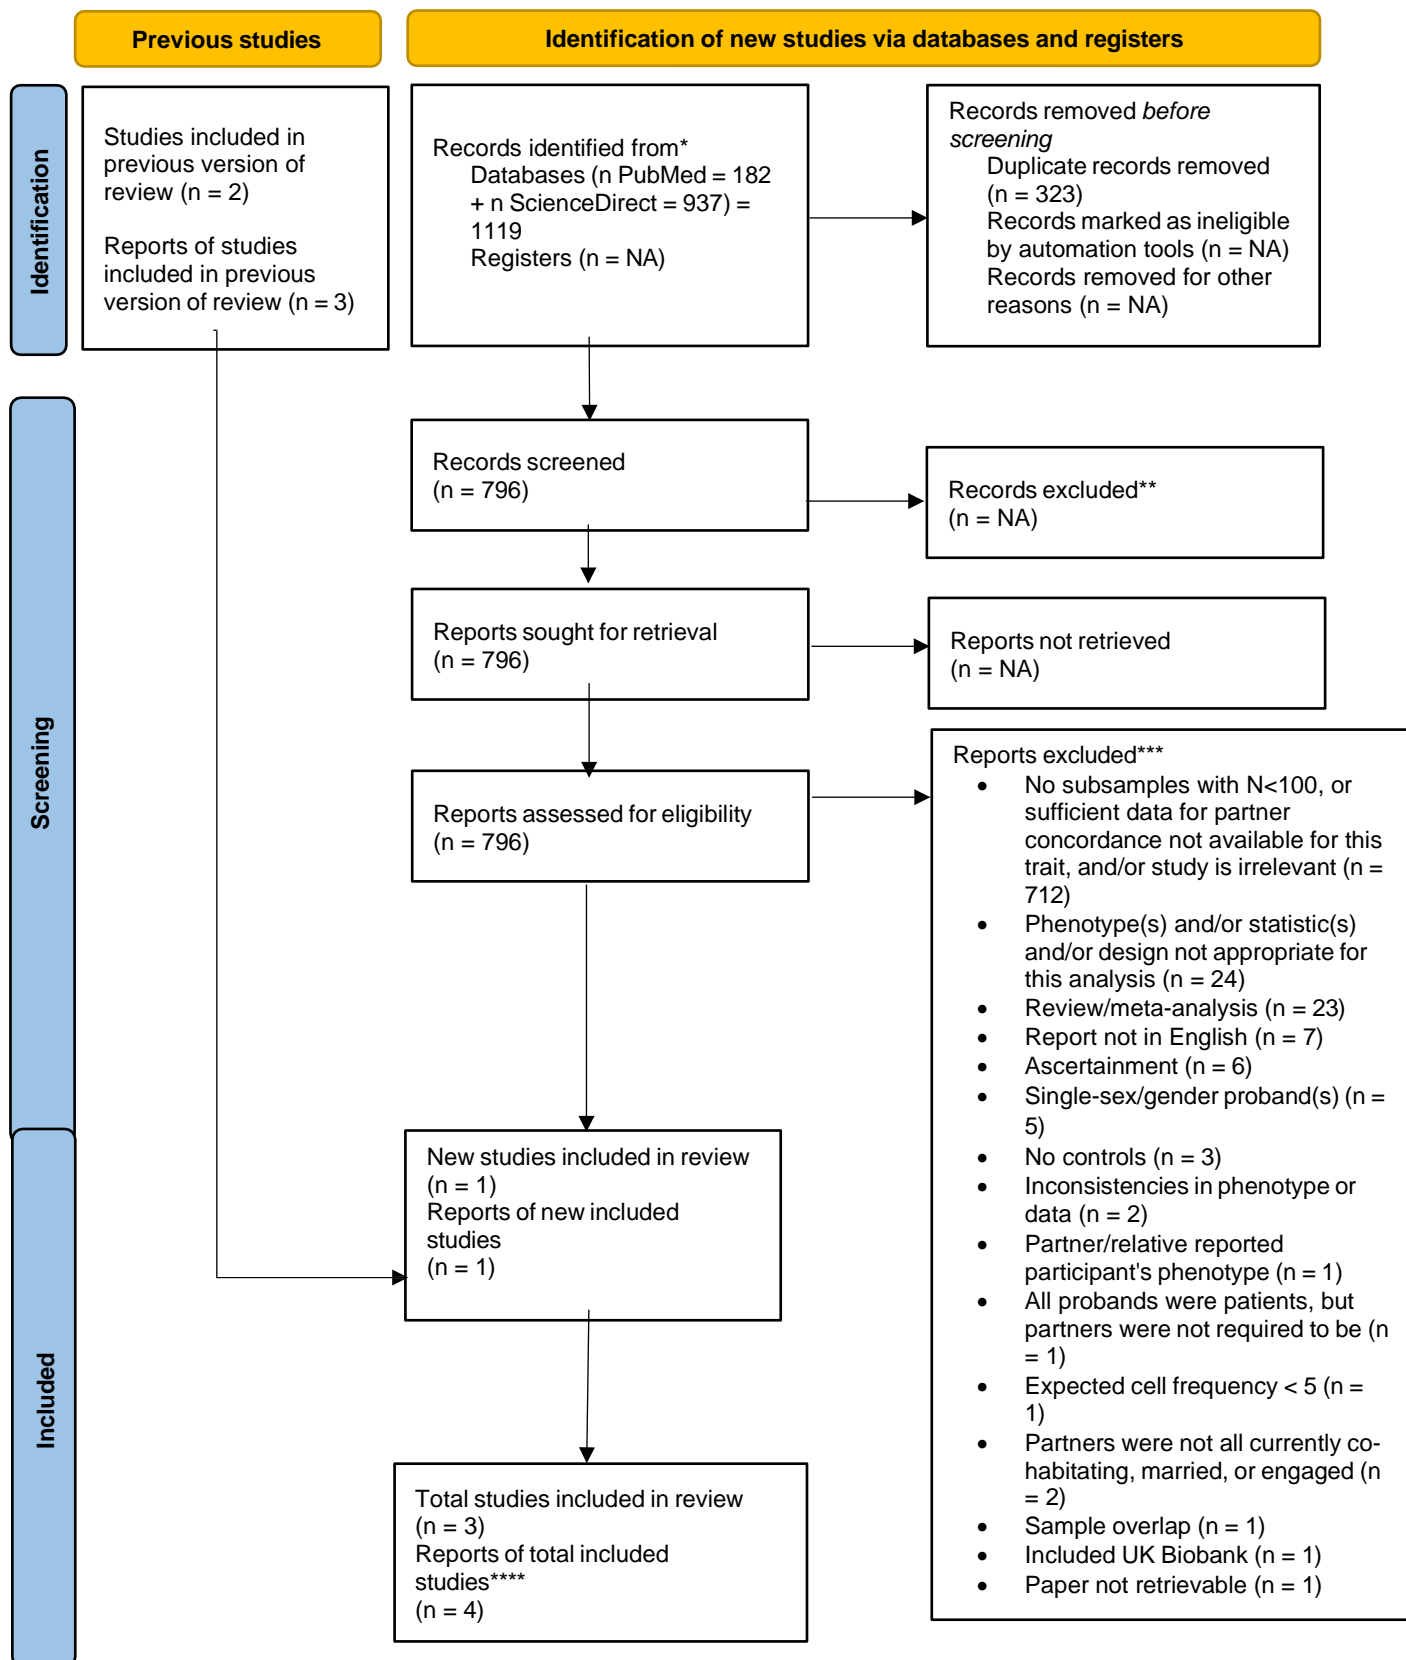

## Problematic alcohol use

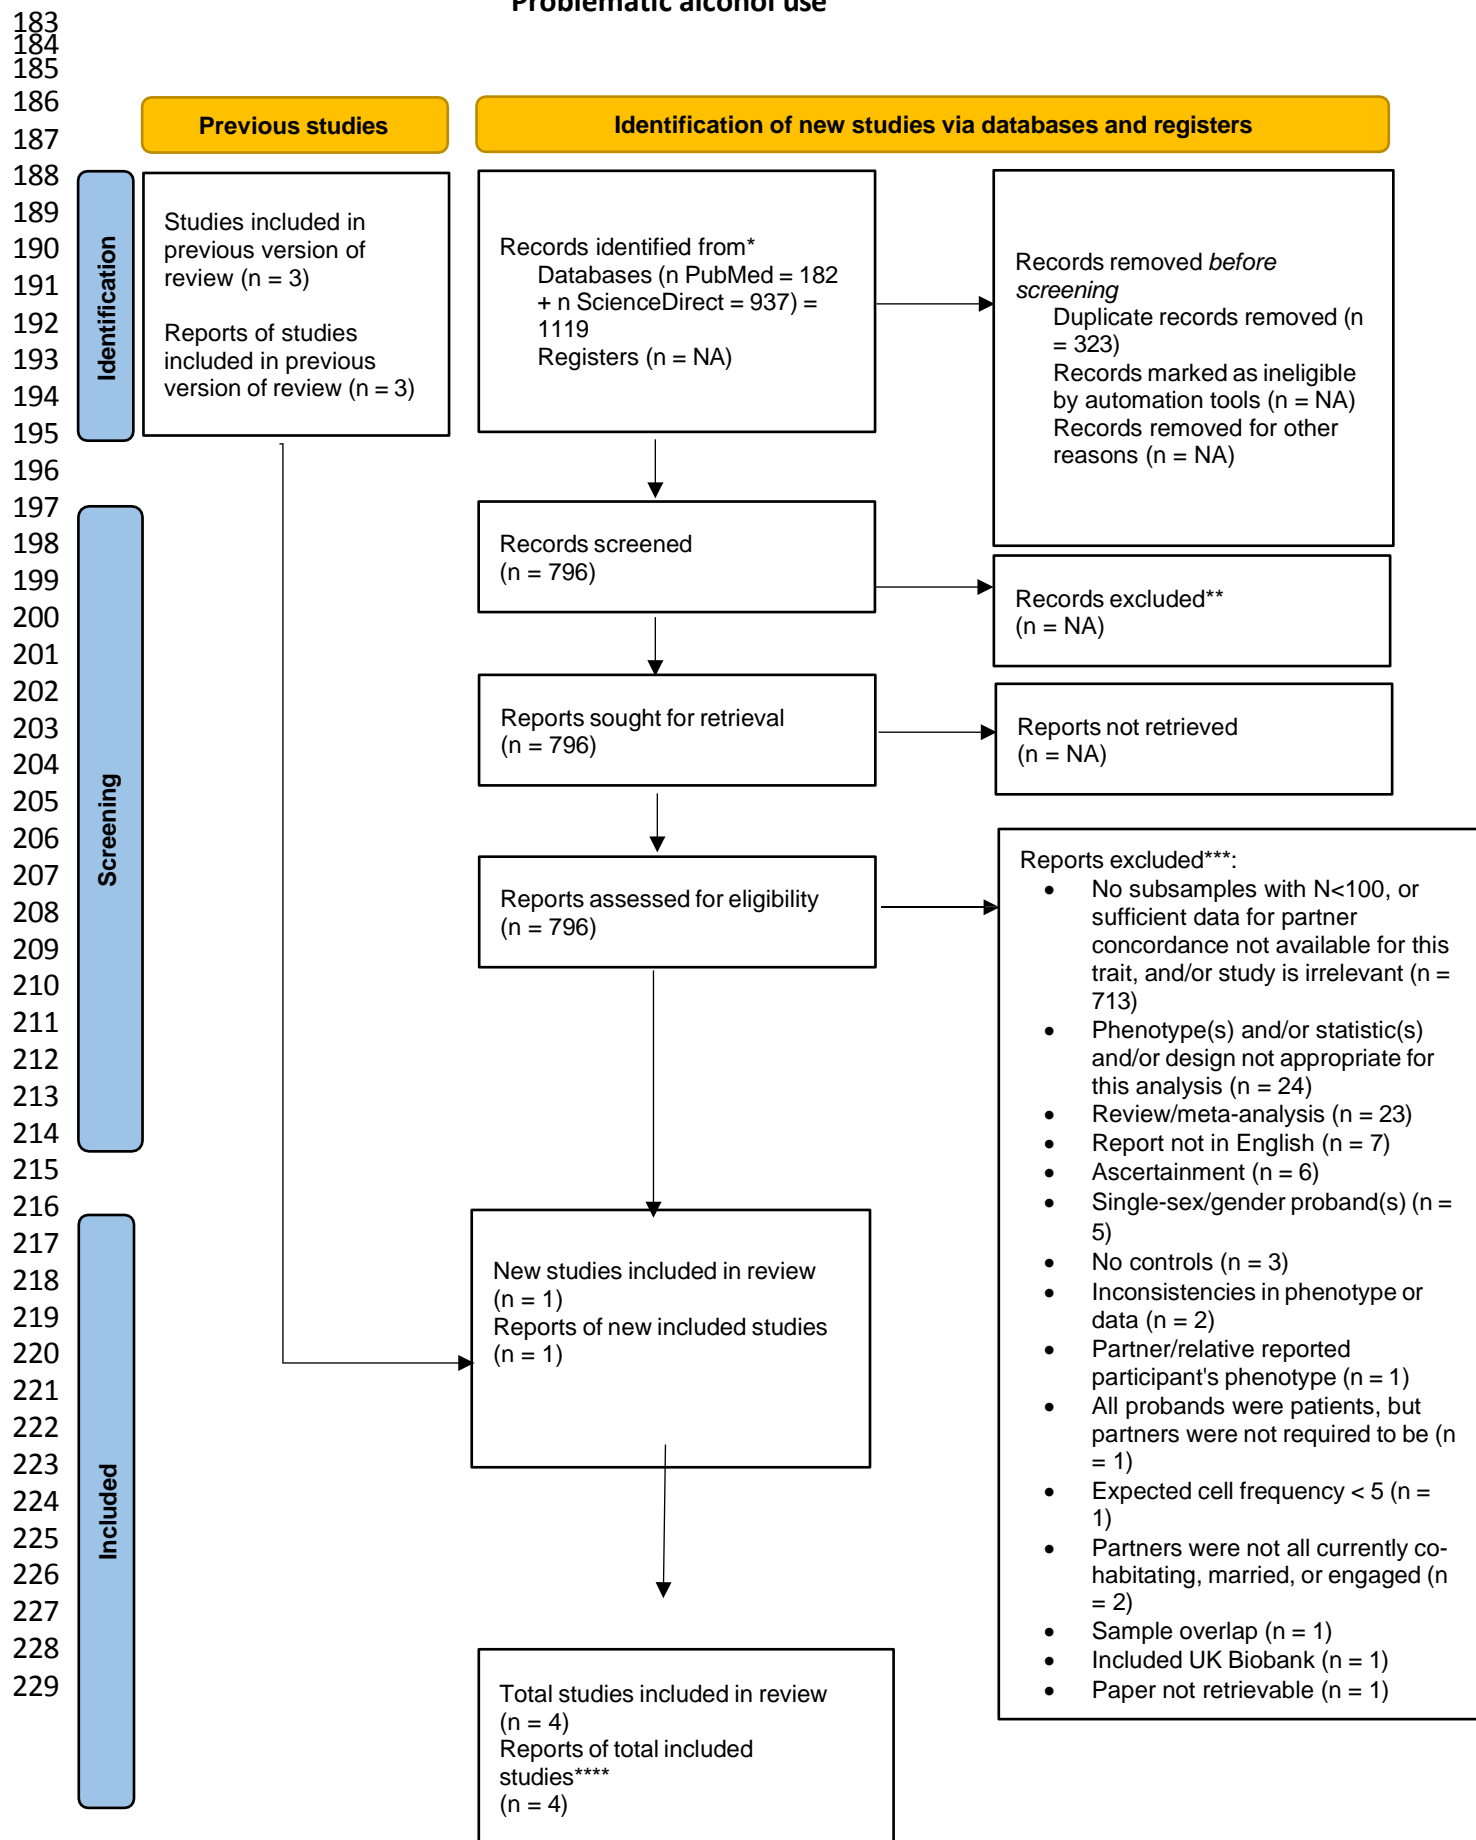

## Drinking quantity

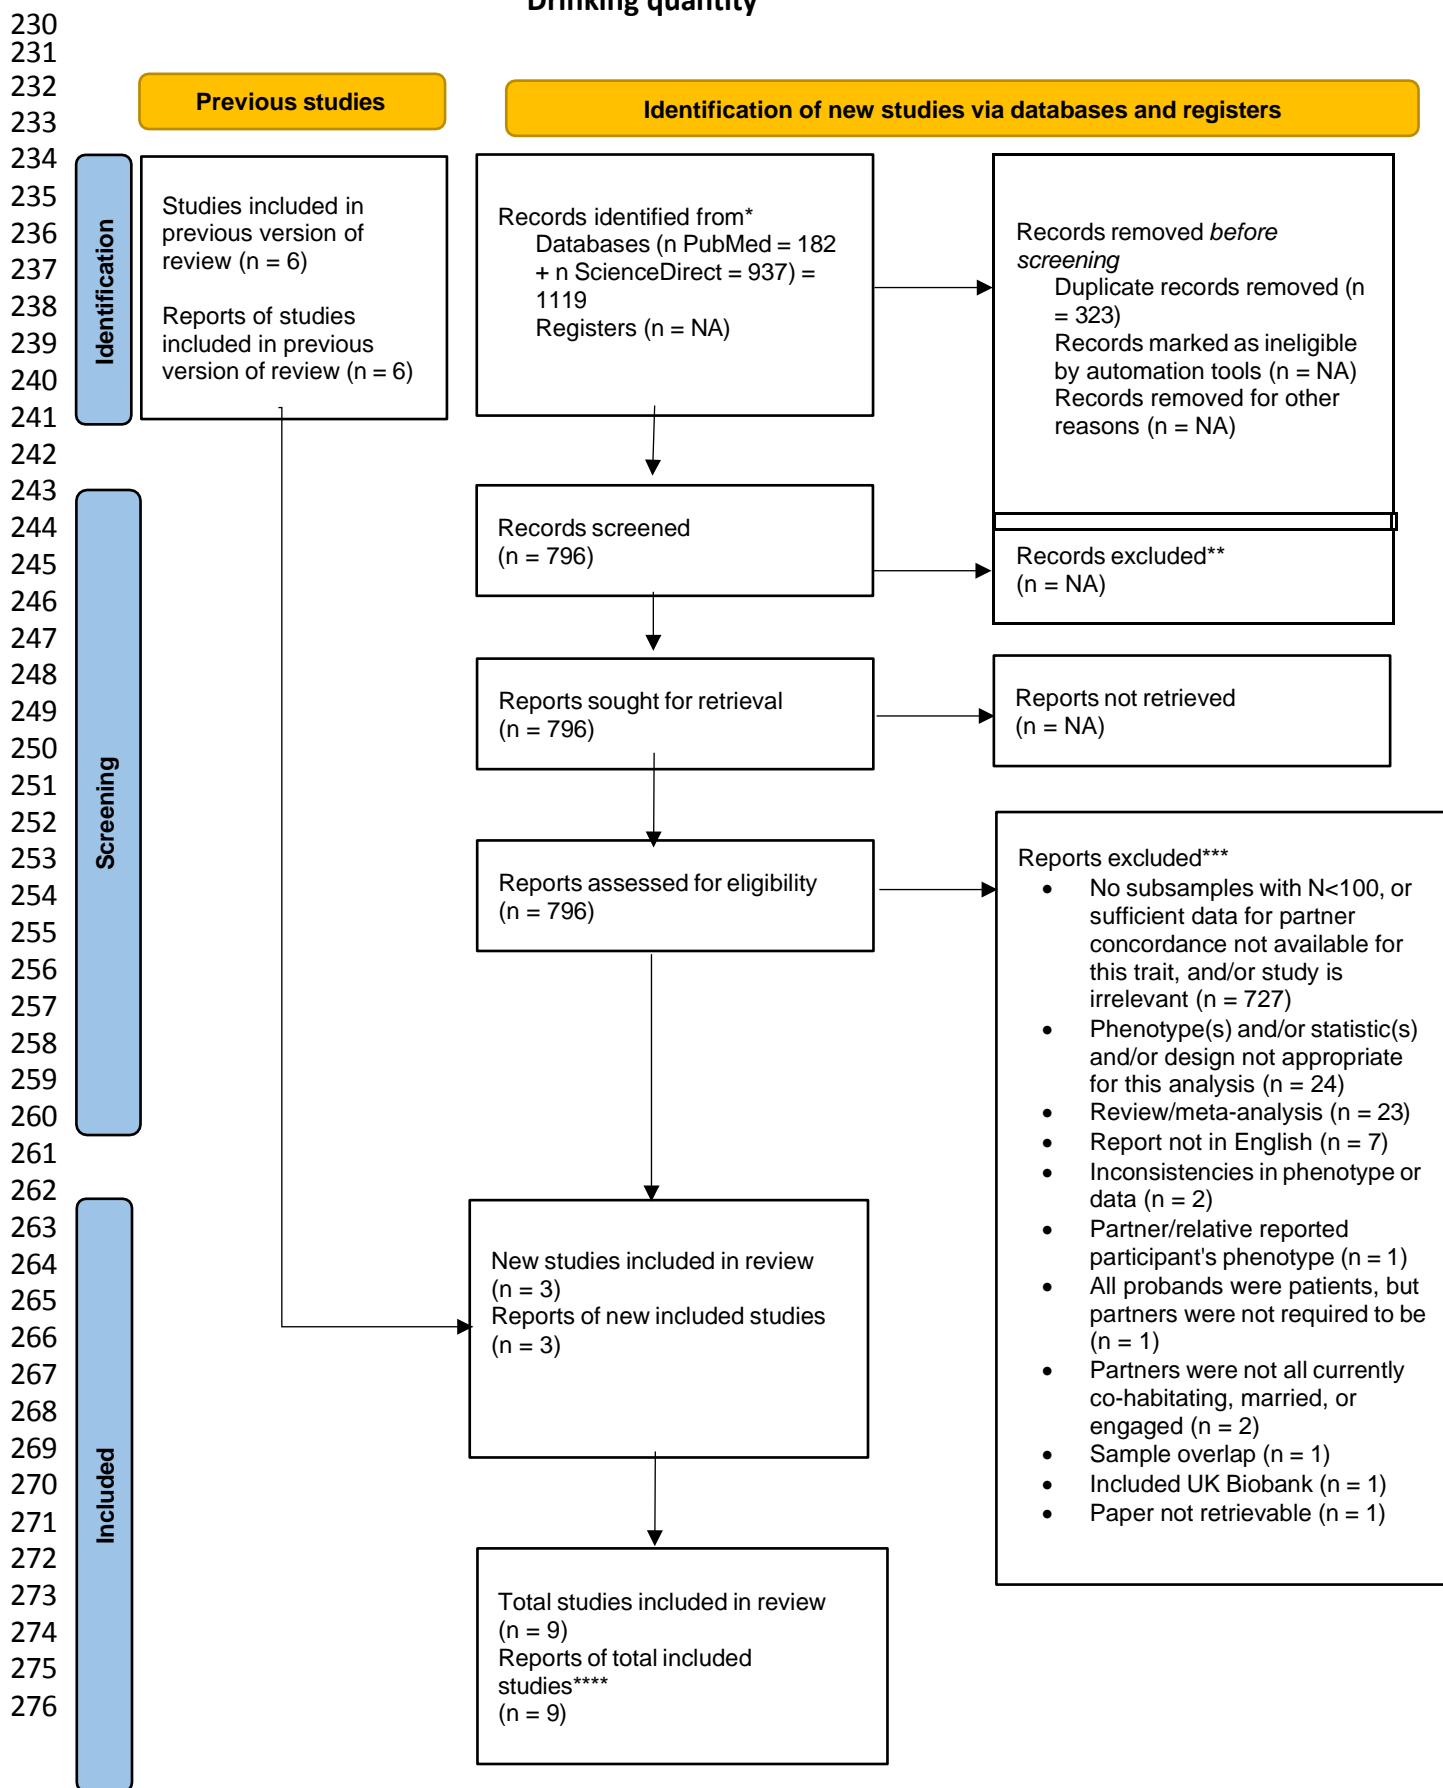

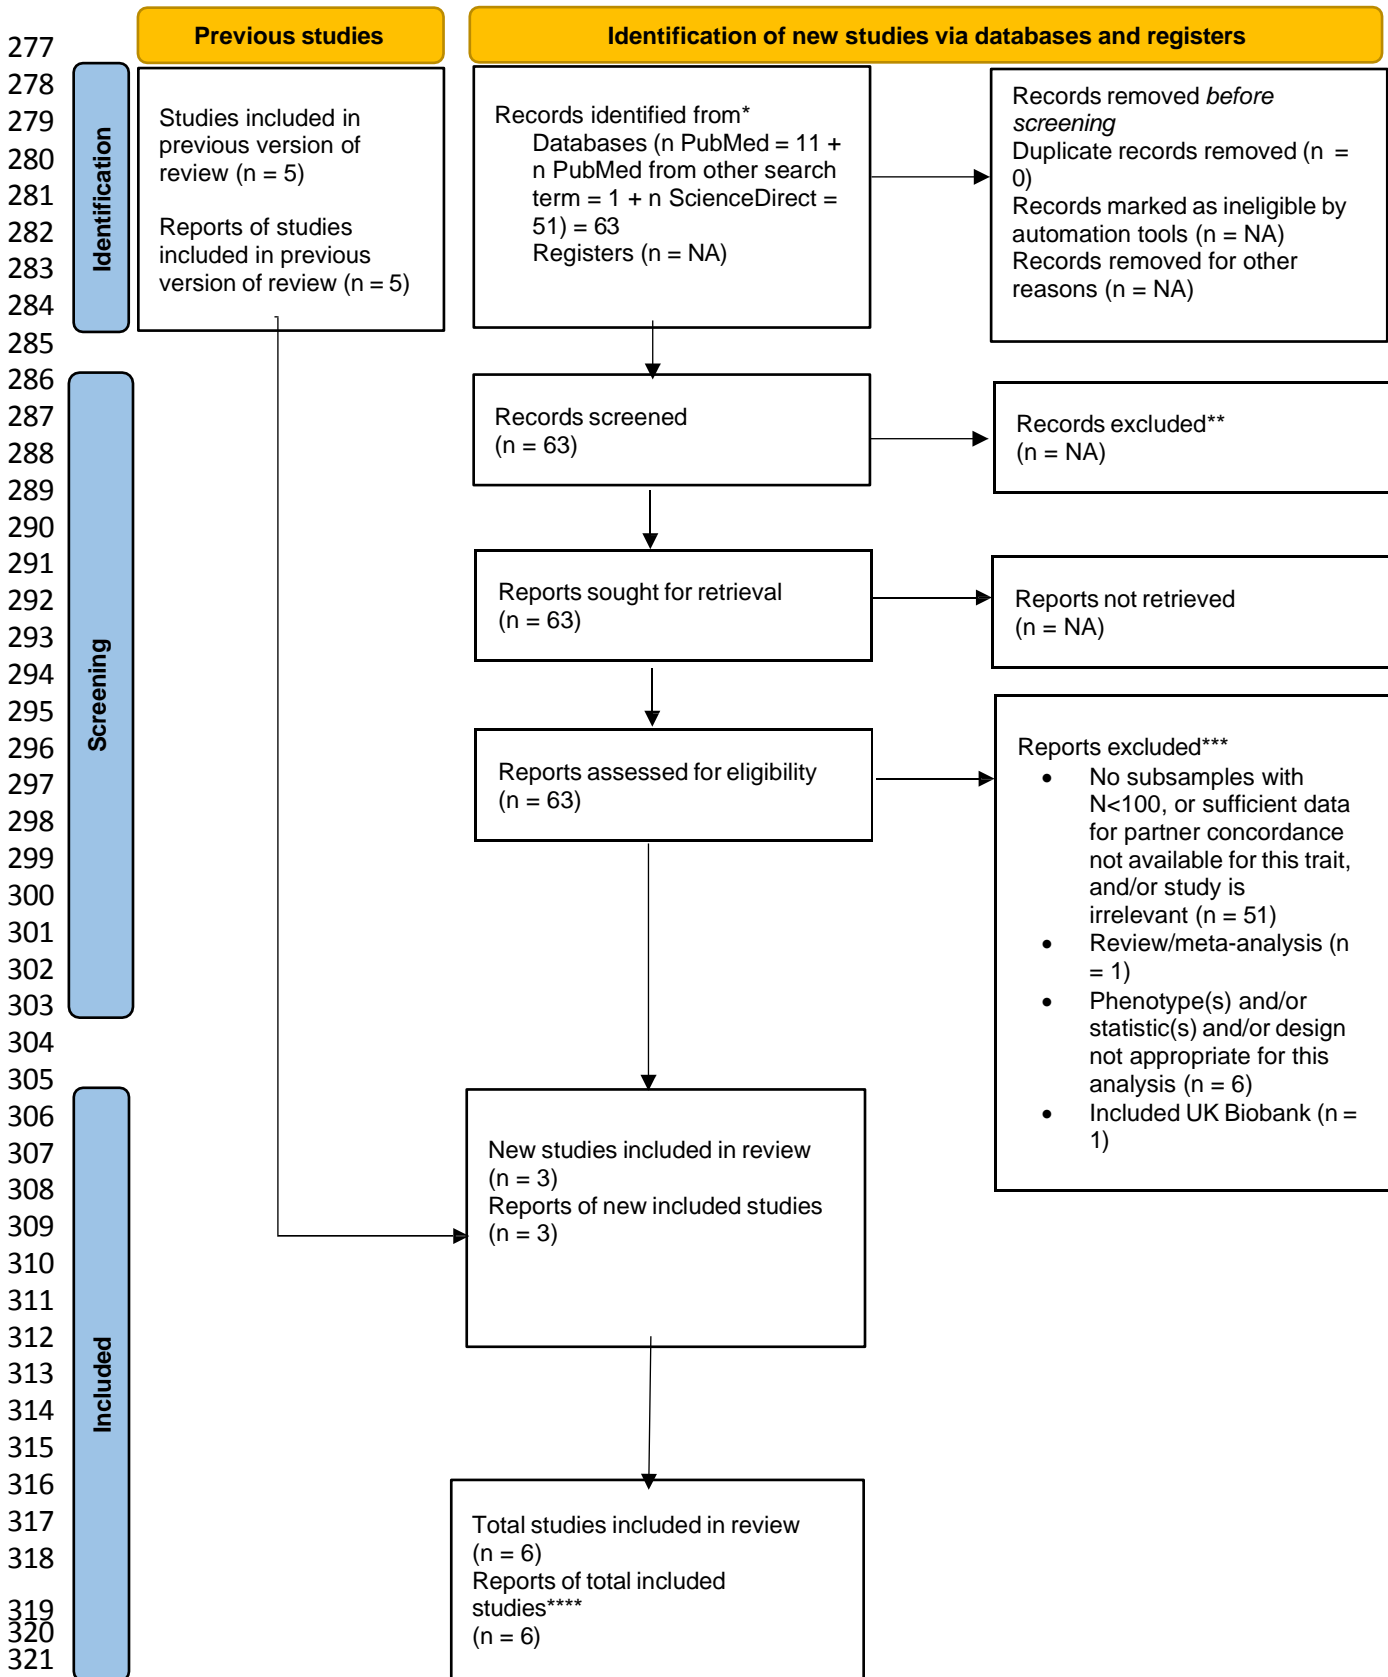

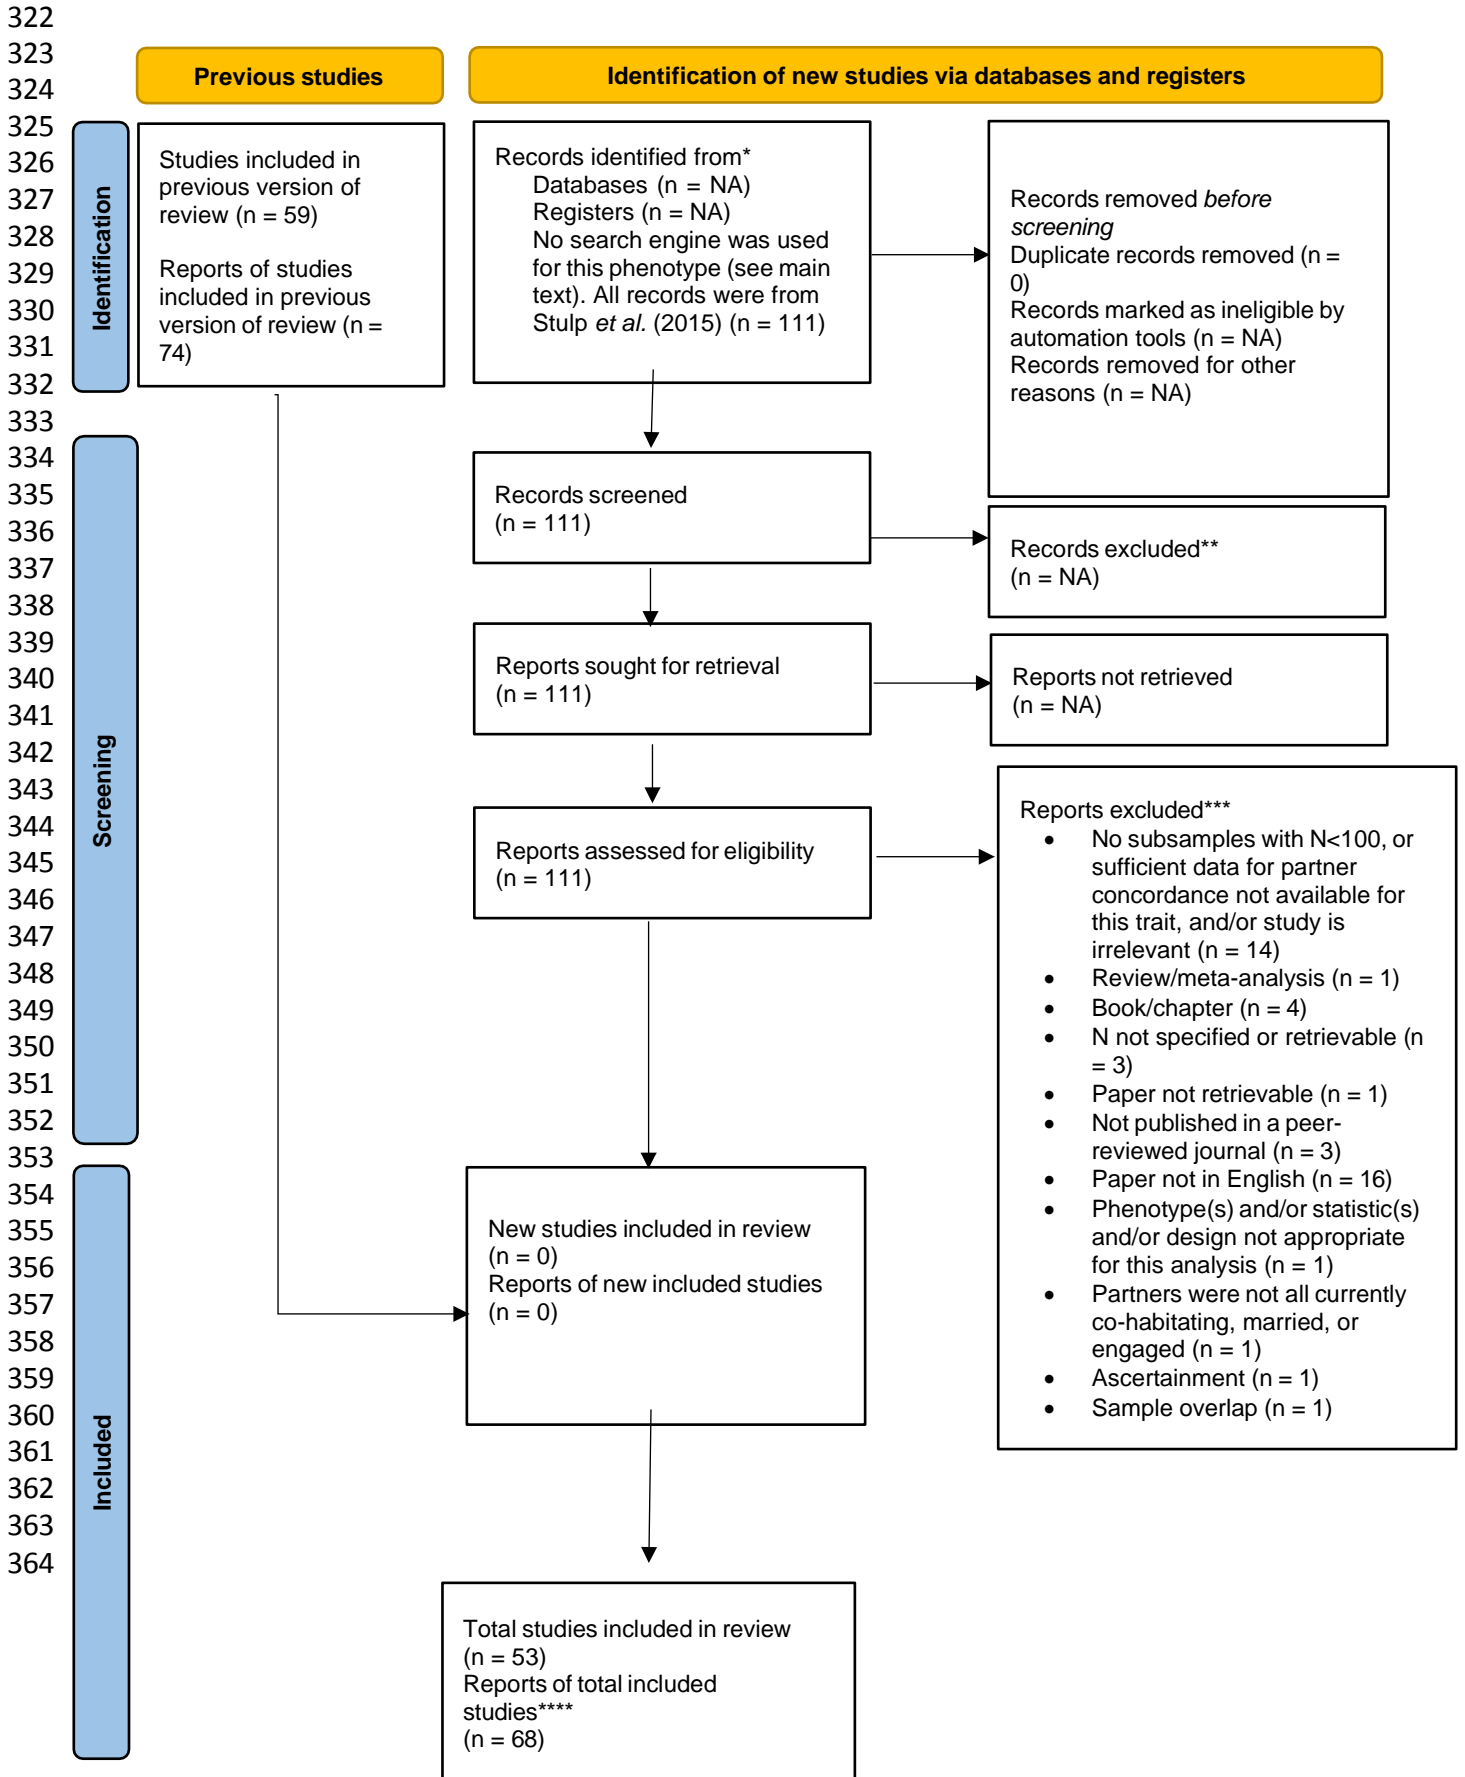



Body mass index

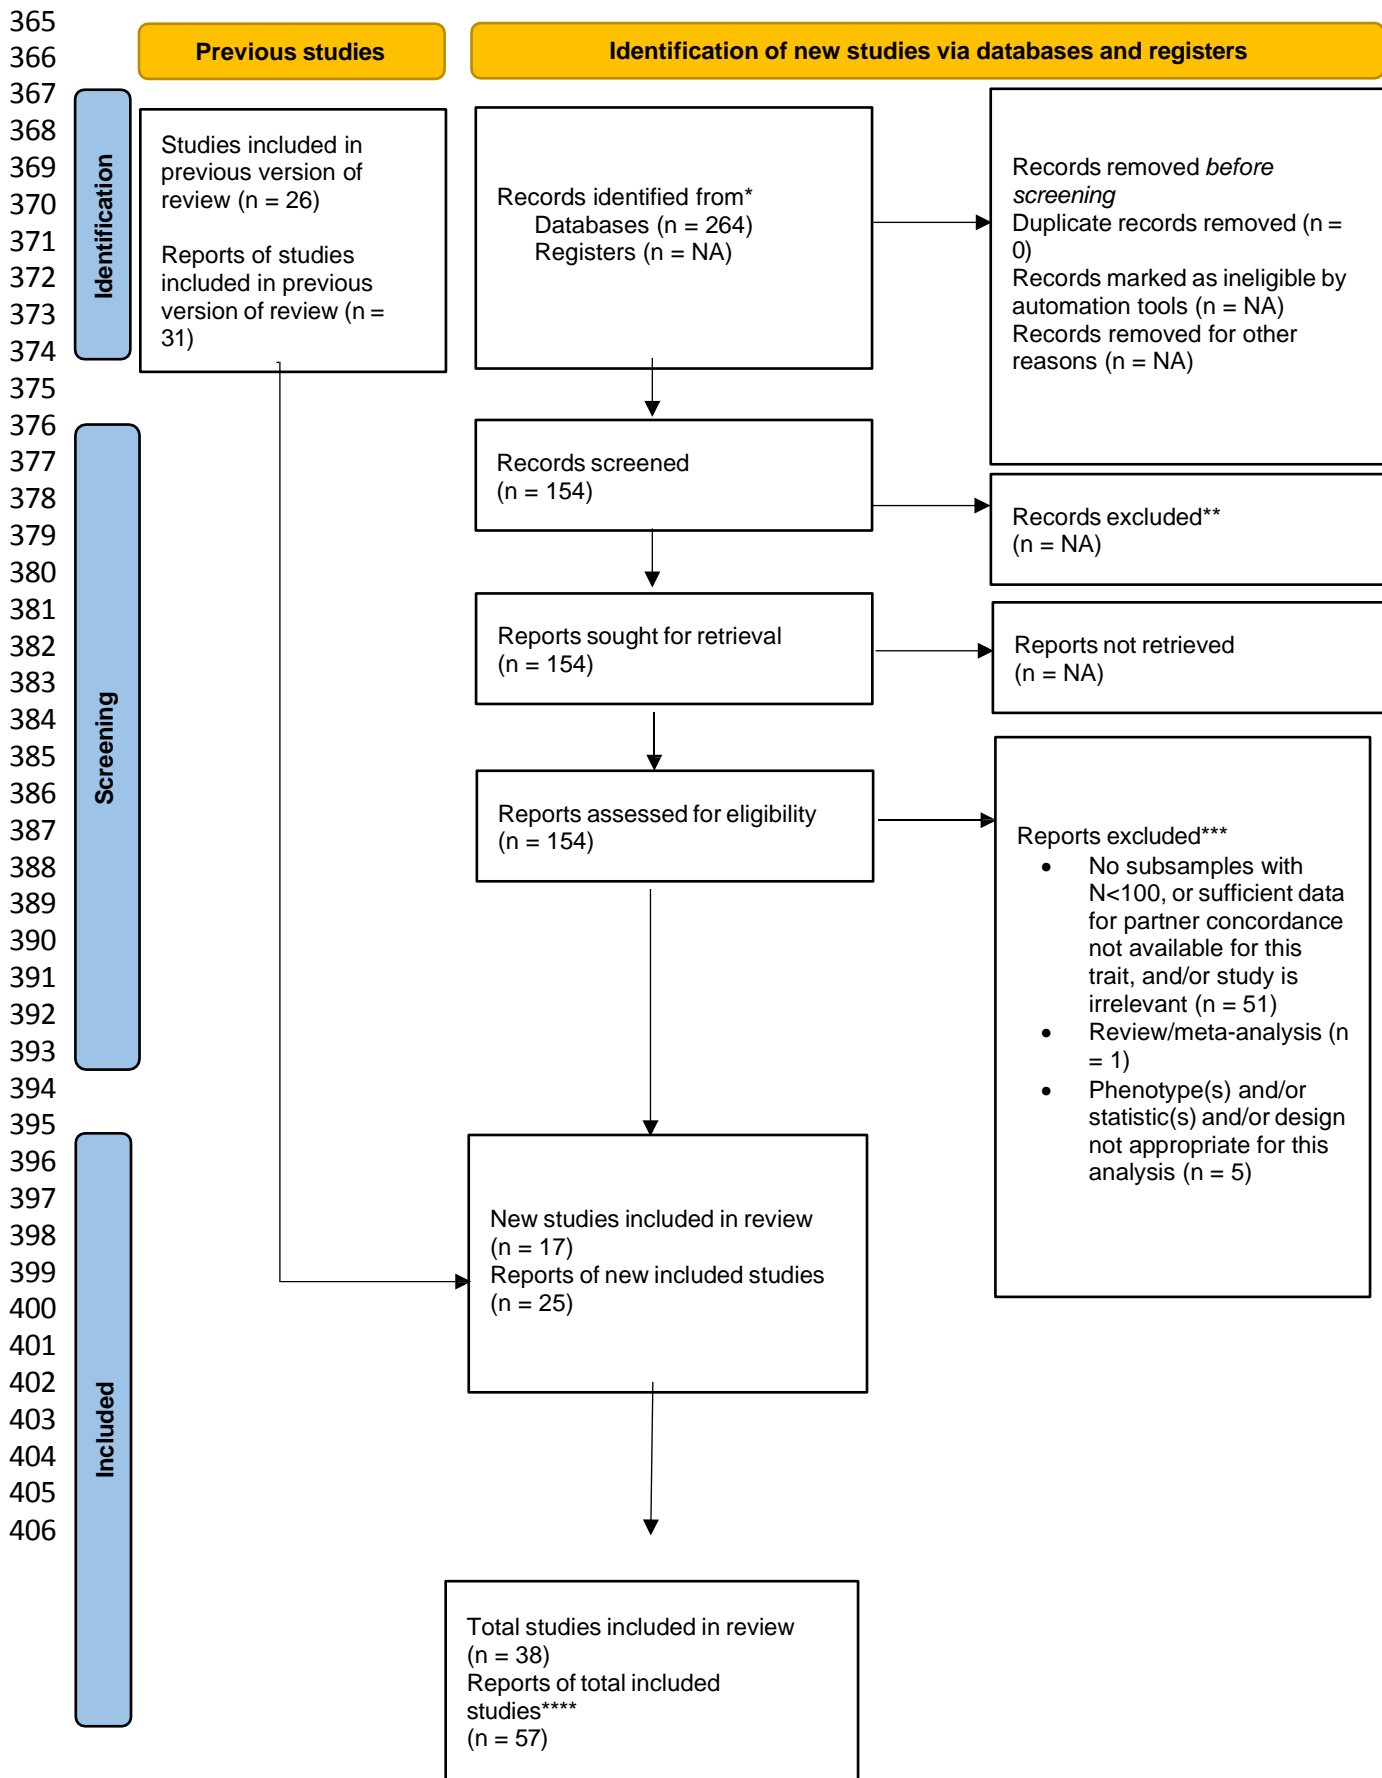

## Extraversion

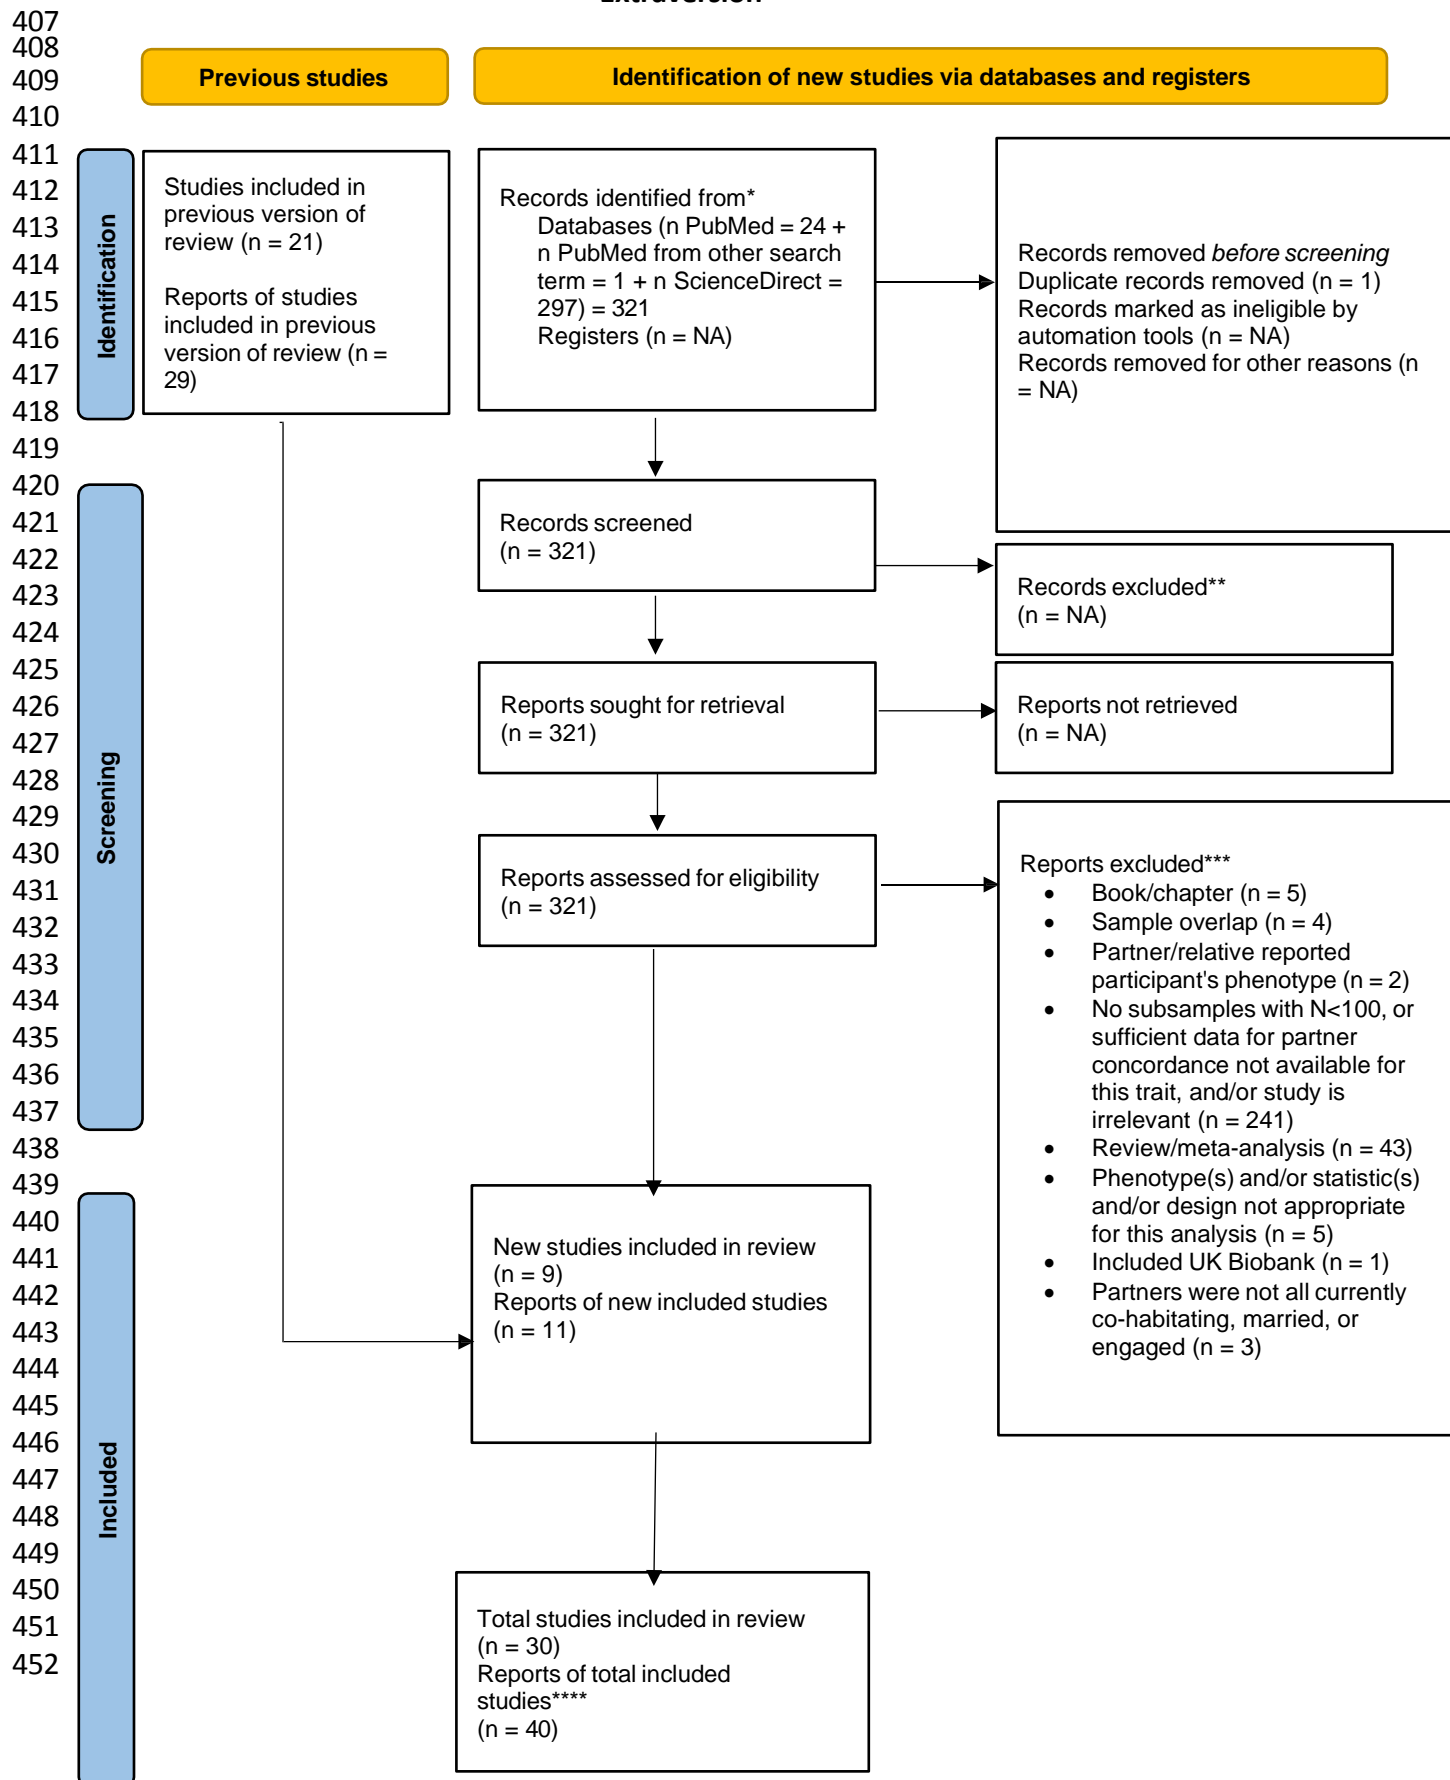

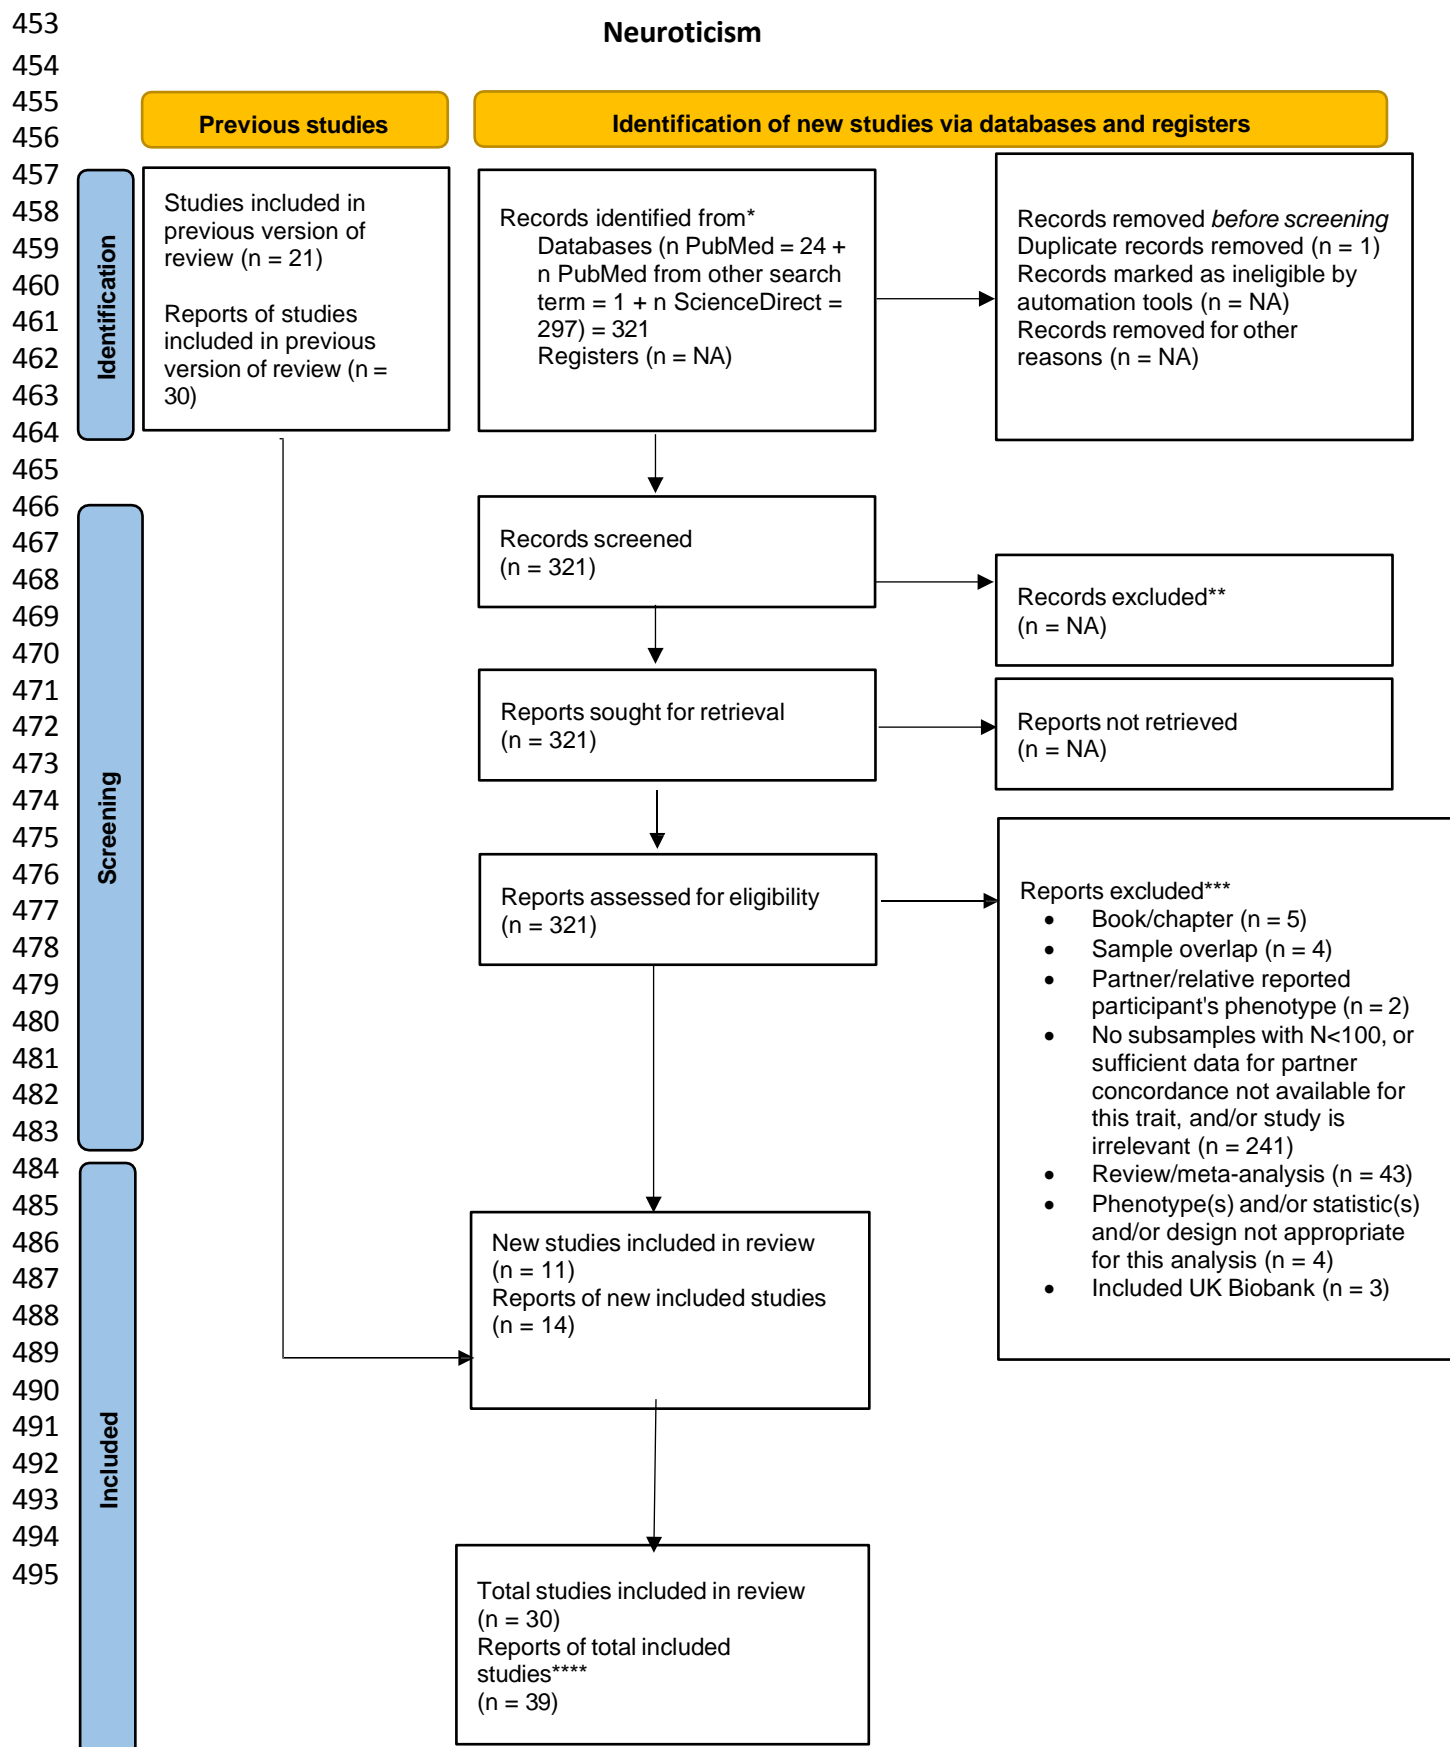

## Openness

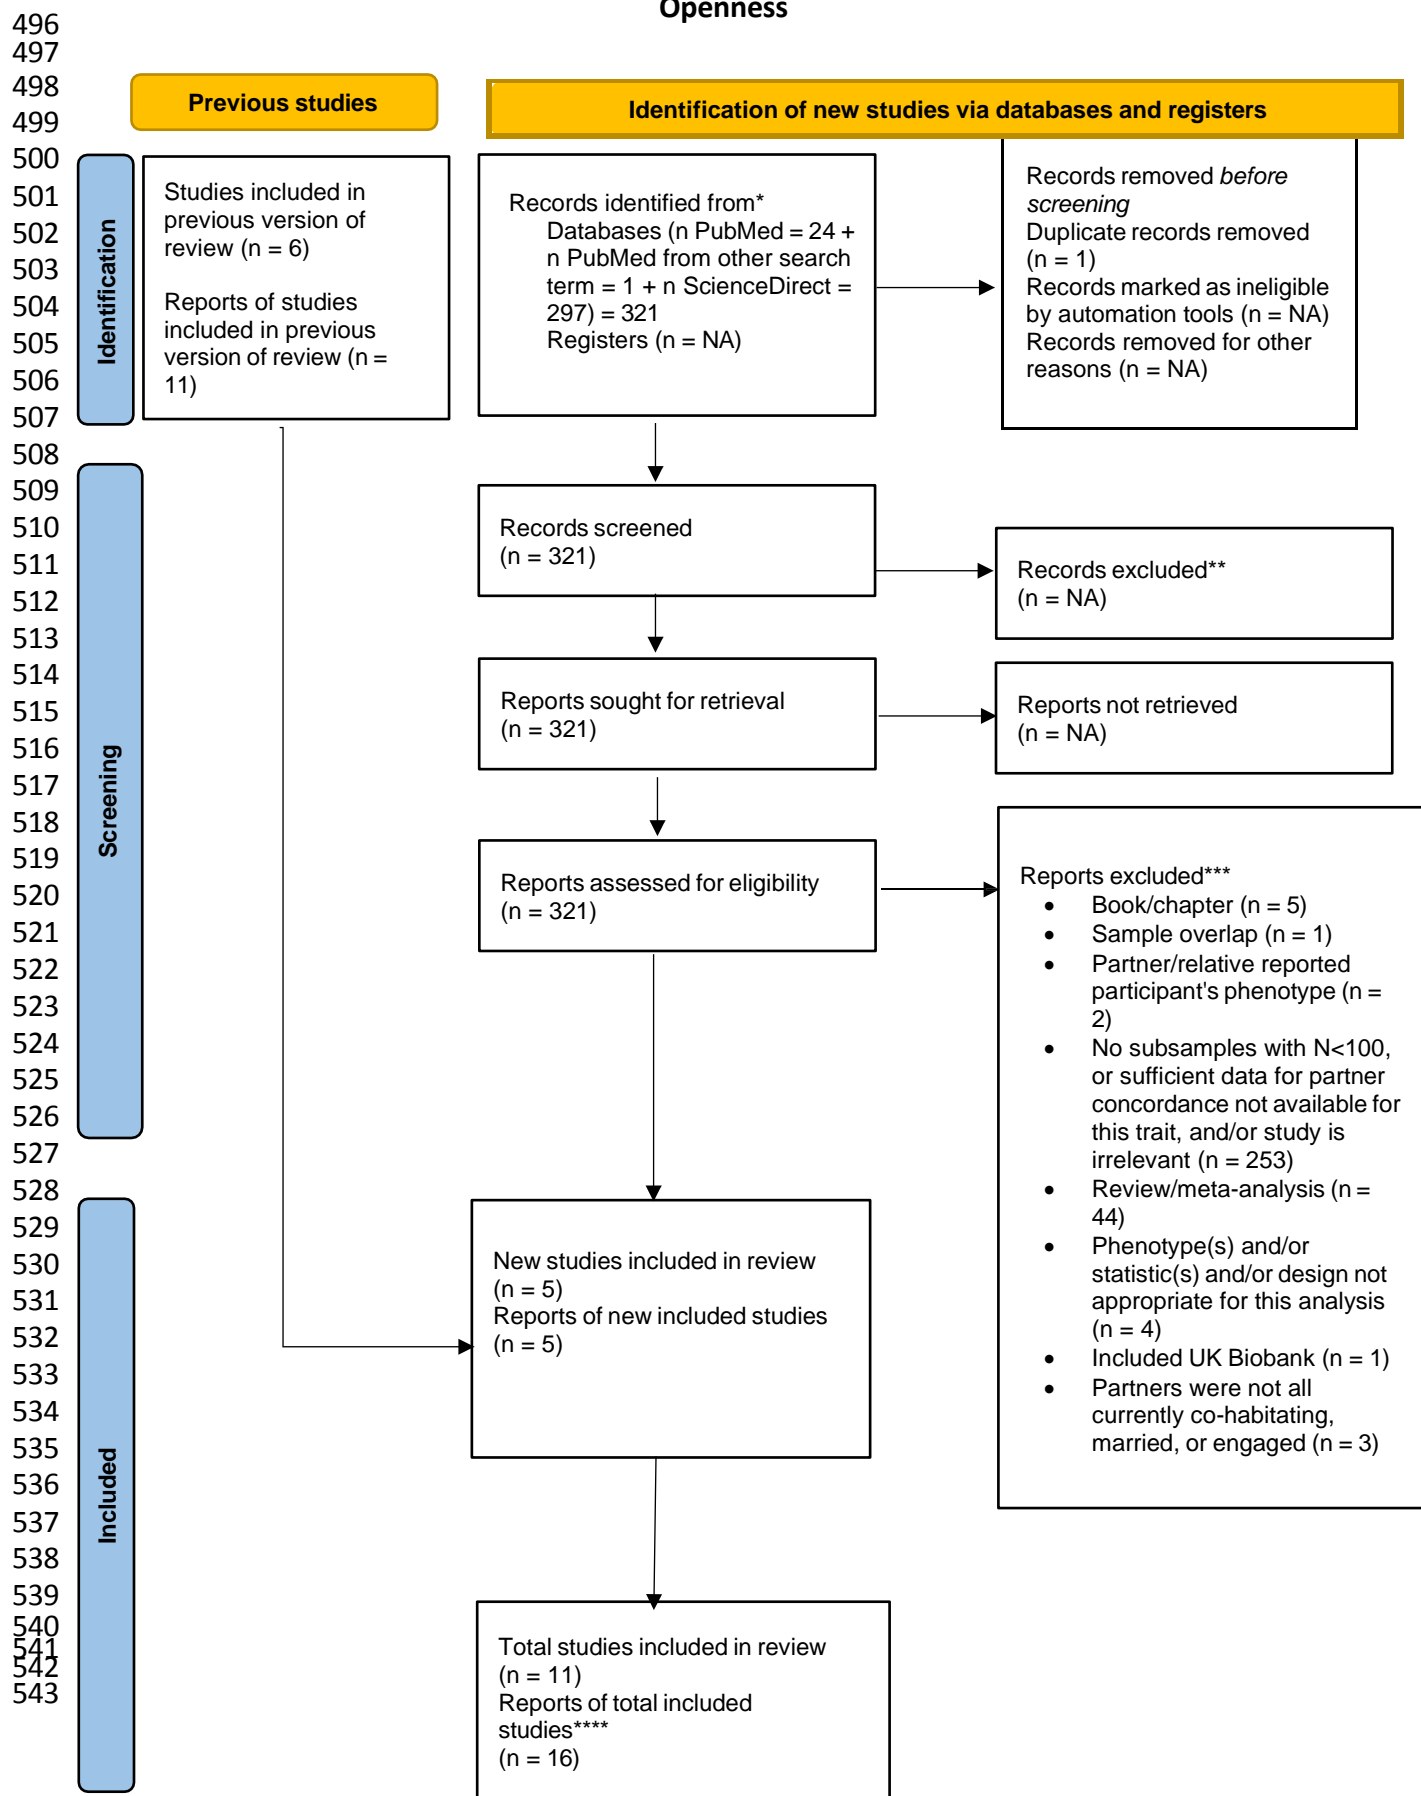

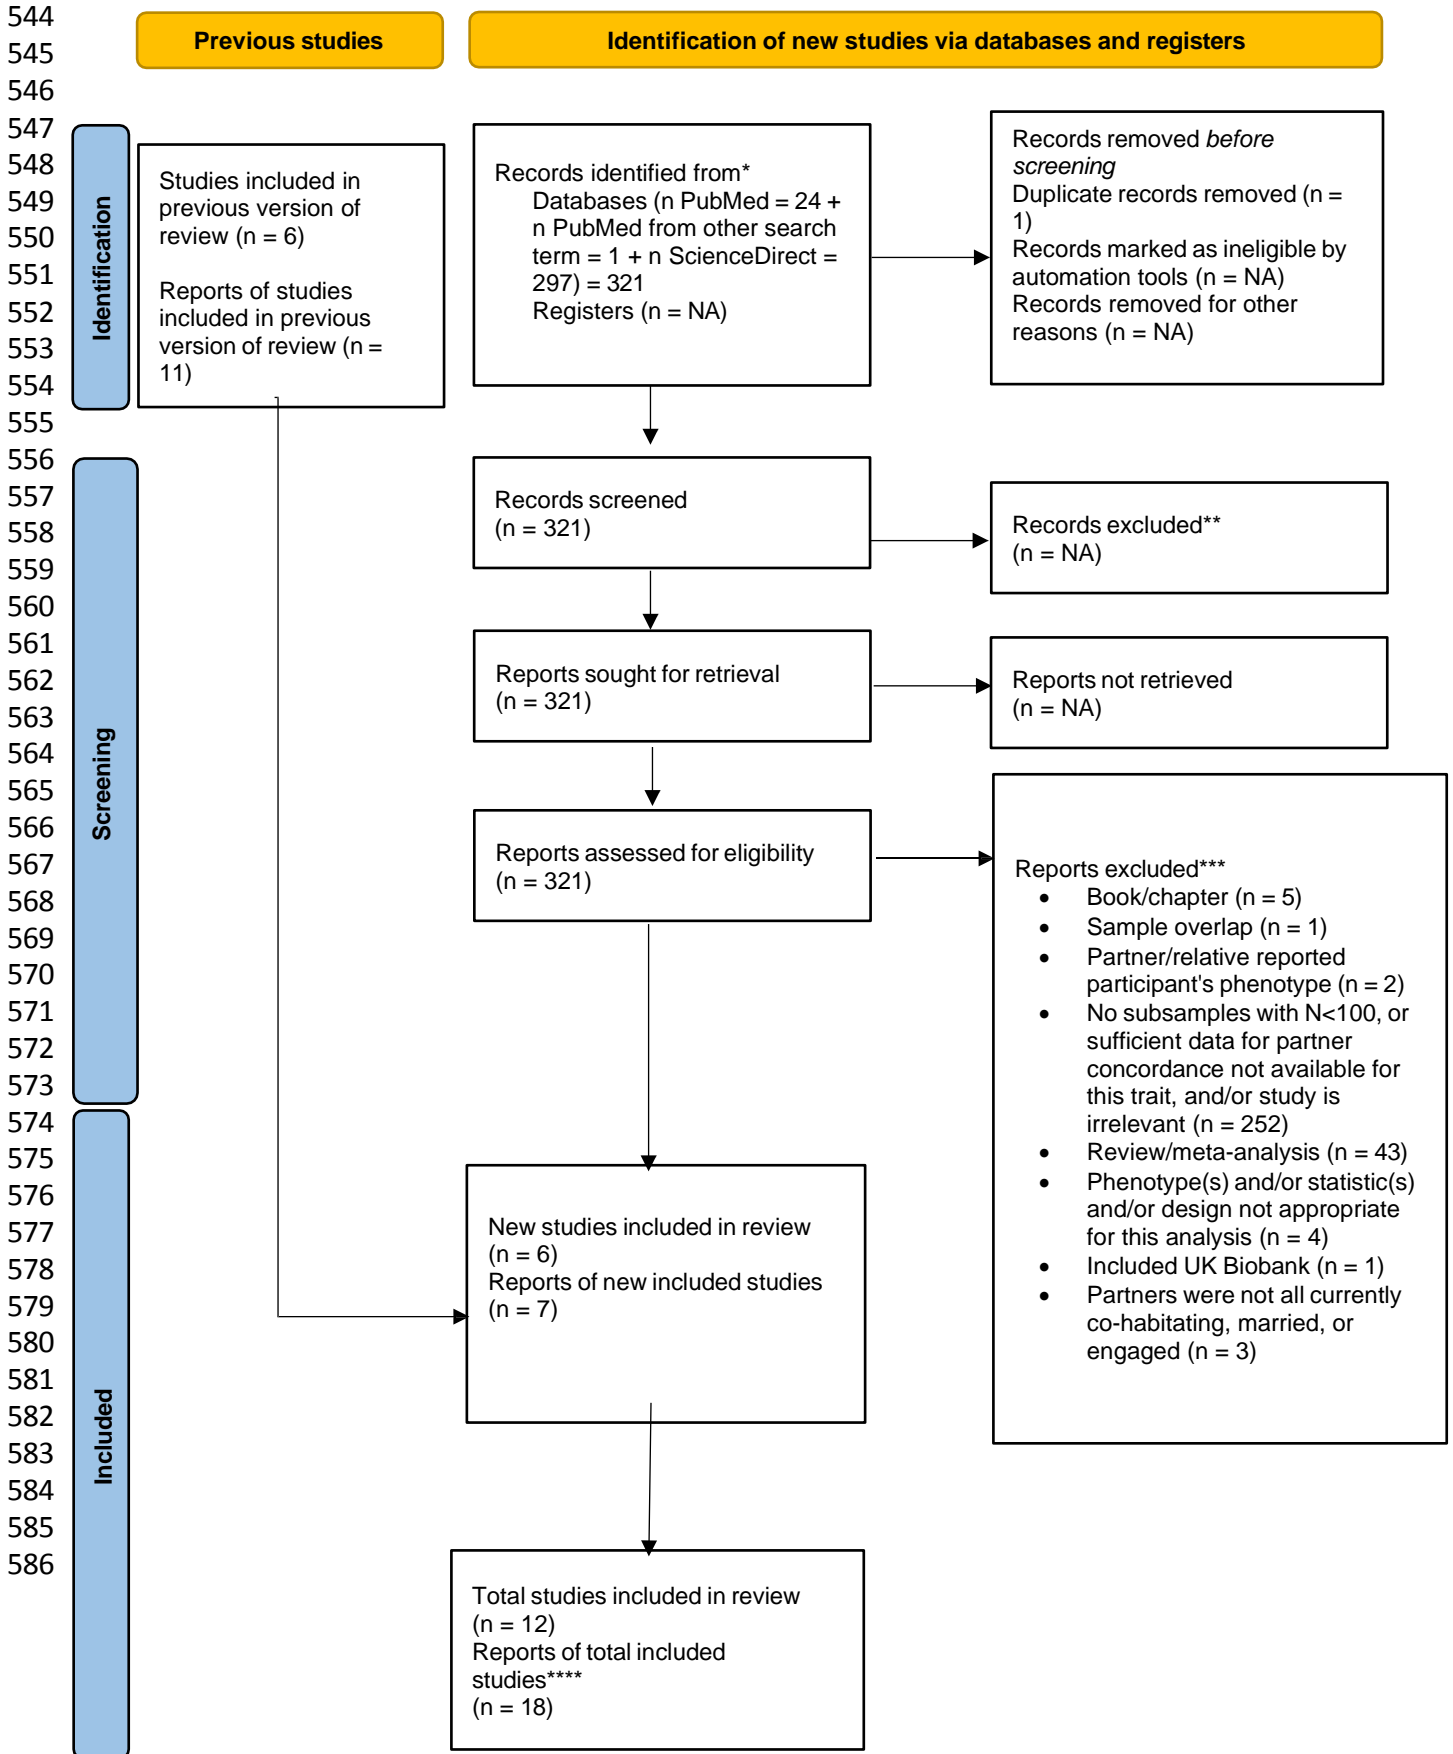

Agreeableness

587  
588  
589  
590  
591  
592  
593  
594  
595  
596  
597  
598  
599  
600  
601  
602  
603  
604  
605  
606  
607  
608  
609  
610  
611  
612  
613  
614  
615  
616  
617  
618  
619  
620  
621  
622  
623  
624  
625  
626  
627  
628  
629  
630  
631  
632  
633

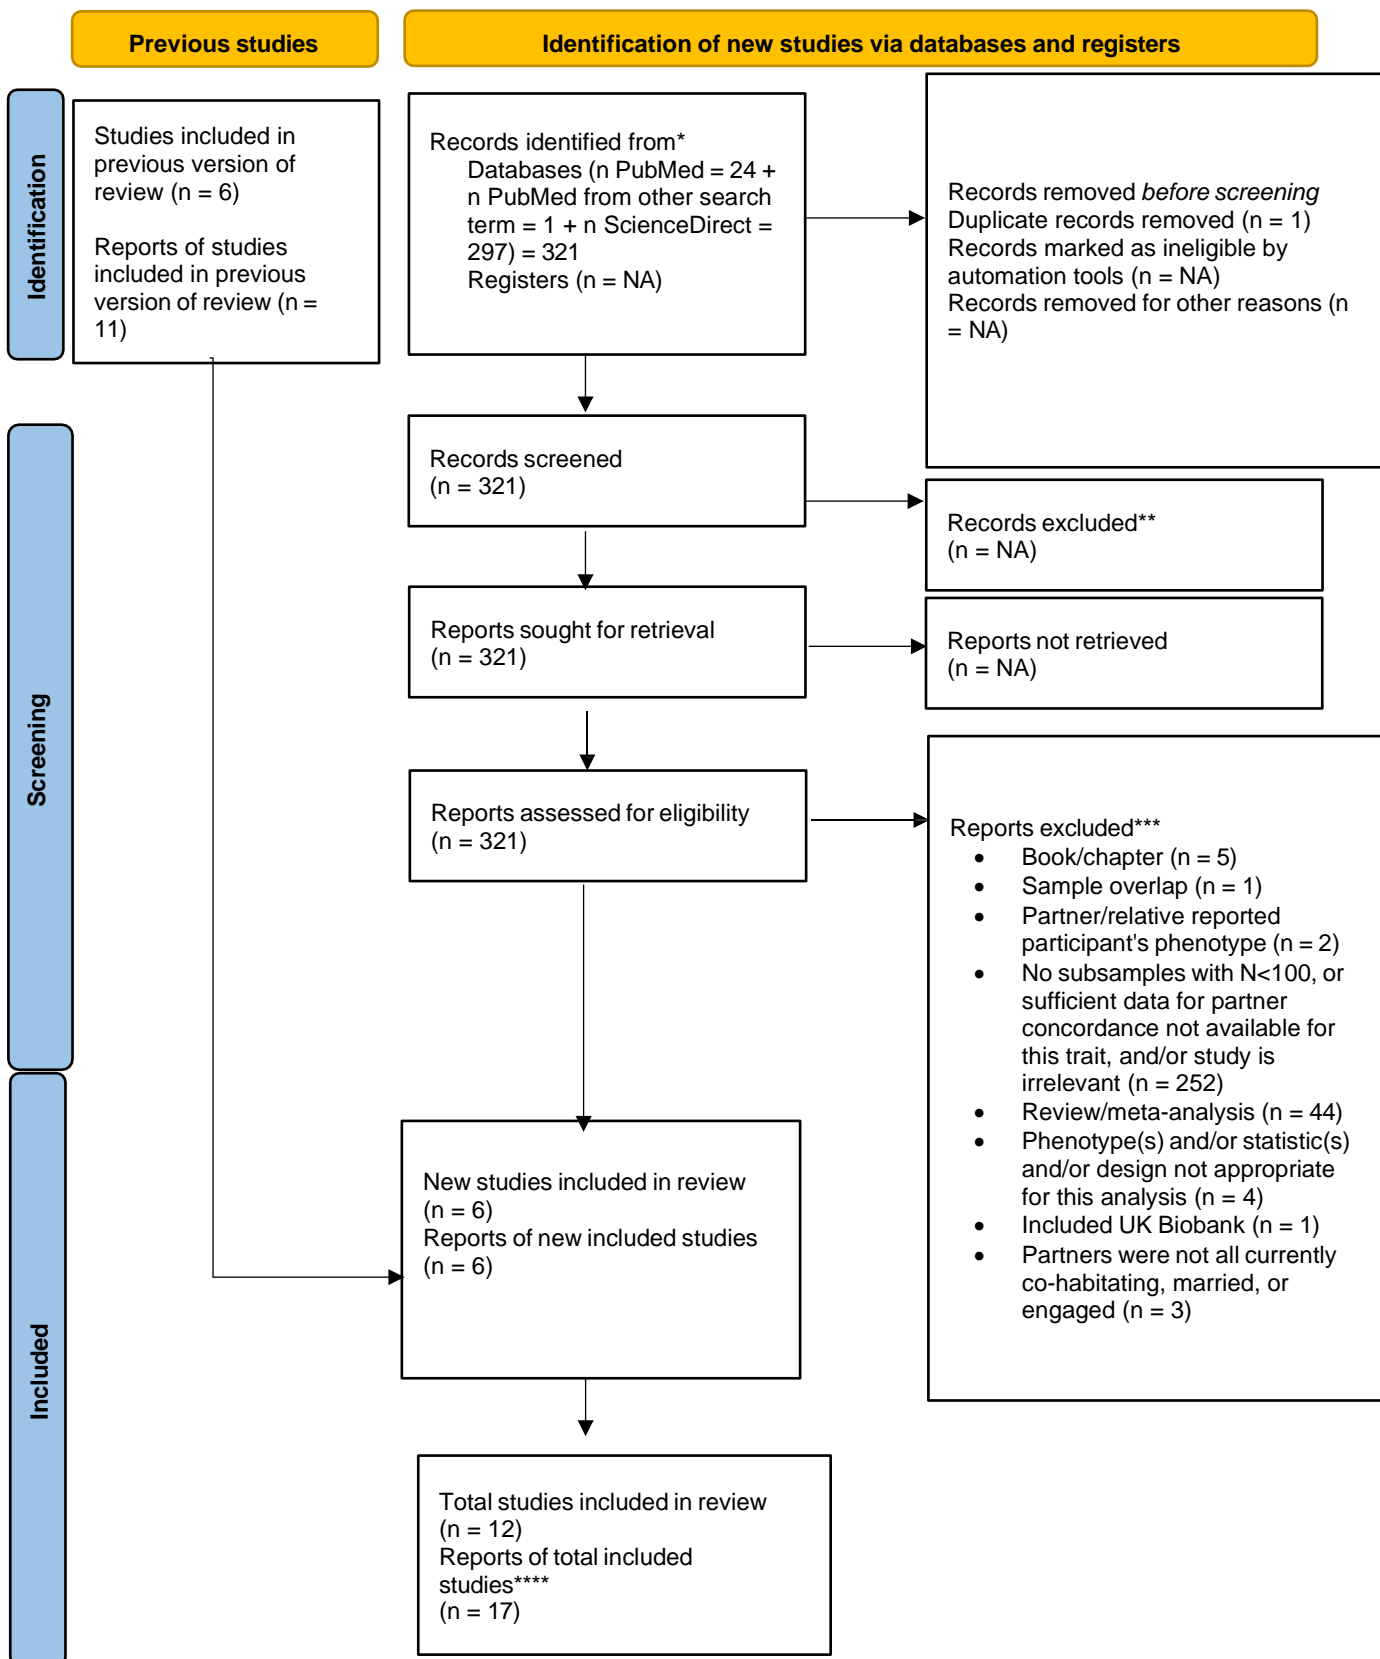

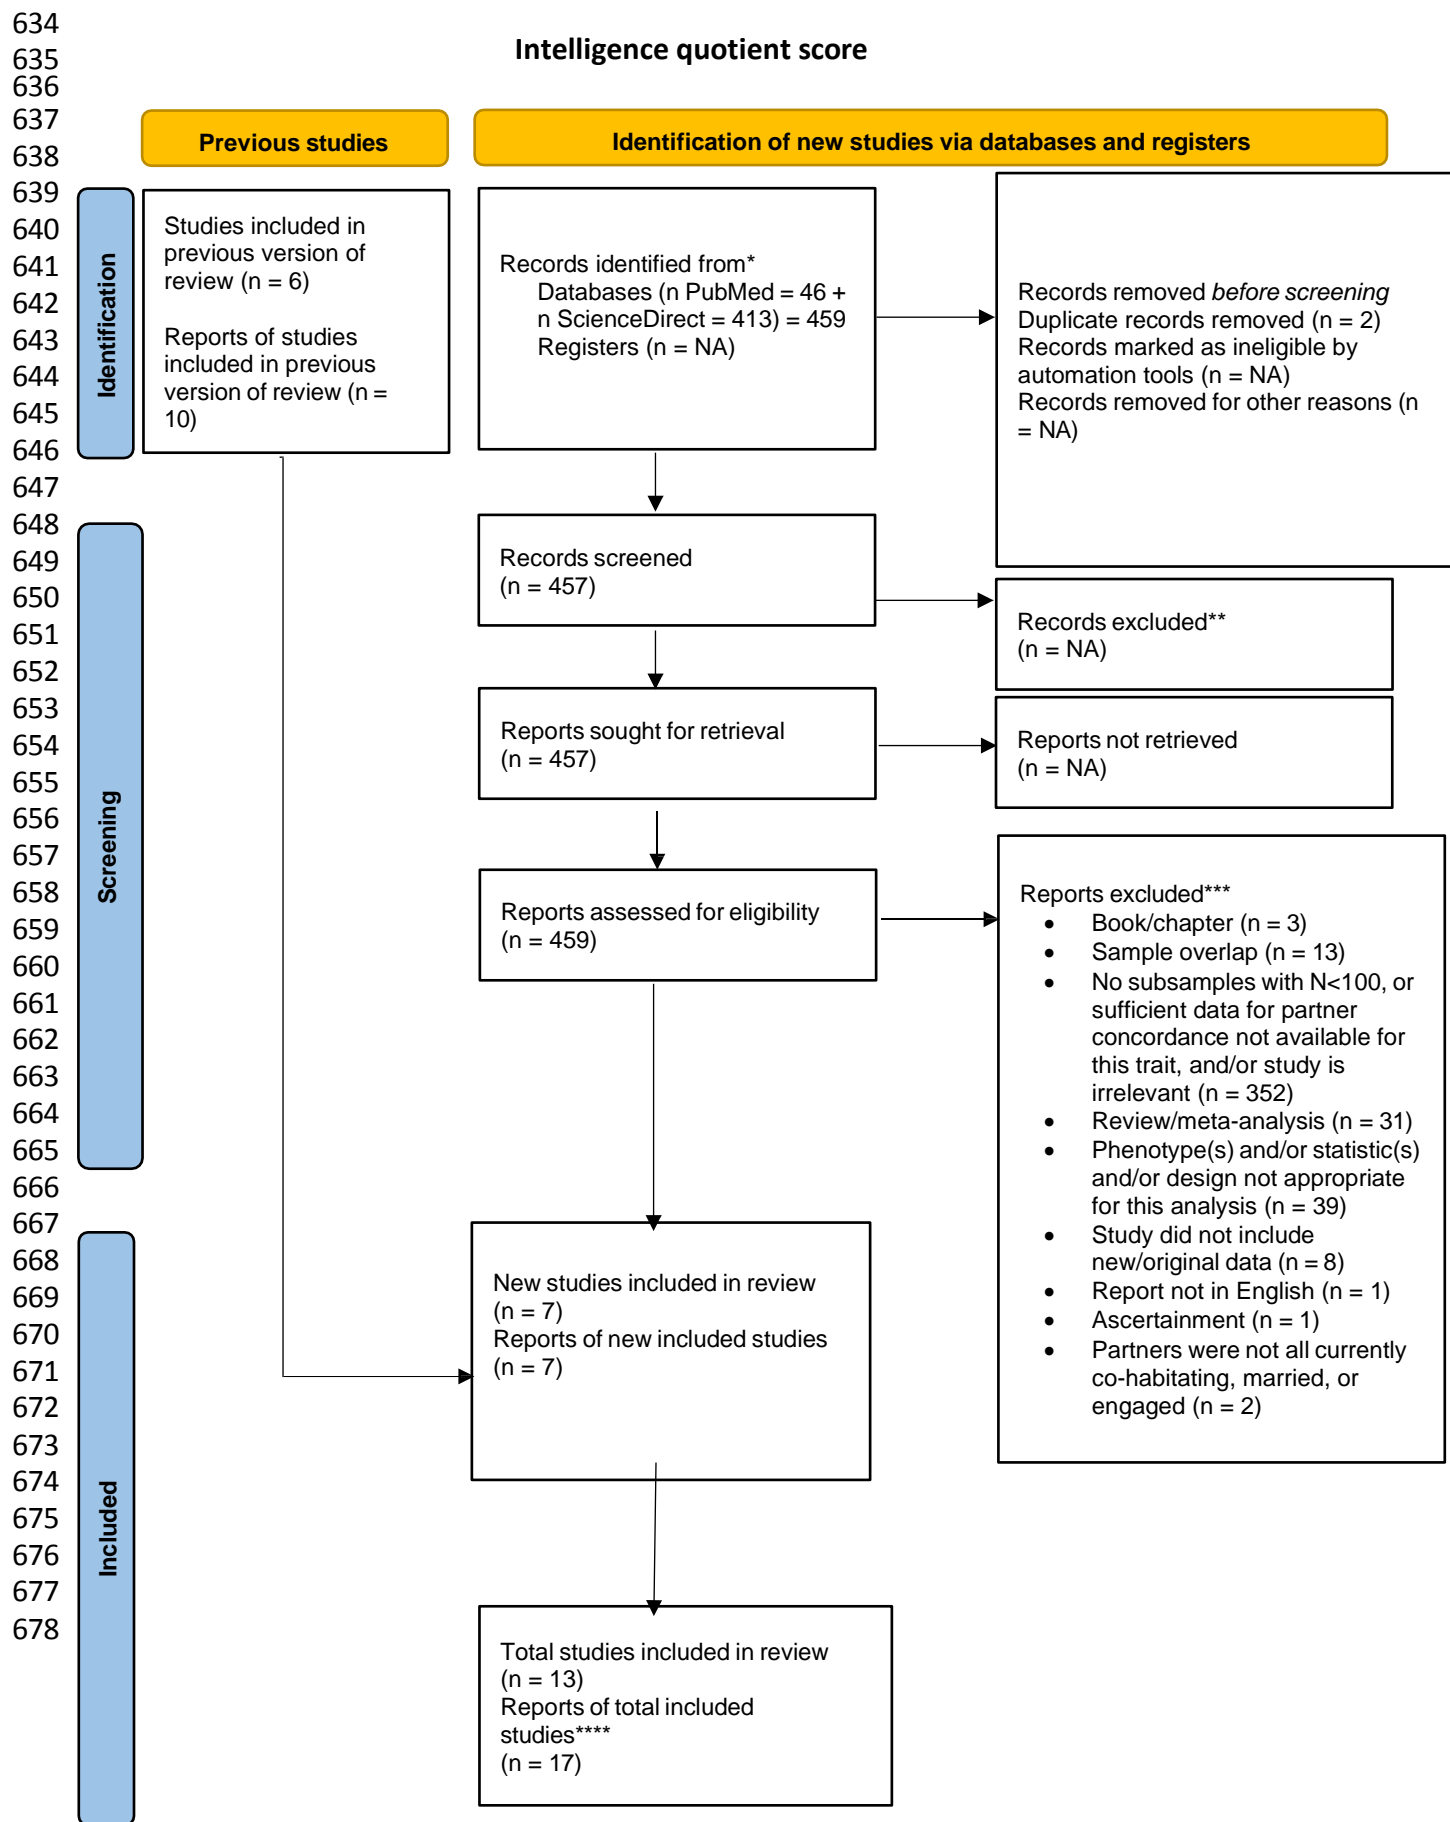

## Diabetes

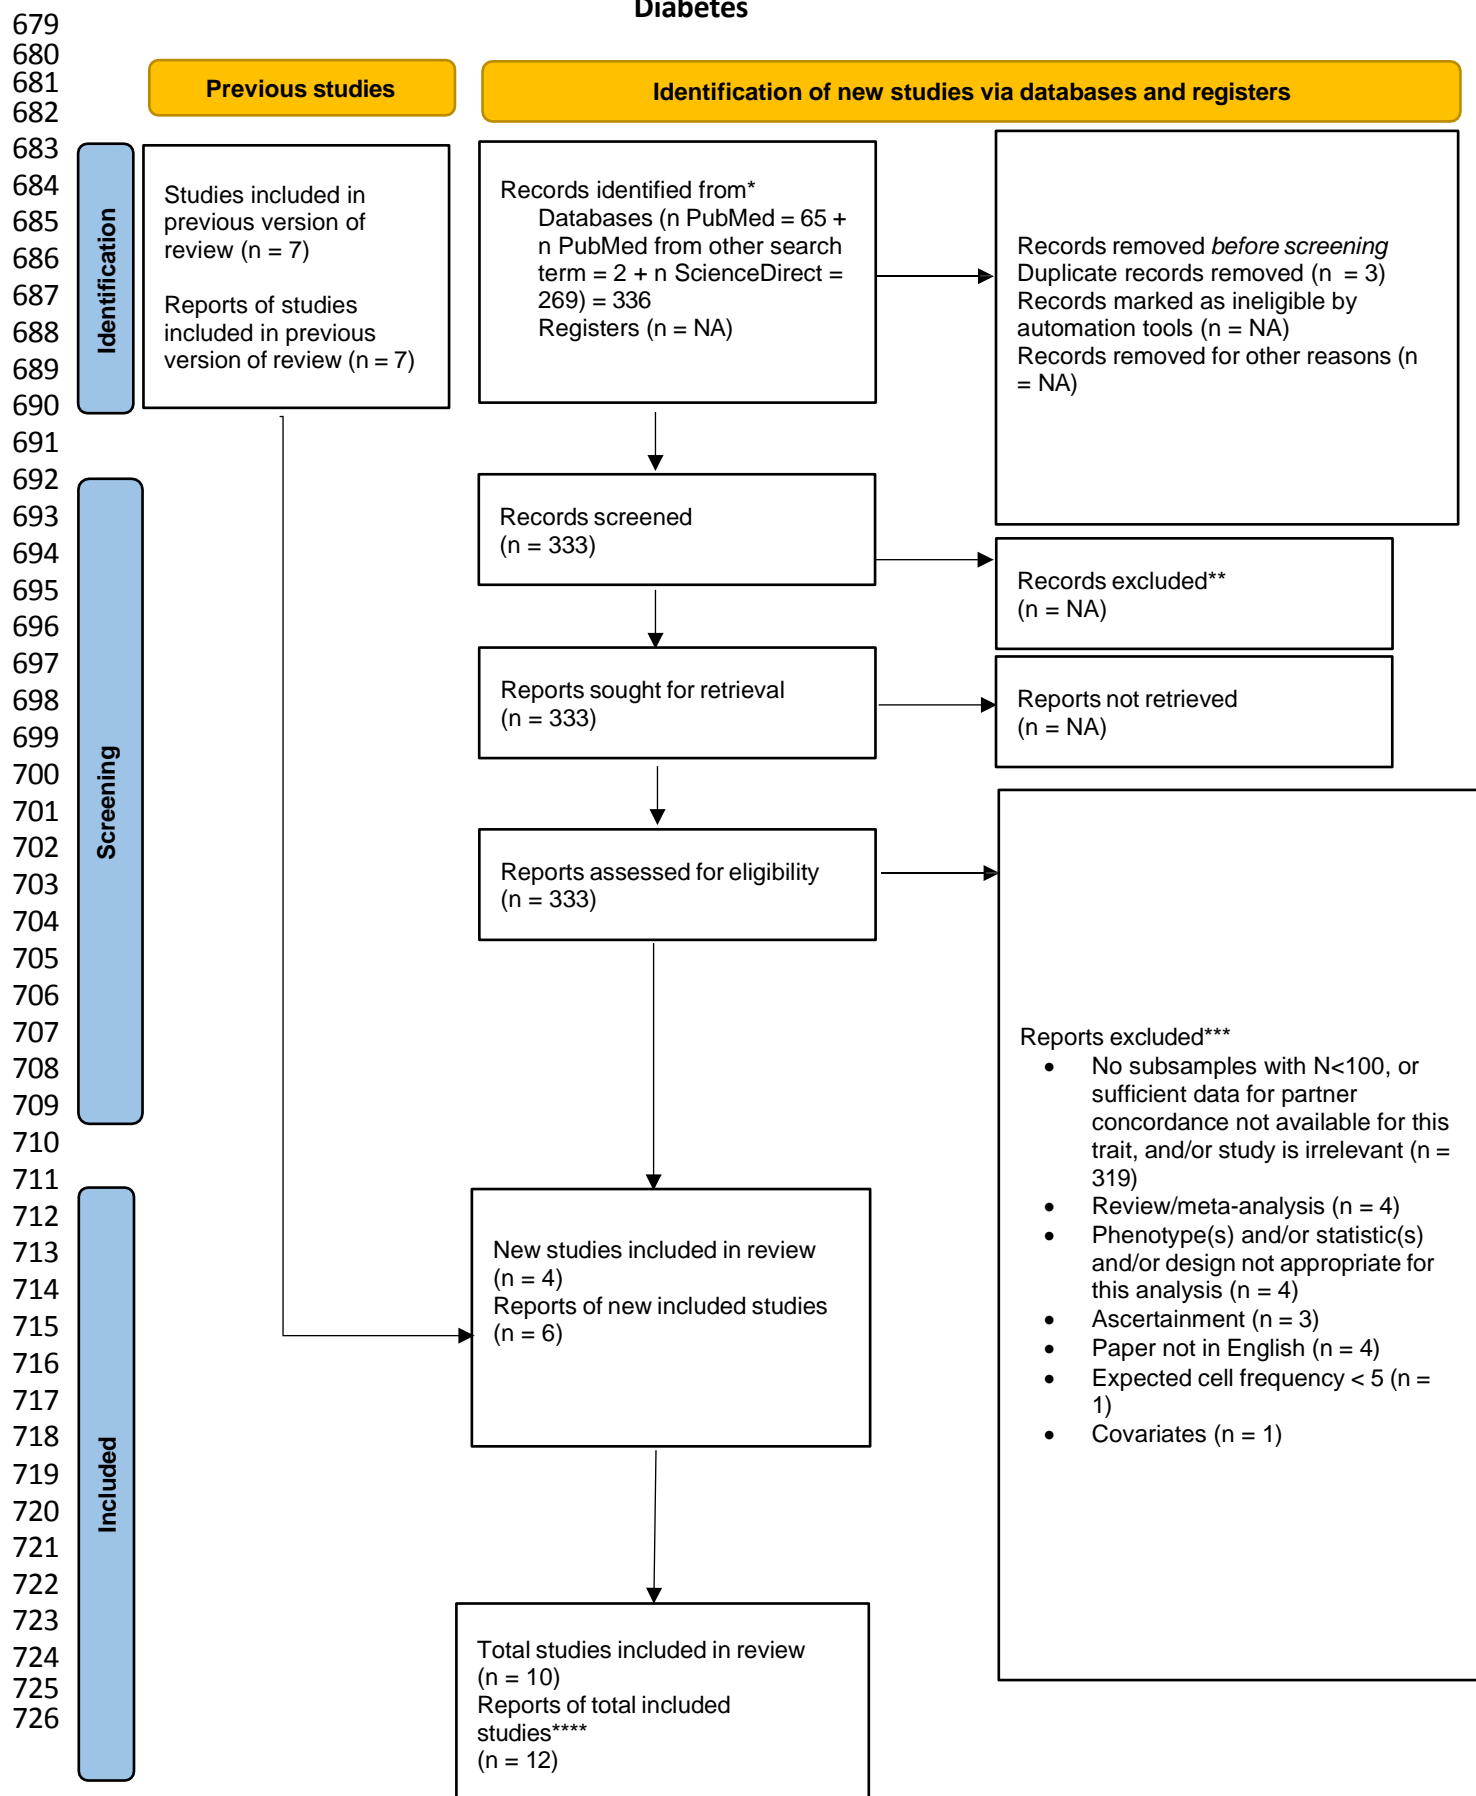



## Educational attainment

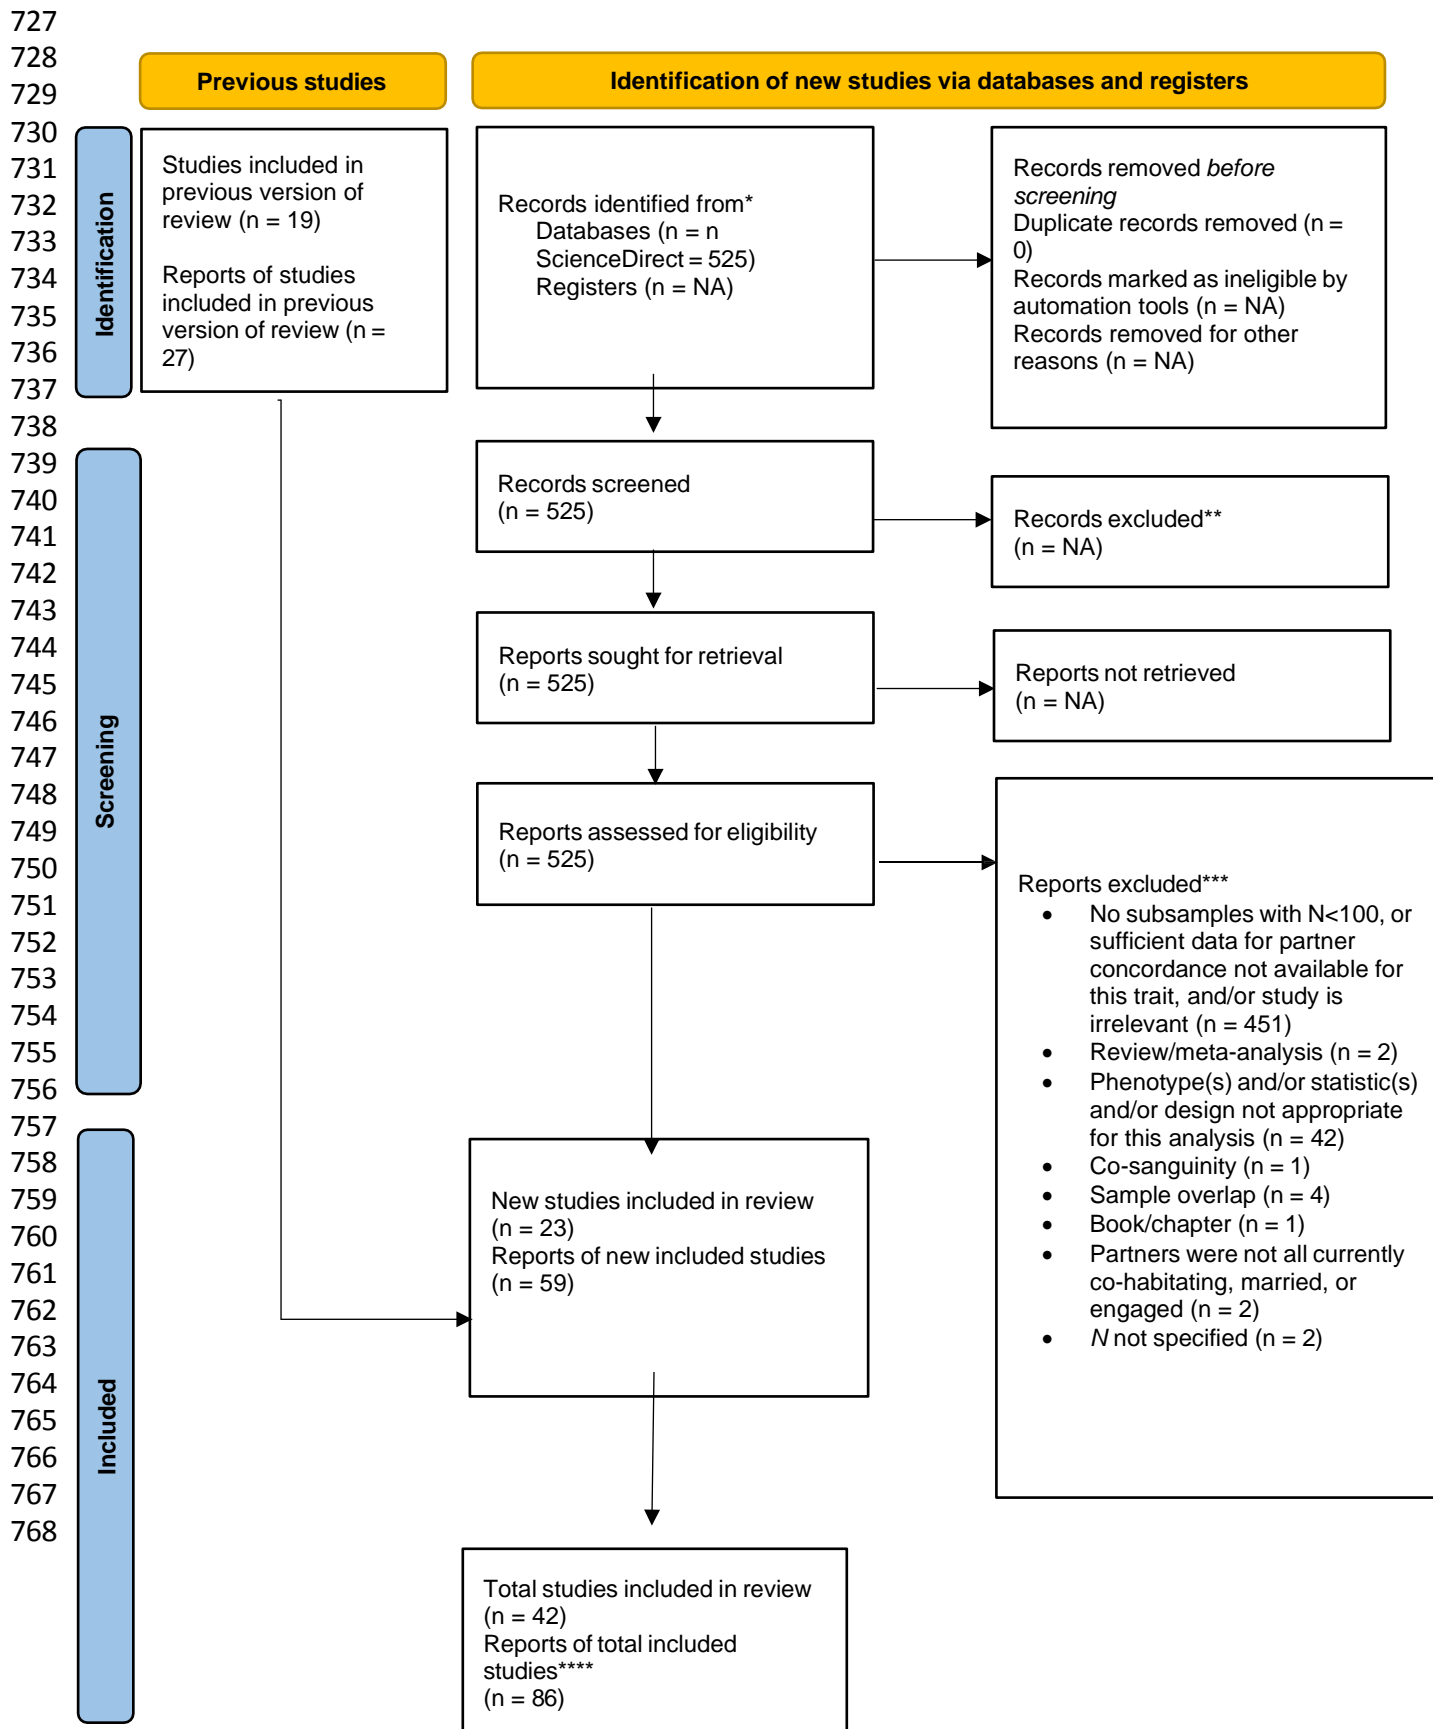

## Smoking status

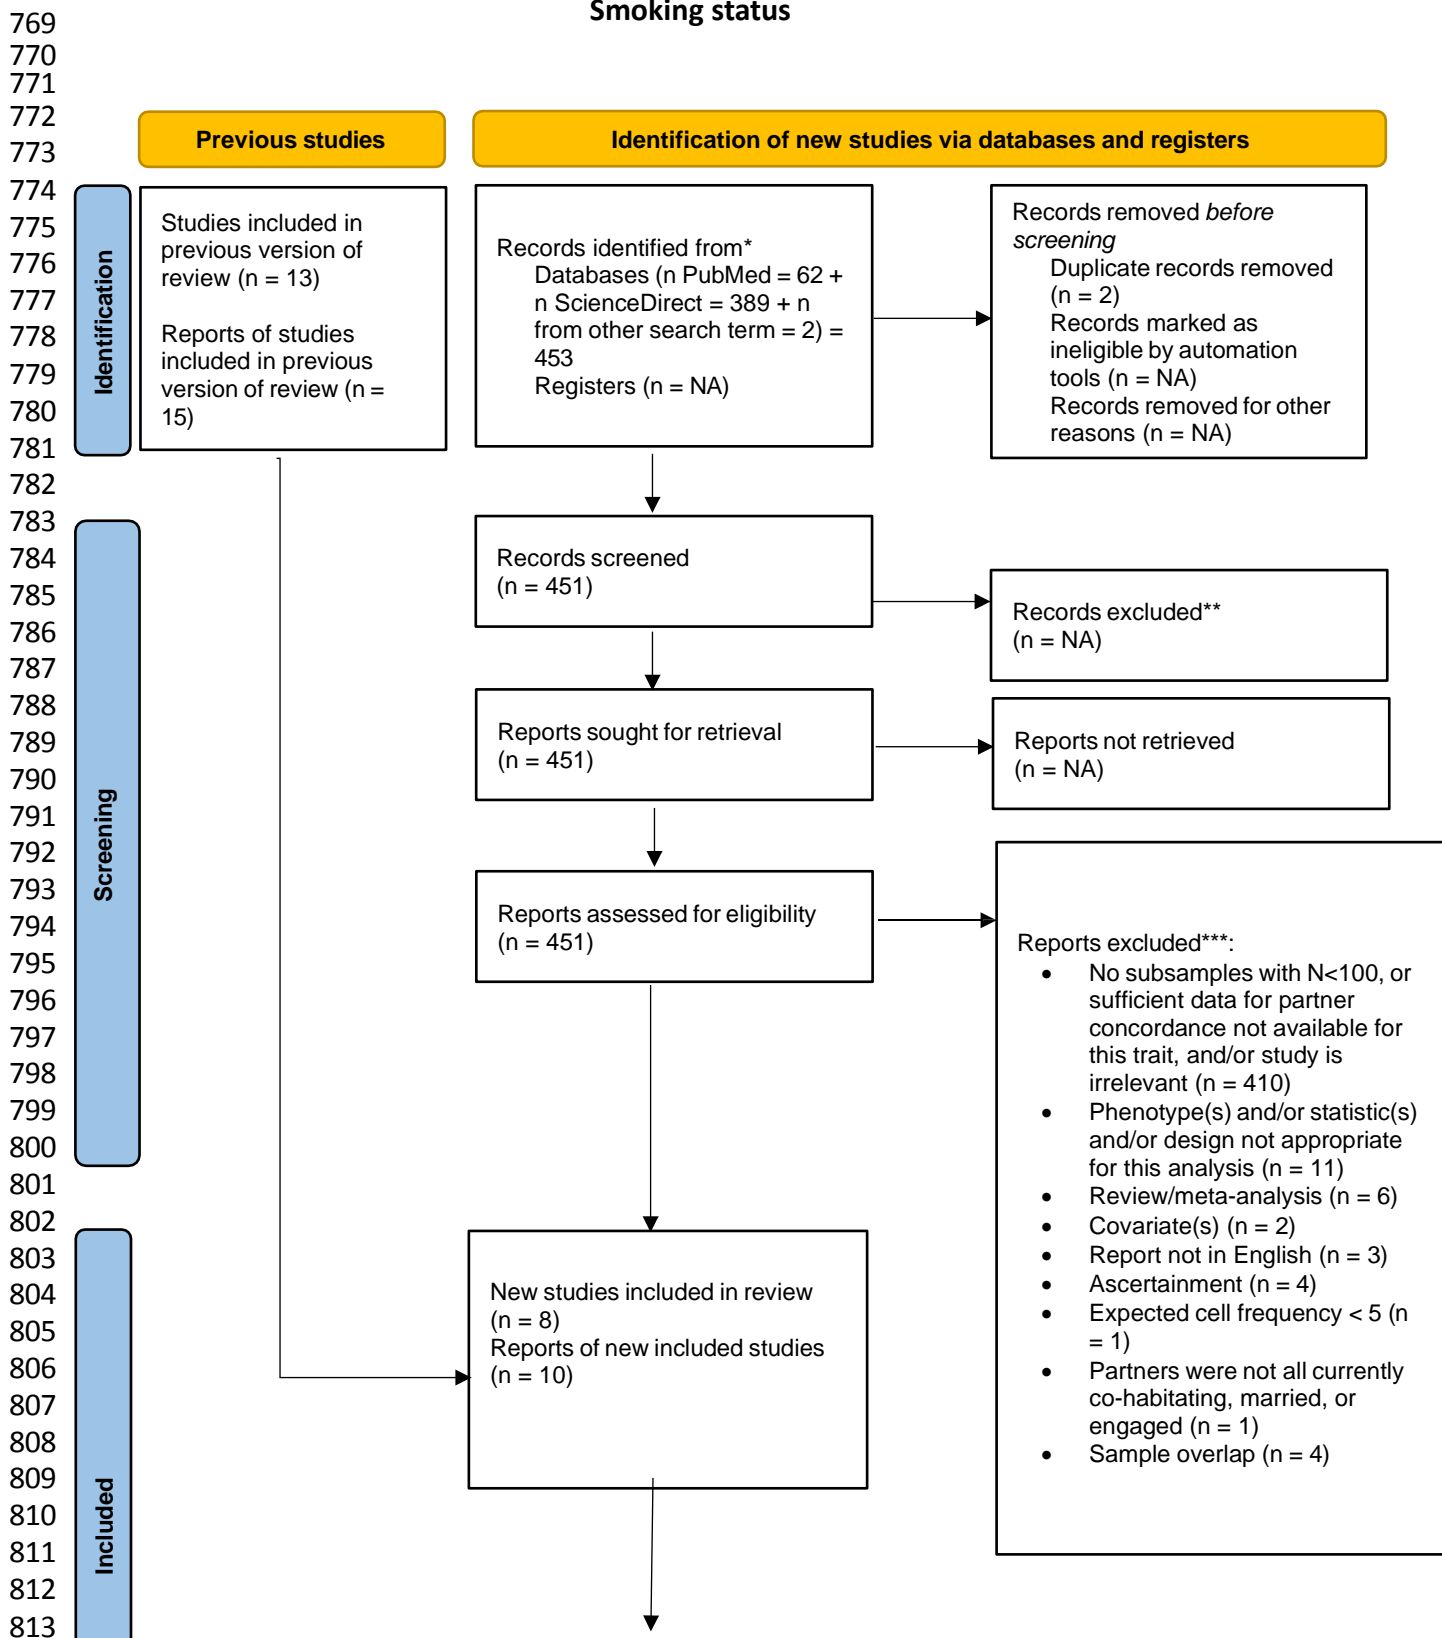

Total studies included in review  
(n = 20)  
Reports of total included  
studies\*\*\*\*  
(n = 27)

## Smoking initiation

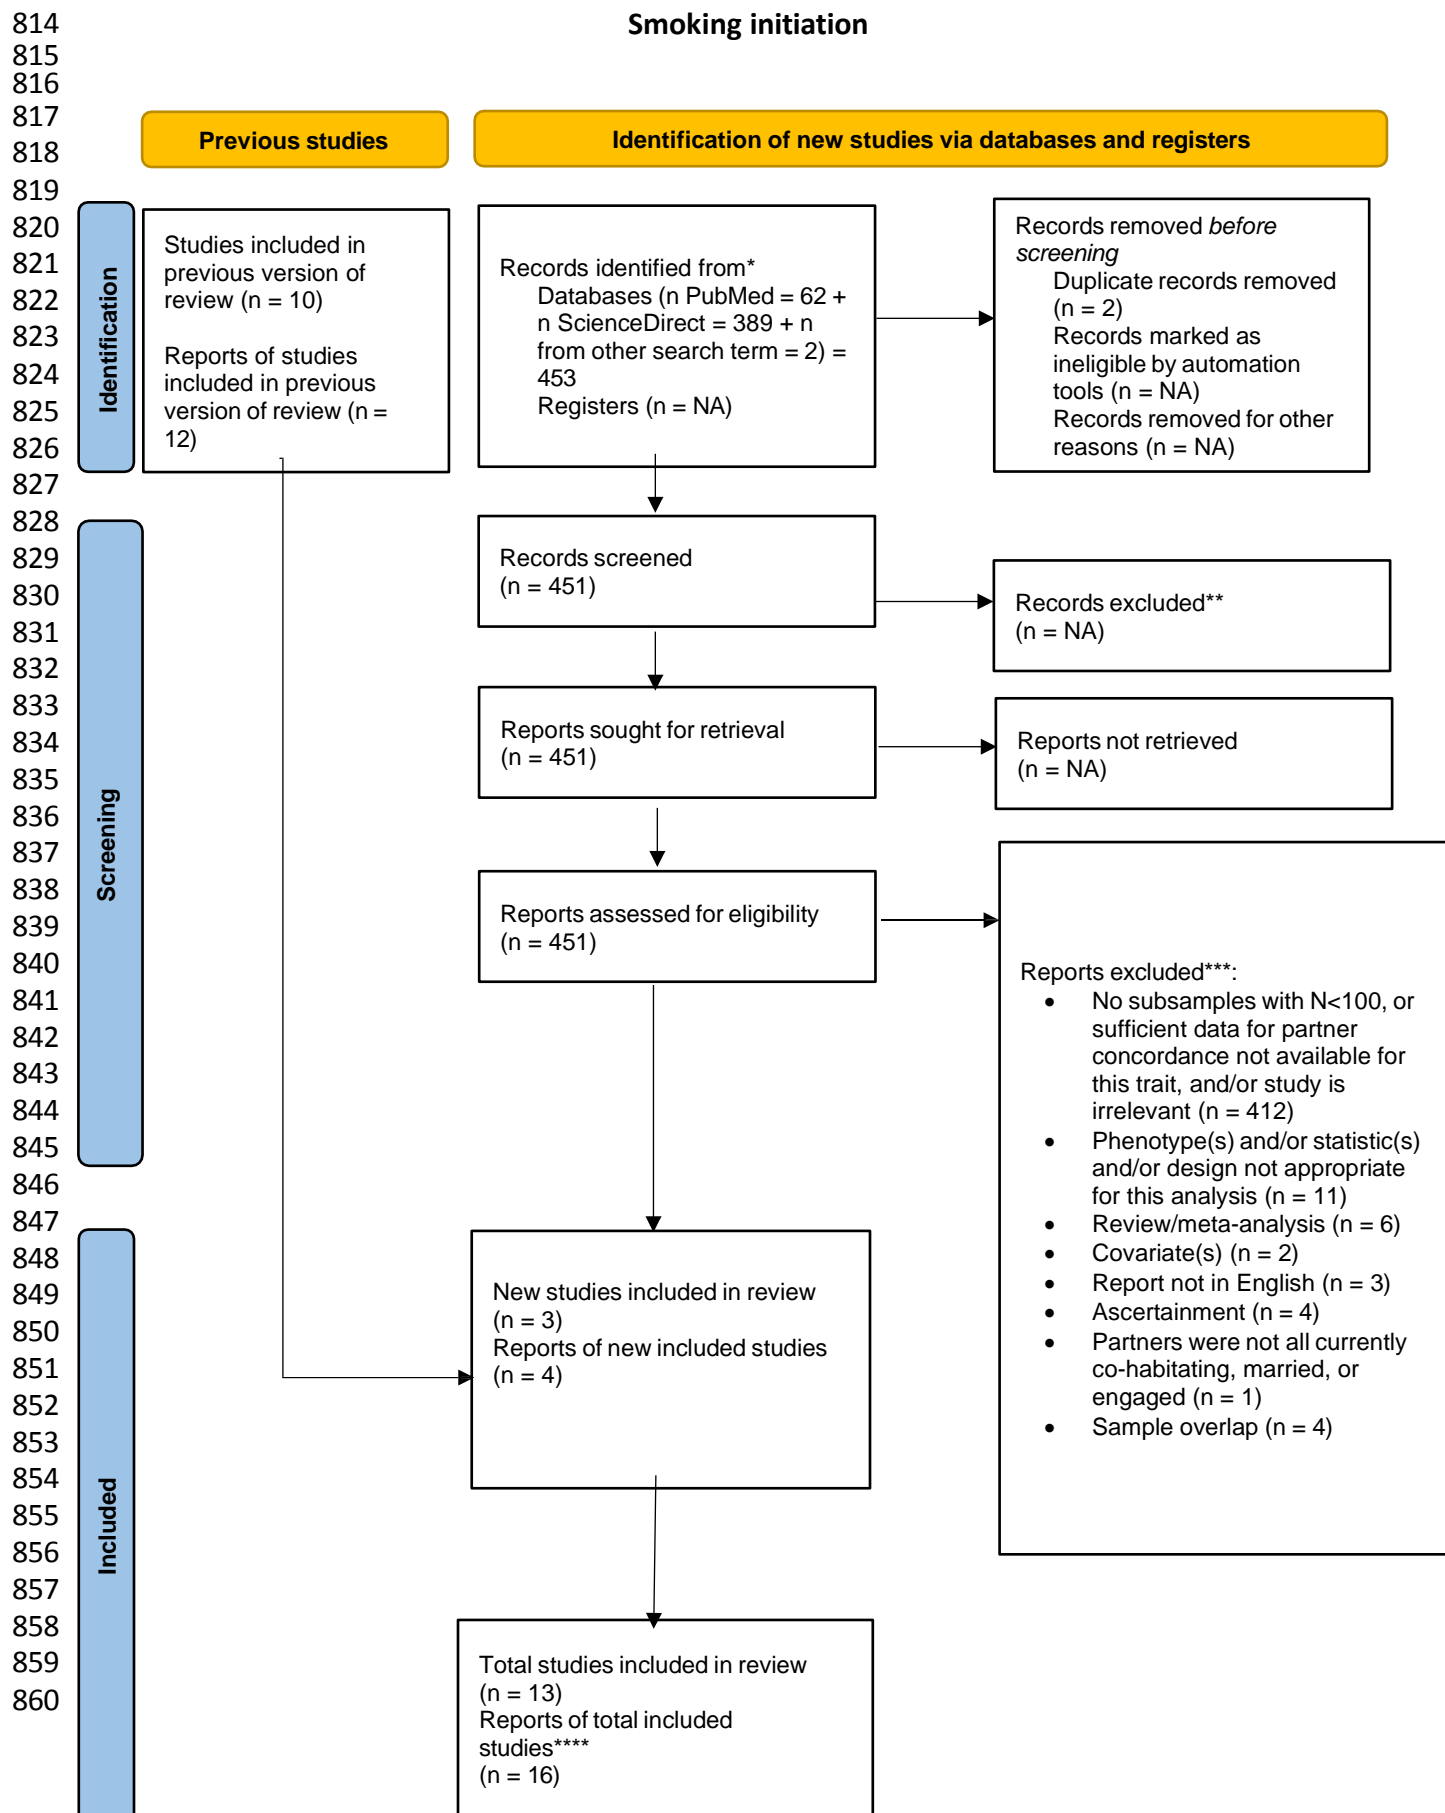

## Smoking cessation

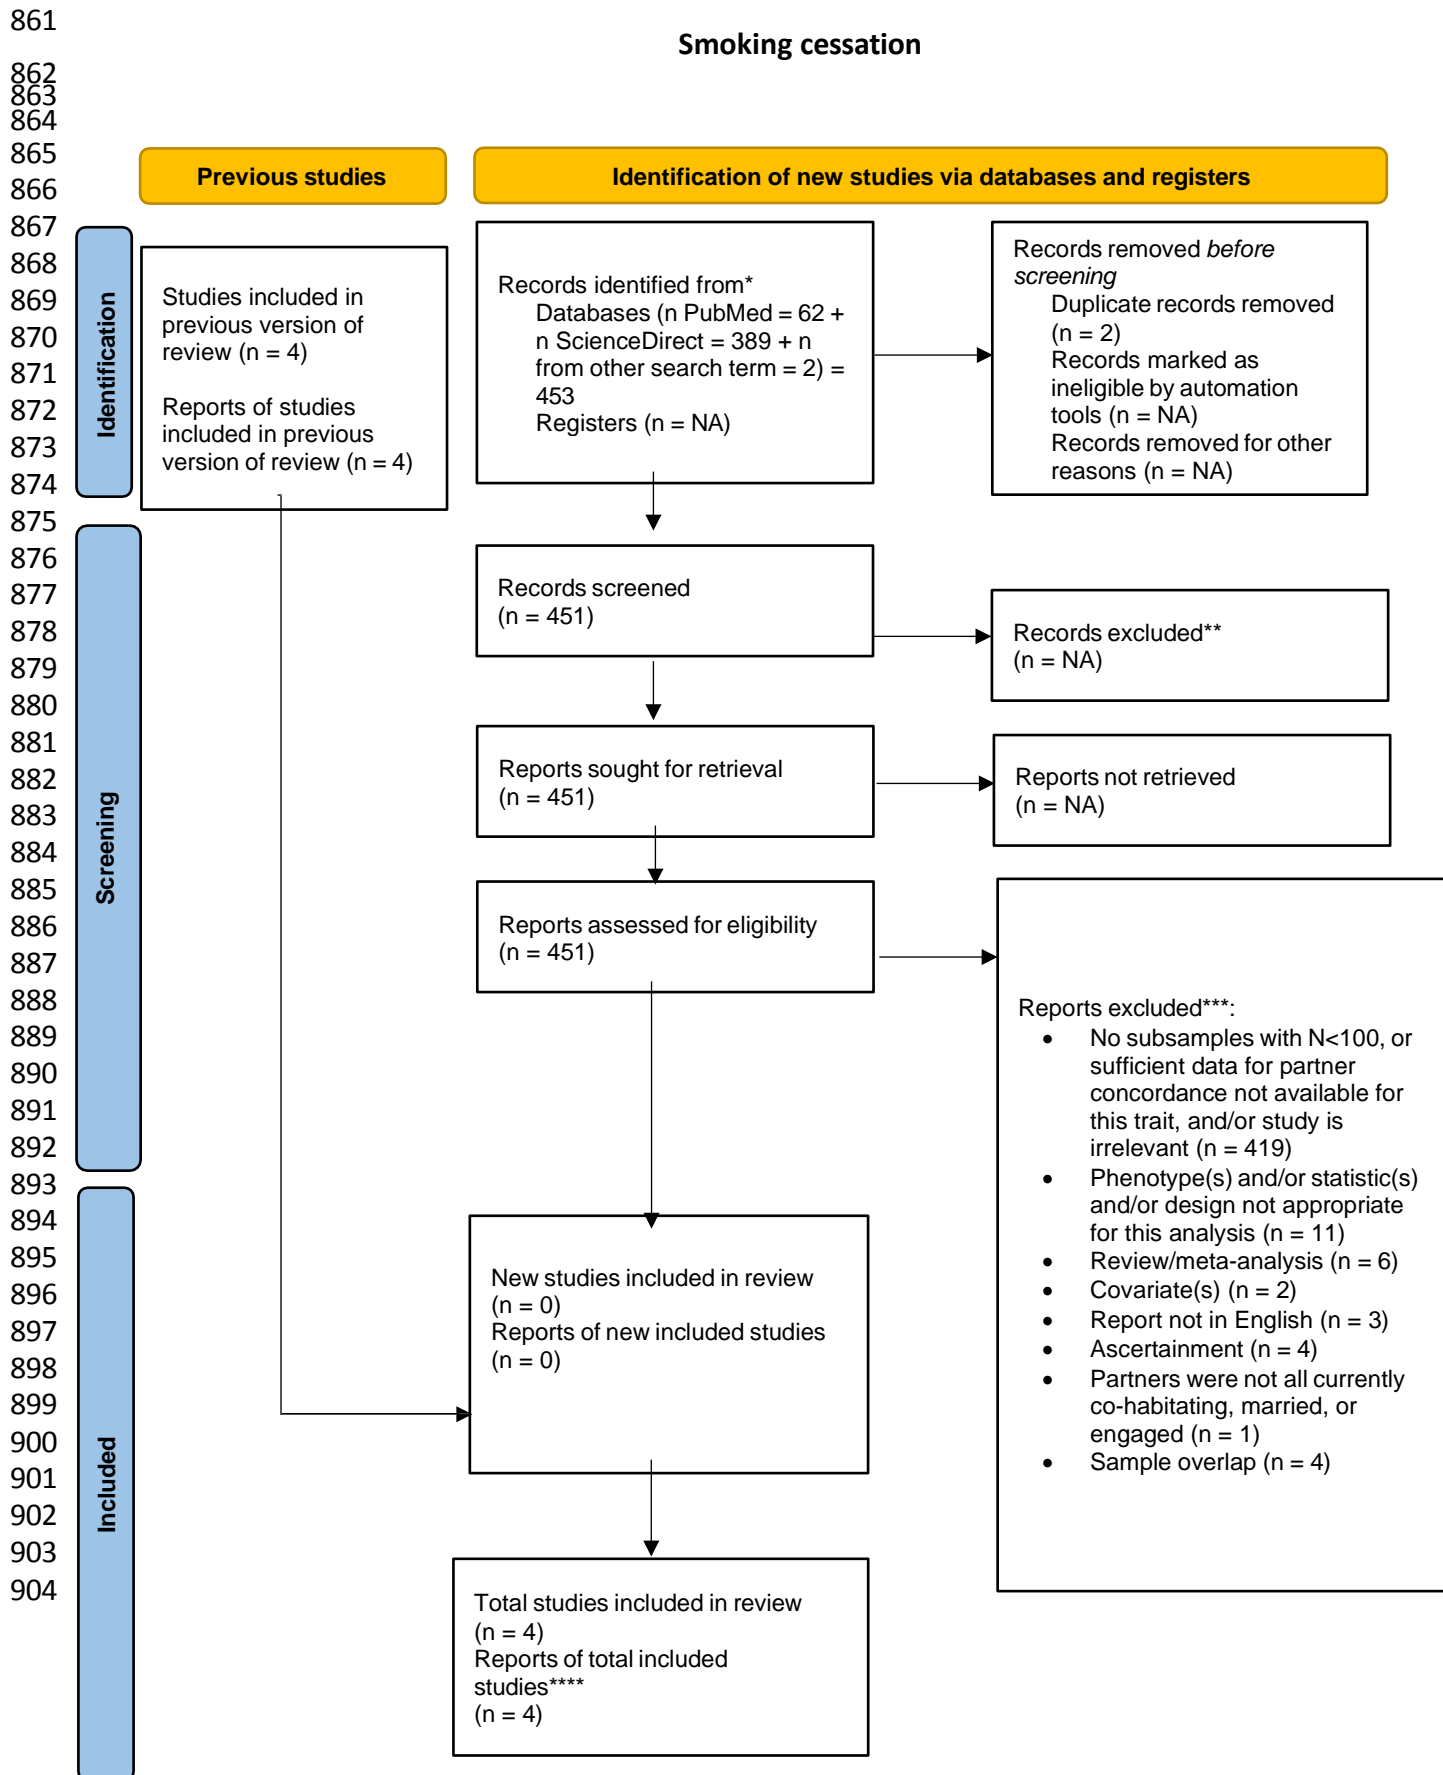

905  
906  
907  
908  
909  
910  
911  
912  
913  
914  
915  
916  
917  
918  
919  
920  
921  
922  
923  
924  
925  
926  
927  
928  
929  
930  
931  
932  
933  
934  
935  
936  
937  
938  
939  
940  
941  
942  
943  
944  
945  
946  
947  
948  
949

## Smoking quantity

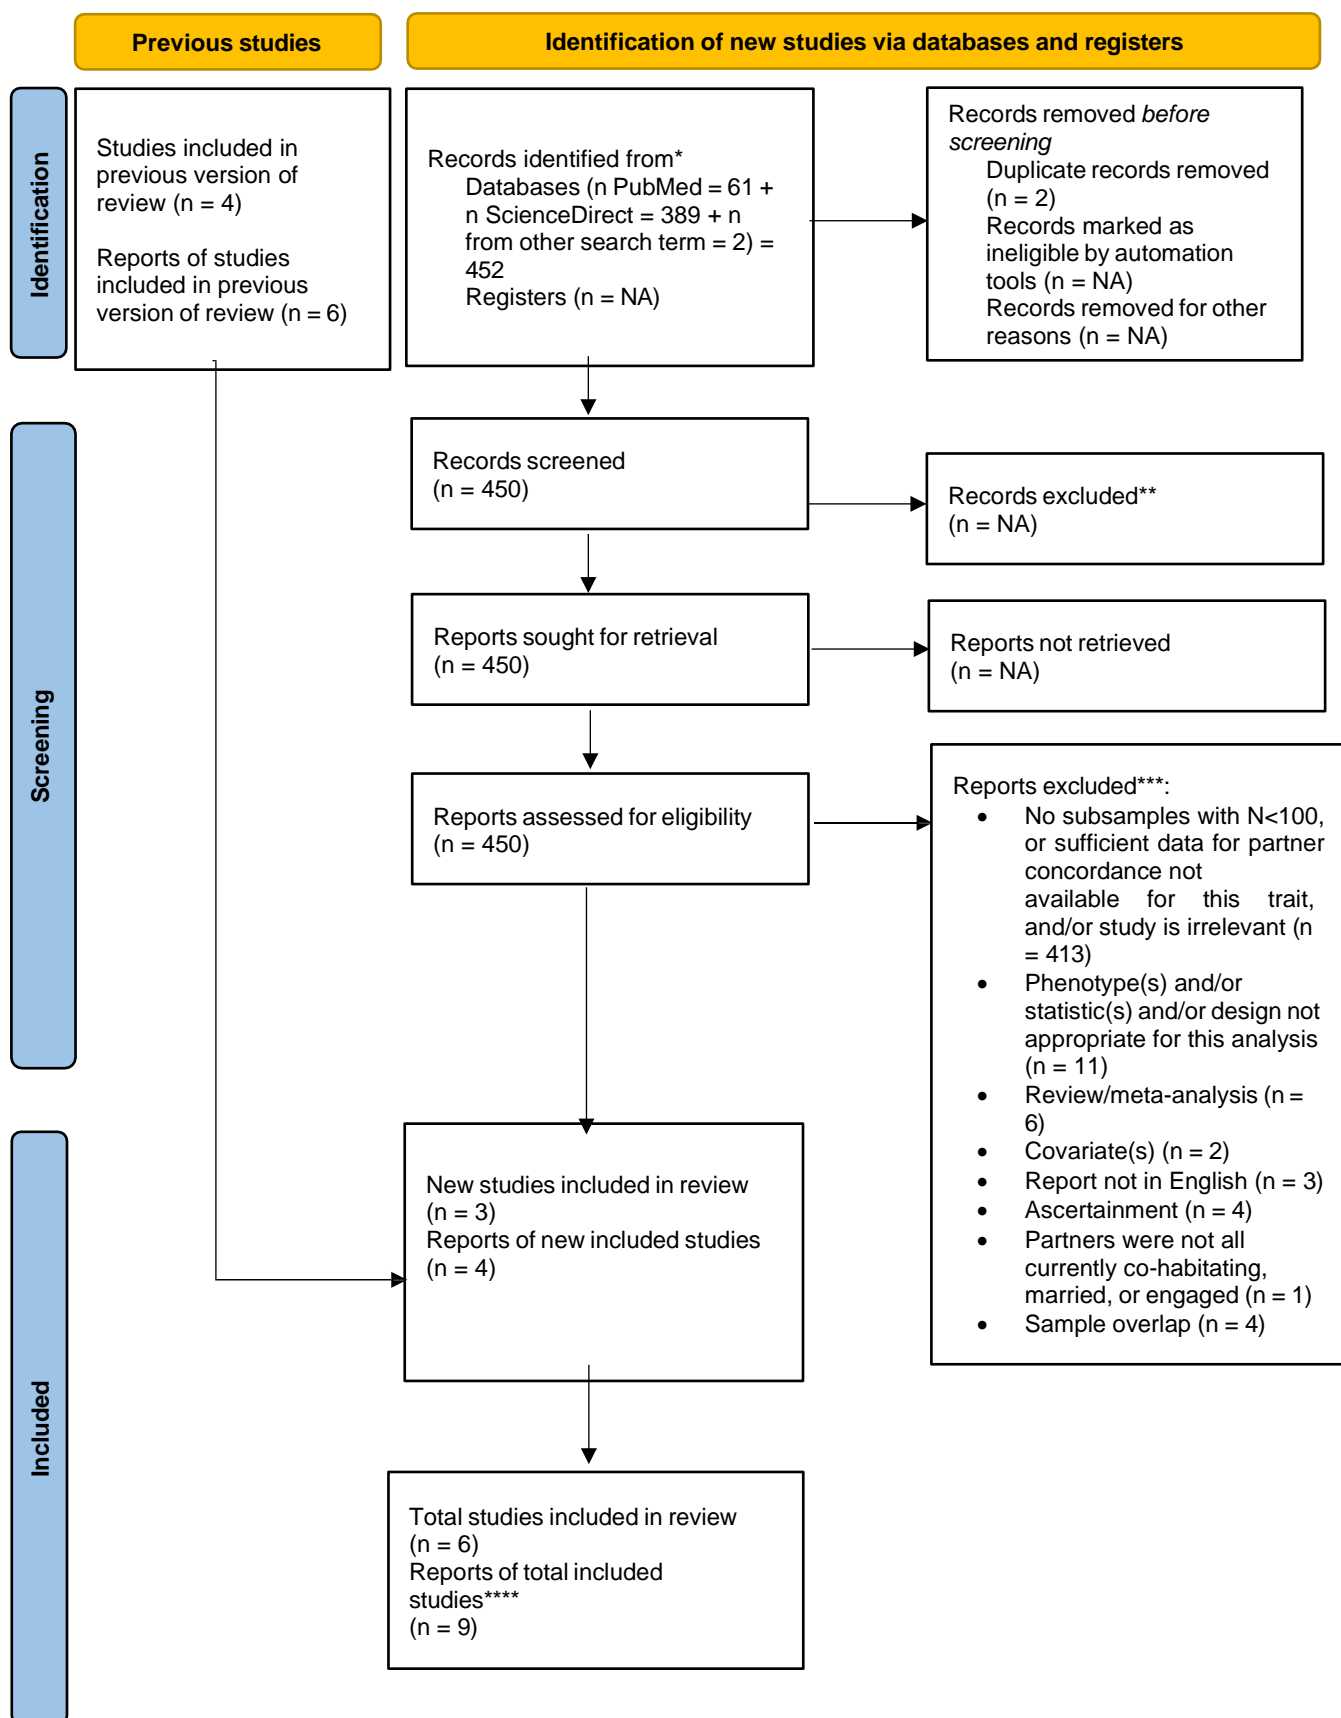

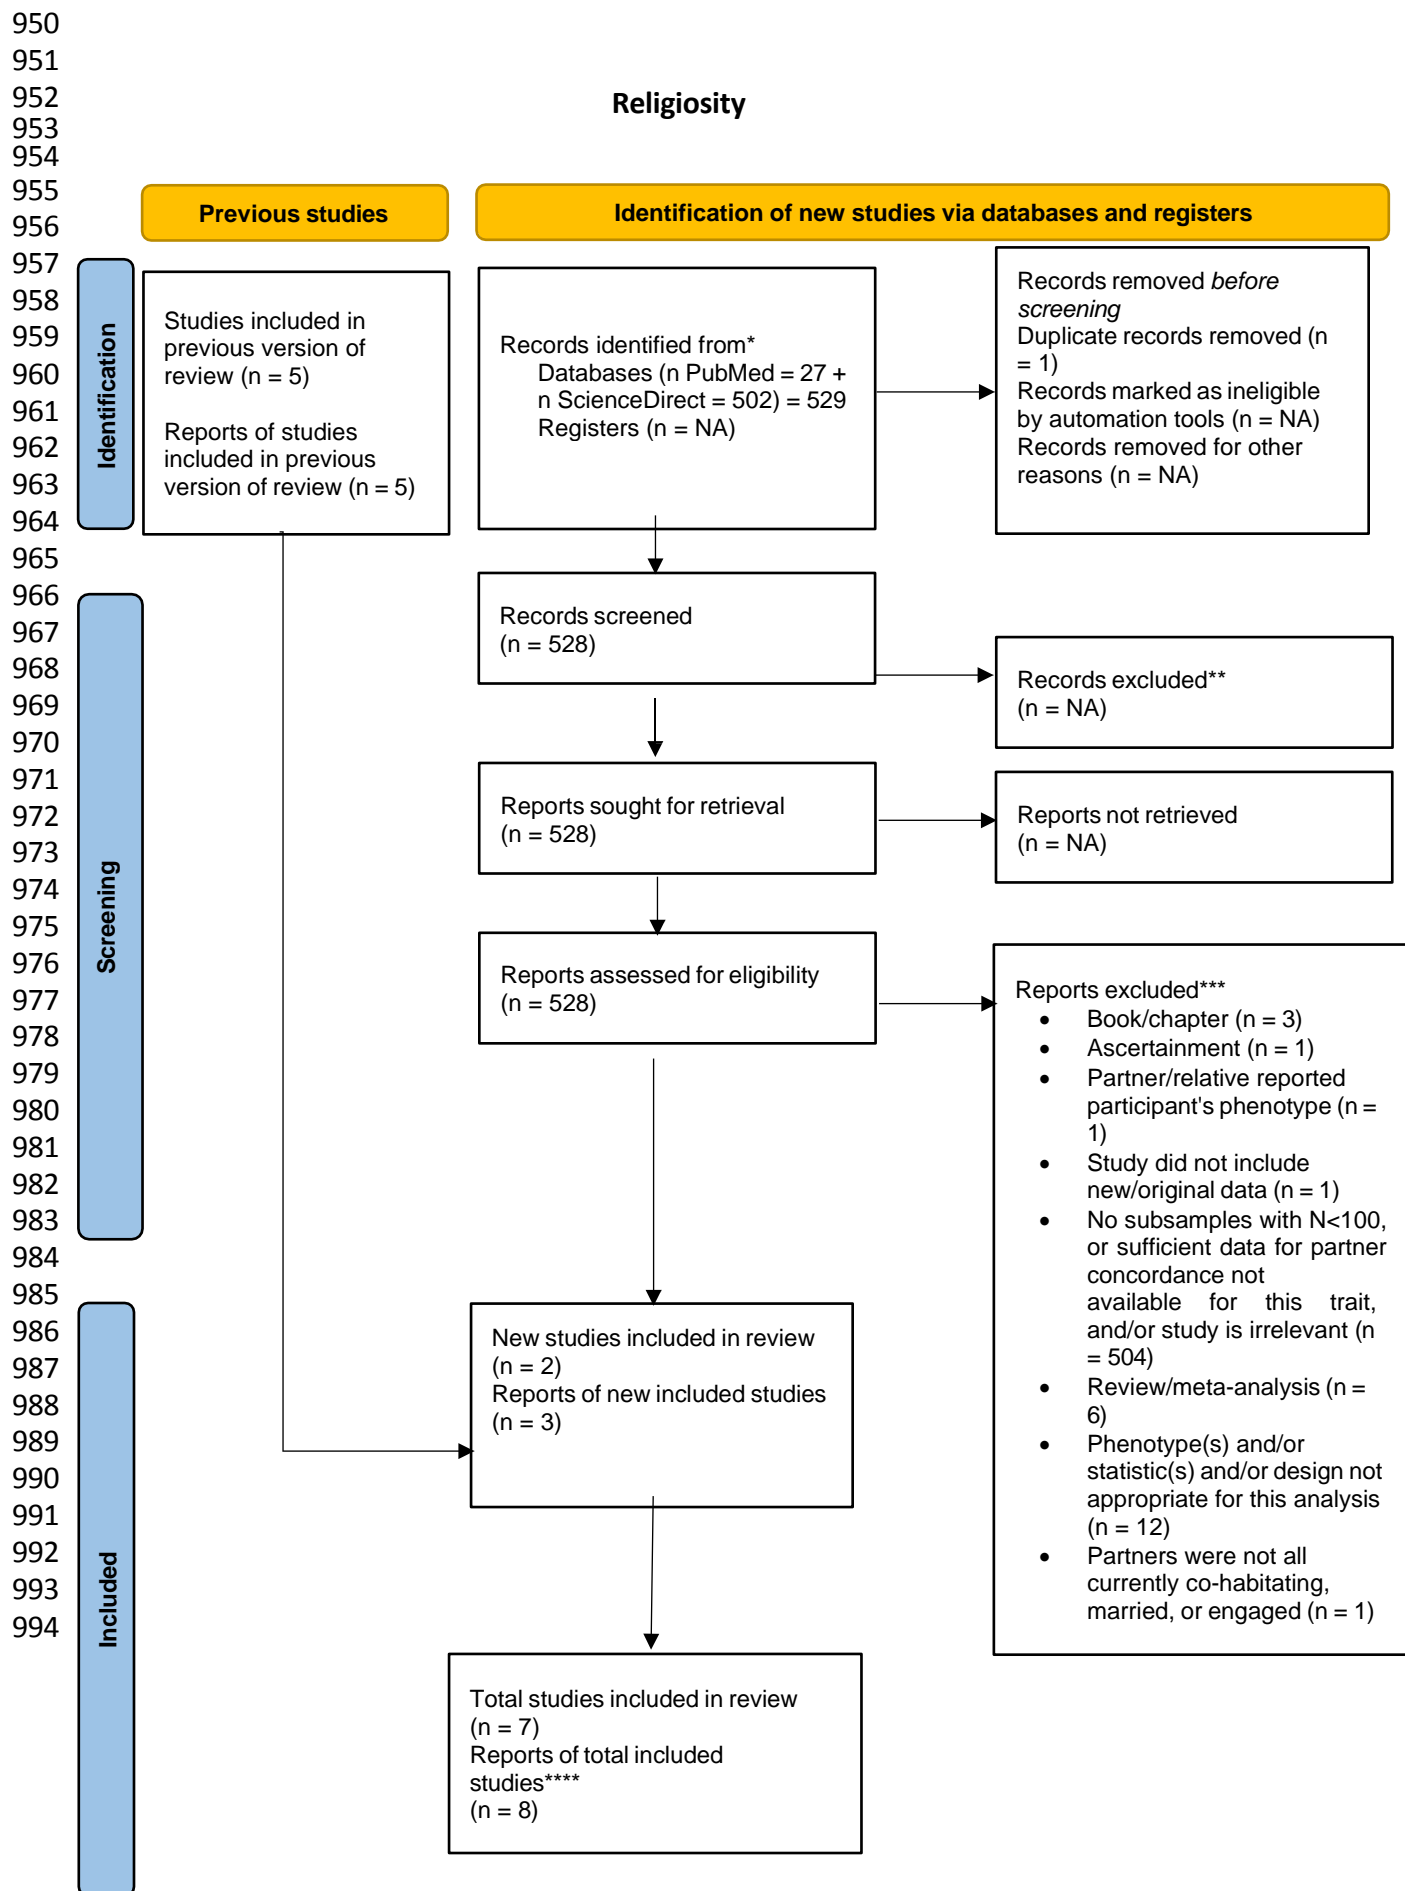

## Political values

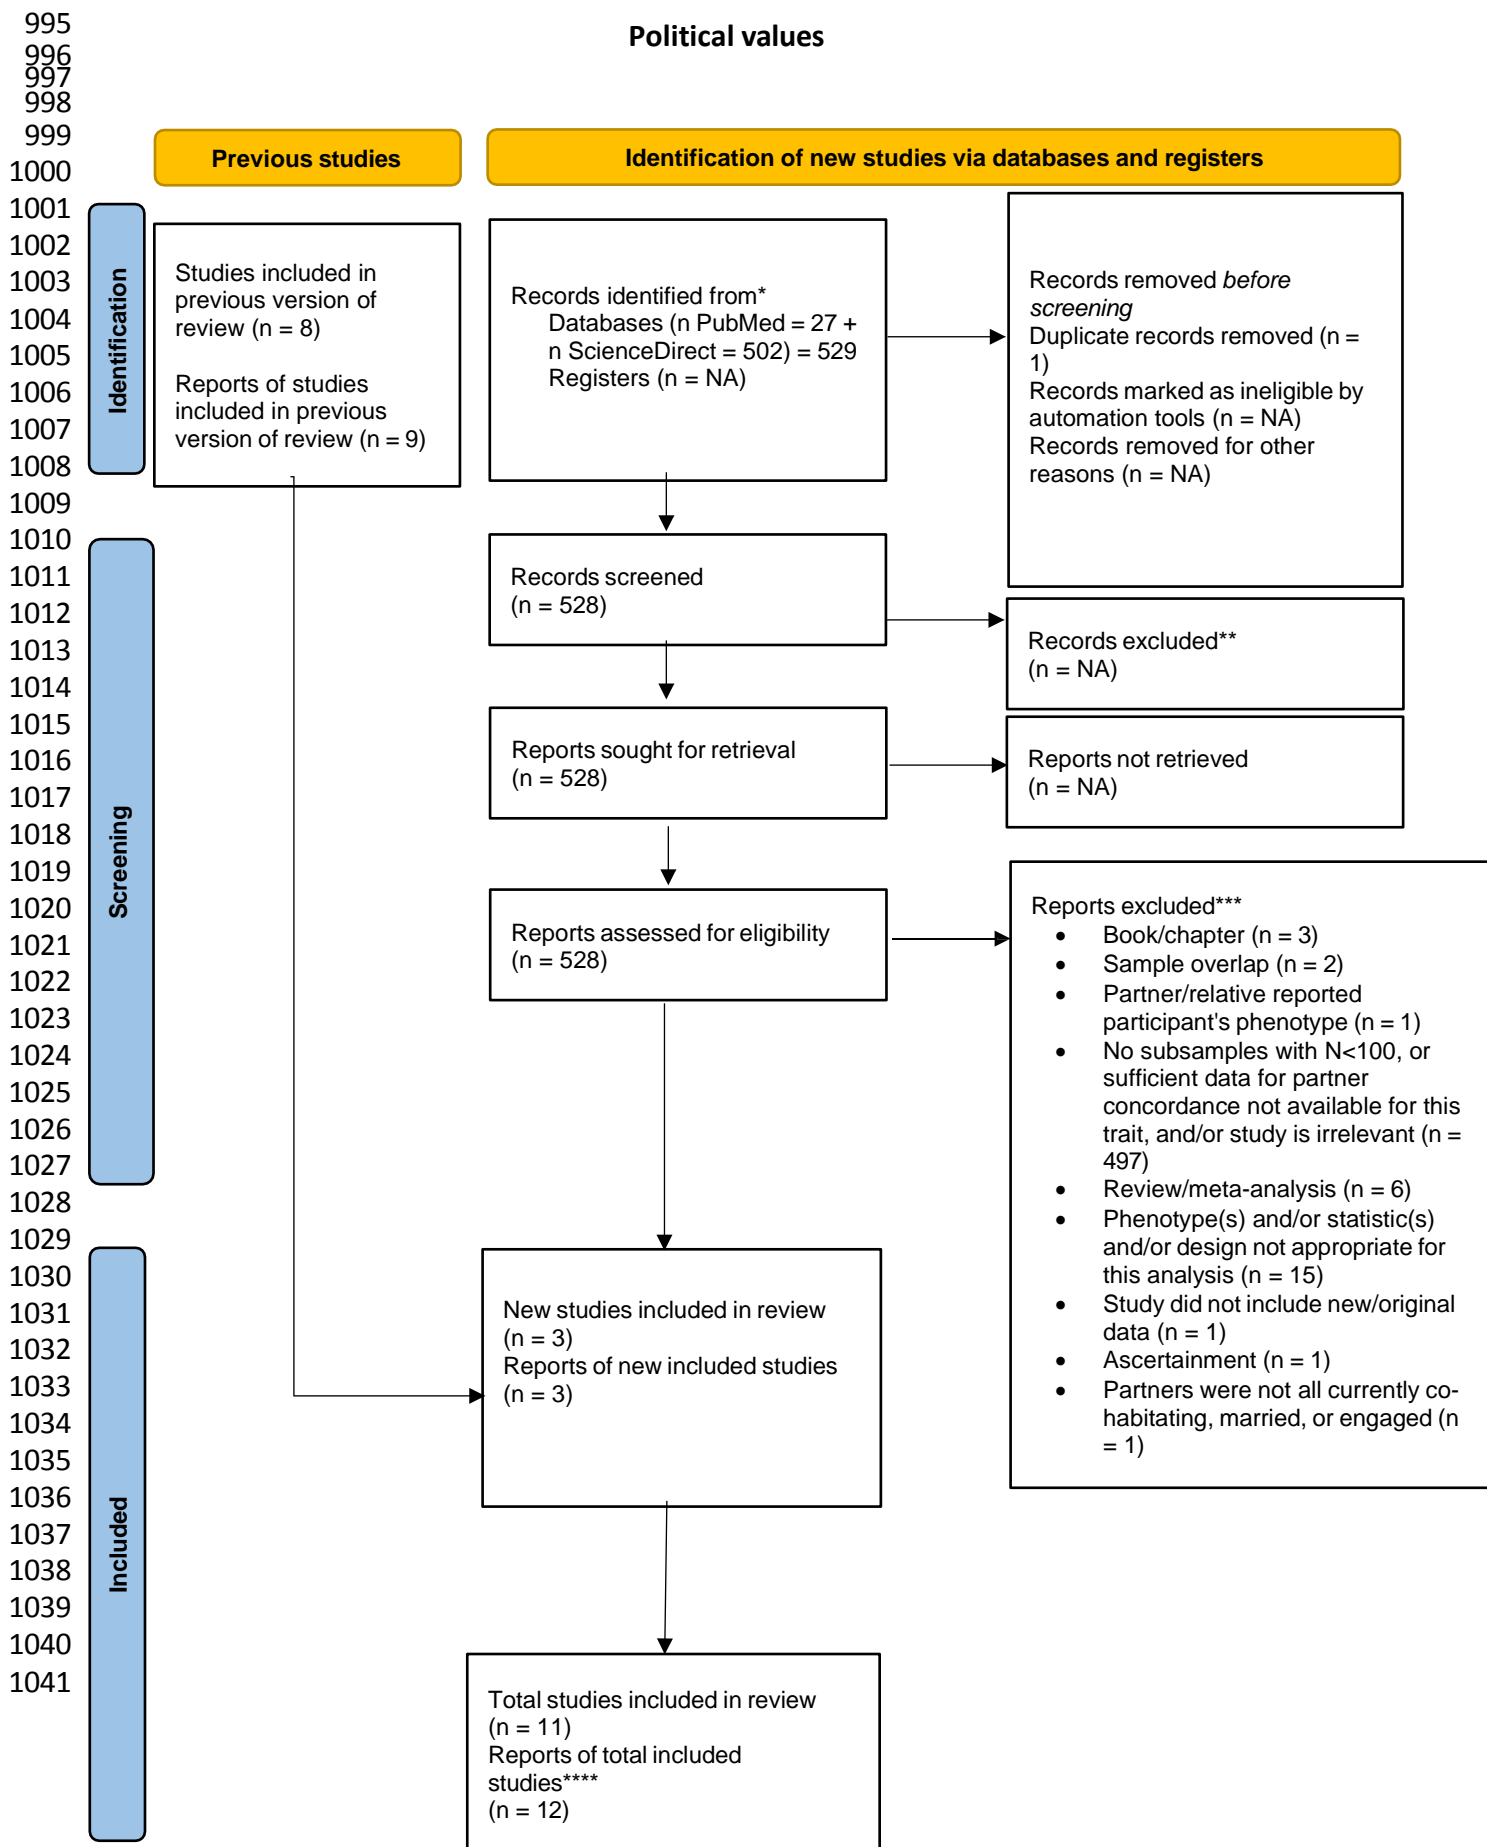



## Depression

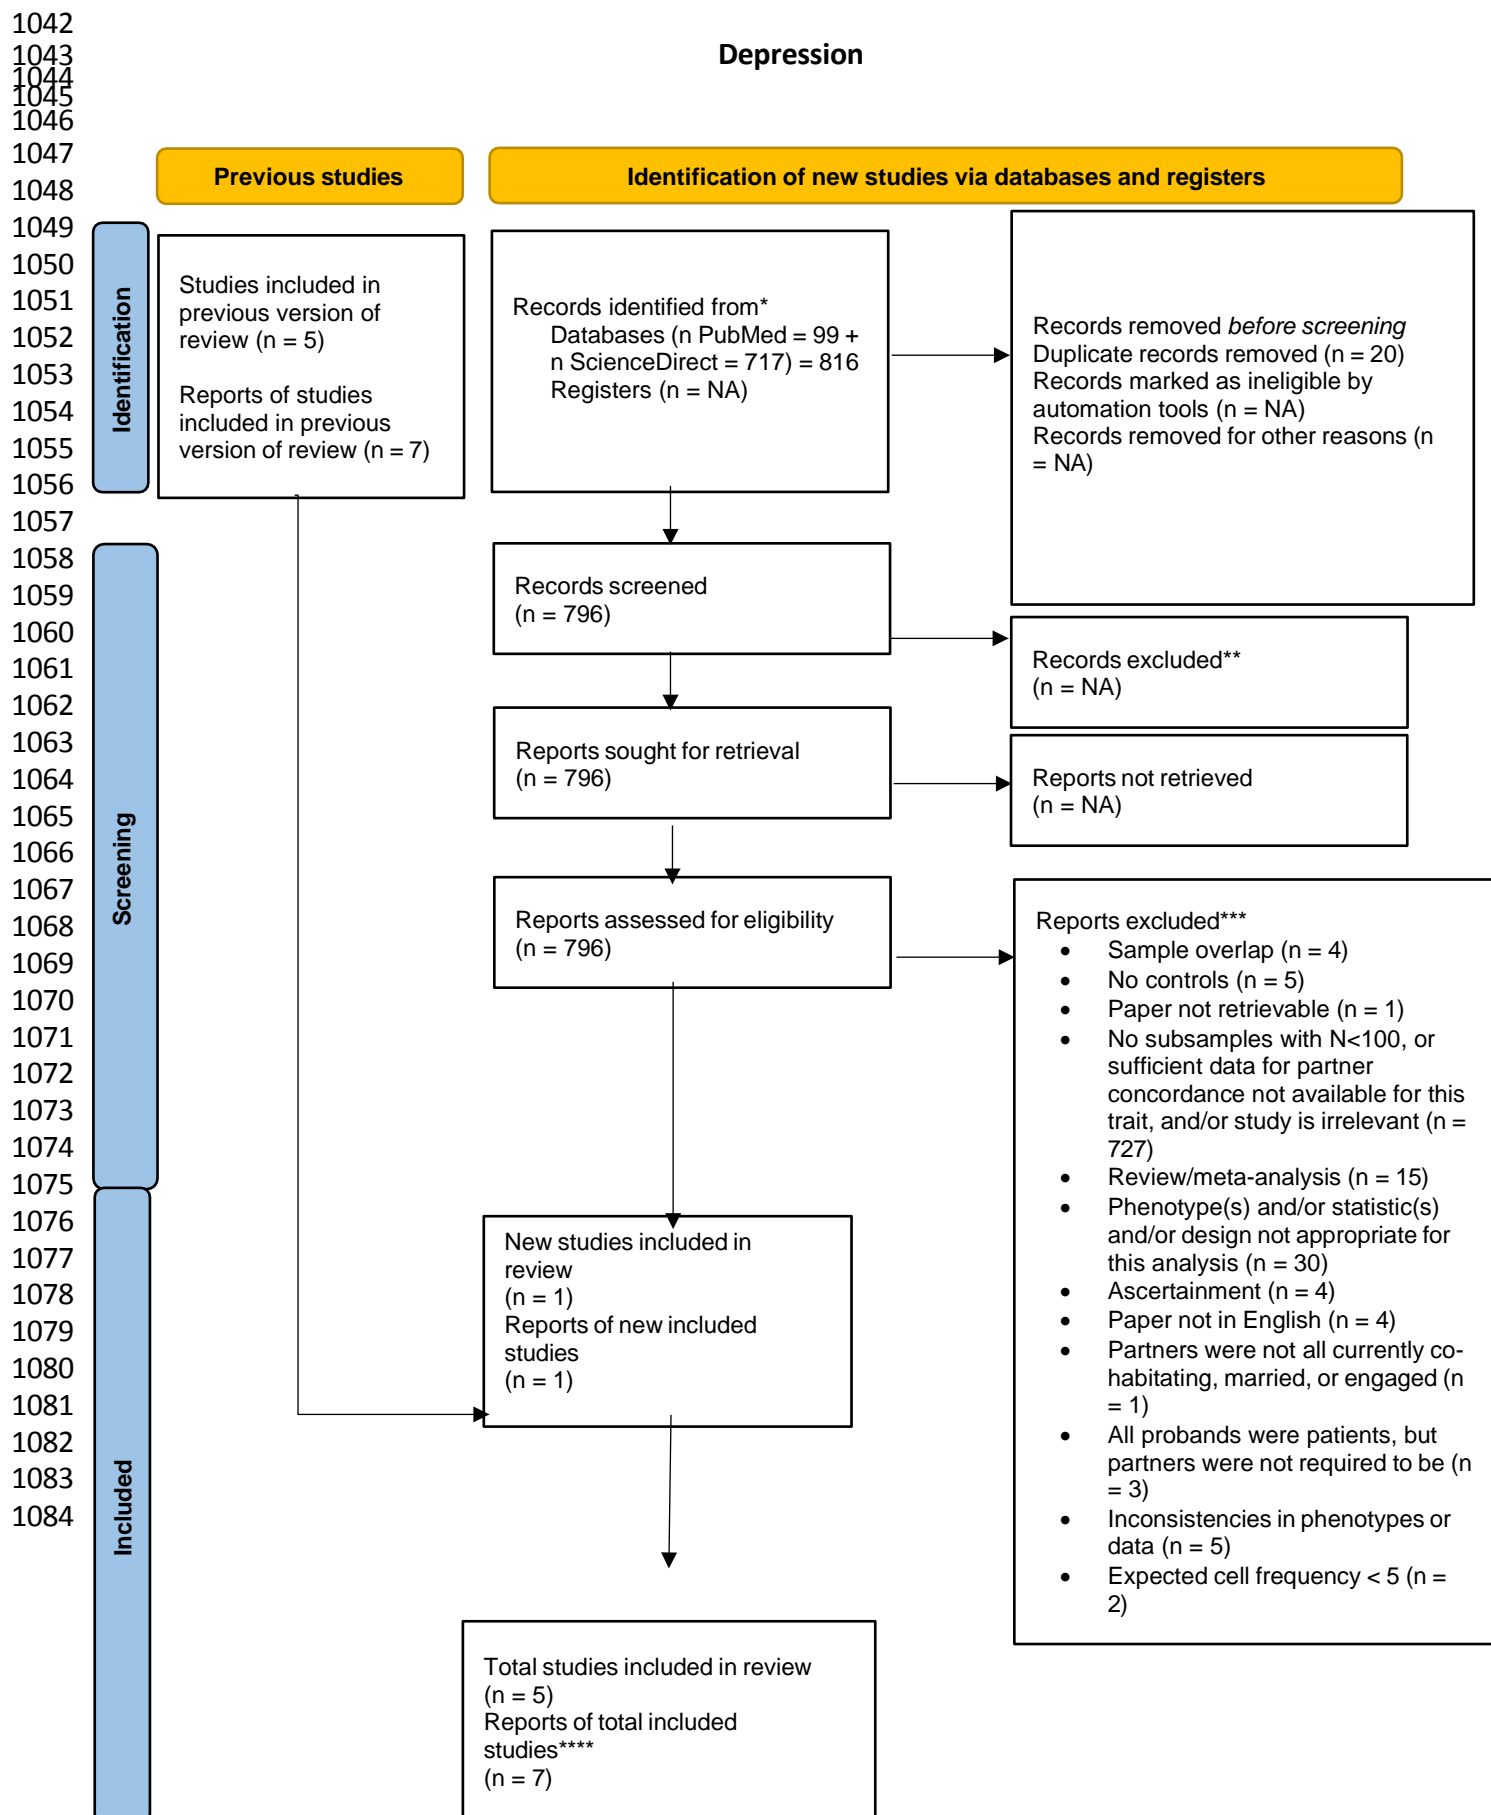

## Generalized anxiety

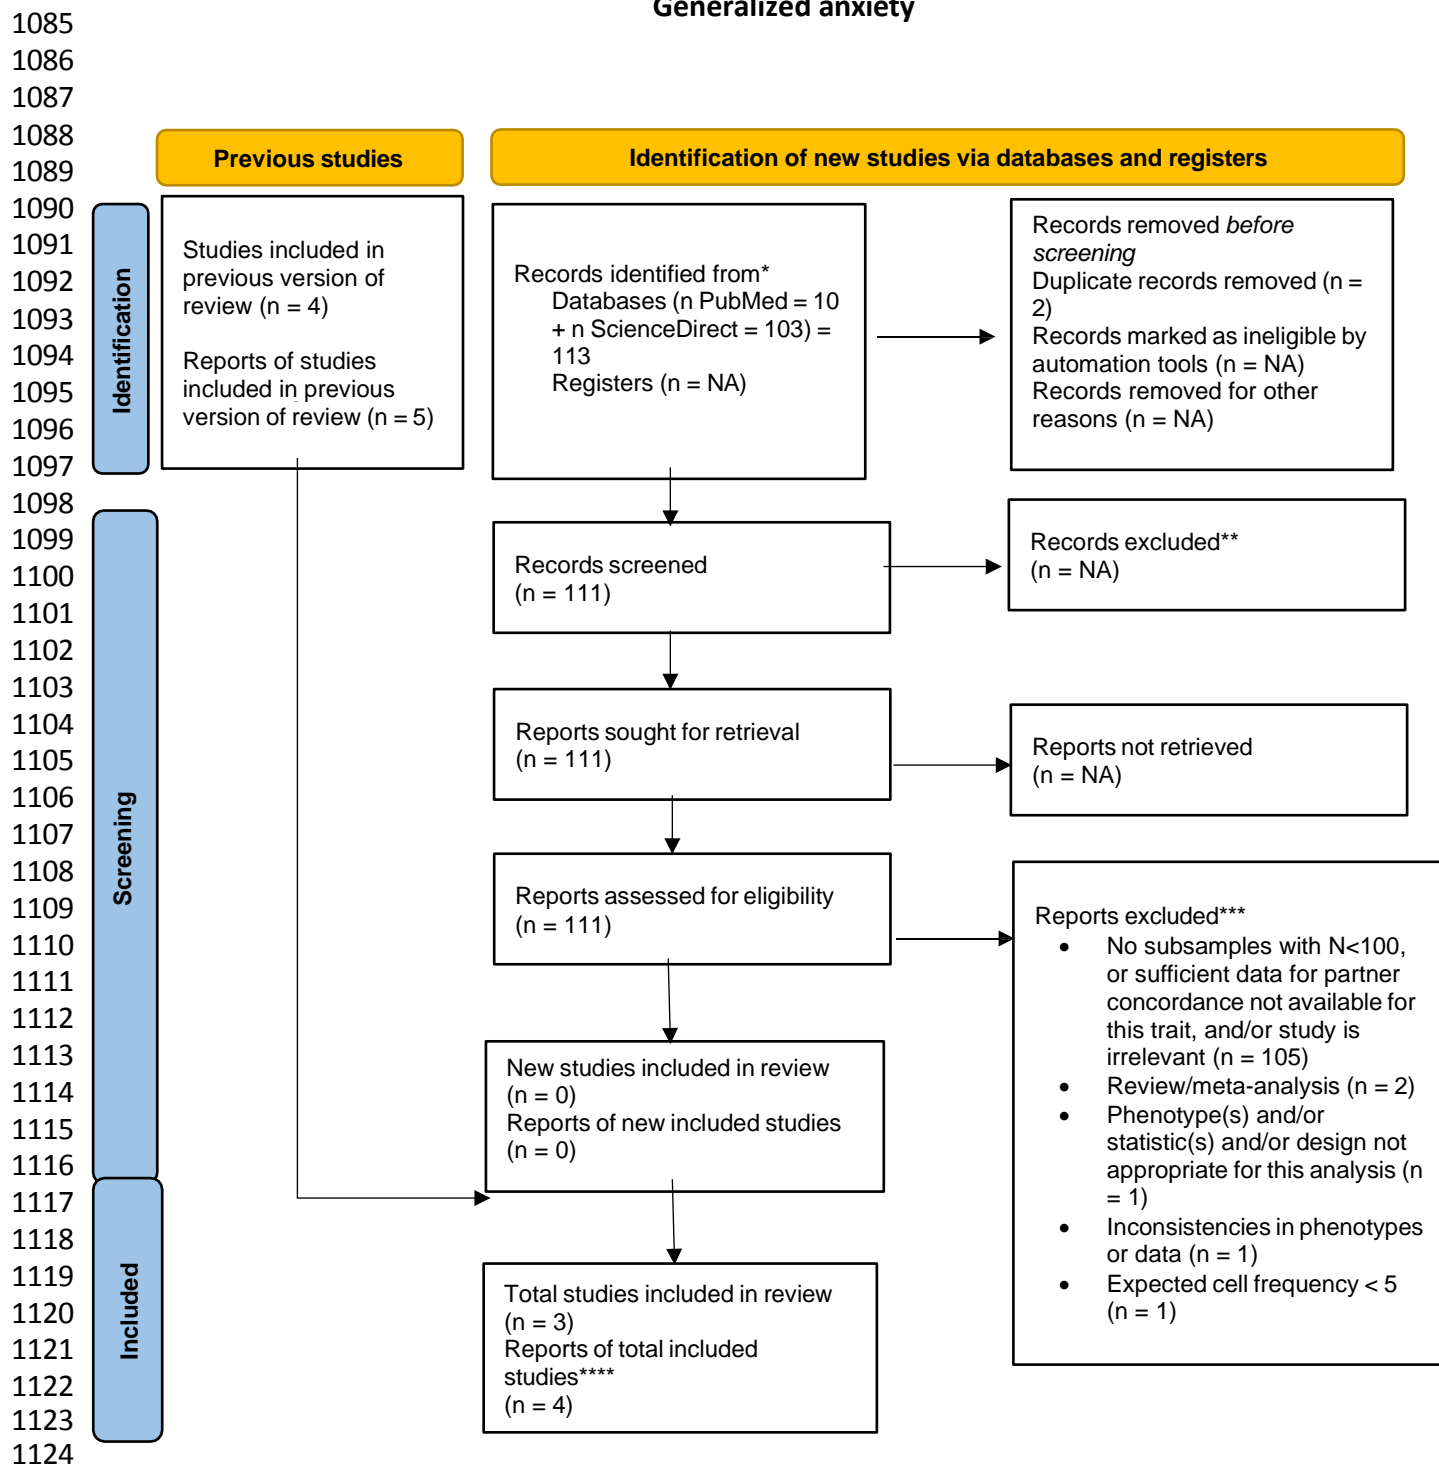

The PRISMA diagrams depict the number of records each search engine returned for each phenotype and the number of reports excluded for various reasons.

1125 \*Consider, if feasible to do so, reporting the number of records identified from each database or register searched (rather than the  
1126 total number across all databases/registers).

1127 \*\*If automation tools were used, indicates how many records were excluded by a human and how many were excluded by  
1128 automation tools.

1129 \*\*\*Total may exceed number of reports assessed for eligibility minus new studies included because some reports were excluded  
1130 for more than one reason.

1131 \*\*\*\*Total may differ from number of reports in previous version plus number of new reports if any reports from the original  
1132 version were since excluded

1133

### 1134 **Supplementary Note**

1135 *The following lists the traits we meta-analyzed and citations corresponding to each study that*  
1136 *was meta-analyzed for that trait, followed by descriptions of the more specific construct(s) that*  
1137 *we measured for that trait. For the specific measure(s) that each study used for less standardized*  
1138 *traits, see Supplementary Tables 1 and 2:*

1139

1140 **Educational attainment**<sup>1-42</sup>: Defined on an ordinal scale (e.g. range of years/schooling level  
1141 completed), or by number of years of schooling. All ordinal measures of educational attainment  
1142 with fewer than four points were excluded.

1143 **Intelligence quotient score**<sup>25,43-54</sup>: Any measure of *general* intelligence quotient.

1144 **Political values**<sup>7,8,44,55-62</sup>: We considered continuous or ordinal measures of attitudes toward  
1145 political issues instead of specific party affiliation/support.

1146 **Religiosity**<sup>7,44,55,59,61,63,64</sup>: We considered continuous measures of religious ideals/practices,  
1147 rather than specific religious affiliation or only attendance at a place of worship.

1148 **Problematic alcohol use**<sup>65-68</sup>: This was measured as a dichotomous trait encompassing alcohol  
1149 abuse, alcoholism, alcohol dependence, and problem drinking.

1150 **Drinking quantity**<sup>9,28,69-75</sup>: Amount of alcohol (e.g. milliliters, grams, ounces, or kilocalories)  
1151 consumed per day or week.

1152

1153 **Smoking cessation**<sup>76-79</sup>: This was a dichotomous measure of whether subjects were former or  
1154 current smokers among couples in which both partners had a history of smoking. Because the  
1155 phenotype was only examined in couples in which both partners had ever smoked, whenever  
1156 “never smoked” was included as an option for participants, this cell was excluded from the  
1157 contingency table such that for this measure, the odds ratio reflected the odds of a partner being a  
1158 former smoker if their partner was a former smoker divided by the odds of a partner being a  
1159 former smoker if their partner was a current smoker.

1160 **Smoking initiation**<sup>9,69-71,74,76-83</sup>: This was a dichotomous measure of whether participants had  
1161 ever smoked tobacco, had ever smoked regularly, or had ever smoked 100 or more cigarettes,  
1162 depending on the study. When options for participants included “former,” “current,” and  
1163 “never,” cells from those who responded “former” and “current” were combined in the  
1164 contingency table such that for this measure, the odds ratio reflected the odds of a partner having  
1165 ever smoked (formerly *or* currently) if their partner ever smoked (formerly *or* currently) divided  
1166 by the odds of a partner having ever smoked if their partner never smoked.

1167 **Smoking quantity**<sup>29,84-88</sup>: Number of cigarettes (or equivalent in tobacco) consumed per day  
1168 (not restricted to those with smoking histories).

1169 **Smoking status**<sup>6,69,76-78,80,82,83,86,88-98</sup>: This was a dichotomous measure of whether participants  
1170 currently smoked tobacco. When options for participants included “former,” “current,” and  
1171 “never,” cells from those who responded “former” and “never” were combined in the  
1172 contingency table such that for this measure, the odds ratio reflected the odds of a partner being a  
1173 current smoker if their partner was a current smoker divided by the odds of a partner being a  
1174 current smoker if their partner did not currently smoke (never smoked *or* formerly smoked).

1175 **Substance use disorder**<sup>99–101</sup>: This was measured as a dichotomous trait also encompassing  
1176 substance dependence and substance abuse.

1177 **Agreeableness**<sup>12,44,56,102–110</sup>: A “Big Five” personality trait characterized by an individual’s level  
1178 of kindness, sympathy, cooperativeness, warmth, politeness, etc.<sup>111</sup> Scores for this trait were  
1179 typically based on the degree to which participants agreed with statements pertaining to  
1180 agreeableness or where they identified themselves on a set of spectra of bipolar adjectives  
1181 pertaining to agreeableness. Ratings were typically given on a 5-point or 7-point scale (see  
1182 Supplementary Table 1 for the measure used in each study).

1183 **Conscientiousness**<sup>12,44,56,102–110</sup>: A “Big Five” personality trait characterized by an individual’s  
1184 level of efficiency, organization, carefulness, tidiness, practicality, etc.<sup>111</sup> Scores for this trait  
1185 were typically based on the degree to which participants agreed with statements pertaining to  
1186 conscientiousness or where they identified themselves on a set of spectra of bipolar adjectives  
1187 pertaining to conscientiousness. Ratings were typically given on a 5-point or 7-point scale (see  
1188 Supplementary Table 1 for the measure used in each study).

1189 **Extraversion**<sup>7,8,12,43–45,55,56,62,63,69,85,102–110,112–120</sup>: A “Big Five” personality trait characterized by  
1190 an individual’s level of energy, talkativeness, outgoingness, etc.<sup>111</sup> Scores for this trait were  
1191 typically based on the degree to which participants agreed with statements pertaining to  
1192 extraversion or where they identified themselves on a set of spectra of bipolar adjectives  
1193 pertaining to extraversion. Ratings were typically given on a 5-point or 7-point scale (see  
1194 Supplementary Table 1 for the measure used in each study).

1195 **Neuroticism**<sup>7,12,44,45,56,62,63,69,85,102–110,112,113,115–124</sup> (otherwise characterized by its diametric  
1196 opposite, emotional stability<sup>125</sup>): A “Big Five” personality trait characterized by an individual’s  
1197 level of enviousness, jealousy, (in)security, anxiety, moodiness, emotionality, etc.<sup>111</sup> Scores for

1198 this trait were typically based on the degree to which participants agreed with statements  
1199 pertaining to neuroticism or where they identified themselves on a set of spectra of bipolar  
1200 adjectives pertaining to neuroticism. Ratings were typically given on a 5-point or 7-point scale  
1201 (see Supplementary Table 1 for the measure used in each study).

1202 **Openness**<sup>12,44,56,102,103,105,106,108,110,123,126</sup> (otherwise characterized as Intellect or Openness to  
1203 experience): A “Big Five” personality trait characterized by an individual’s level of creativeness,  
1204 intelligence, imagination, etc.<sup>111</sup> Scores for this trait were typically based on the degree to which  
1205 participants agreed with statements pertaining to openness or where they identified themselves  
1206 on a set of spectra of bipolar adjectives pertaining to openness. Ratings were typically given on a  
1207 5-point or 7-point scale (see Supplementary Table 1 for the measure used in each study).

1208 **Body mass index**<sup>1,8,9,36,39,41,70,71,76,80,83,93,120,127–153</sup>: Kilograms/meters<sup>2</sup> or any measure of  
1209 weight/height<sup>2</sup>.

1210 **Height**<sup>4,8,36,41,49,69,75,120,129,130,141,142,148–188</sup>: We re-analyzed 68 samples from 53 studies from a  
1211 single meta-analysis of partner correlations for standing height<sup>189</sup> (see main text).

1212 **Waist-to-Hip ratio**<sup>70,128,132,140,147,190</sup>: Waist circumference/hip circumference.

1213 **Depression**<sup>65,66,99,191,192</sup>: This was measured as a dichotomous trait. In addition to a classic  
1214 diagnosis of major depression, we considered studies that presented partner concordance based  
1215 on whether participants lay below or above a cut-off score indicating a depressive  
1216 disorder/episode or a probable depressive disorder/episode. However, we excluded studies that  
1217 only presented partner concordance in the form of correlations for symptom count.

1218 **Diabetes**<sup>77,83,99,147,191,193–197</sup>: This was measured as a dichotomous trait. We only included studies  
1219 that examined prevalent diabetes, excluding studies that only measured participants with incident  
1220 diabetes (individuals who developed diabetes over the course of the study period). One study<sup>194</sup>

1221 reported concordance for type 2 diabetes, but we included it because 90-95% of people with  
1222 diabetes have type 2<sup>198</sup>.

1223 **Generalized anxiety**<sup>65,66,199</sup>: This was measured as a dichotomous trait. In addition to a classic

1224 diagnosis of generalized anxiety disorder, we considered studies that presented partner

1225 concordance based on whether participants lay below or above a cut-off score, though we

1226 excluded studies that only presented partner concordance in the form of correlation for symptom

1227 count. We also excluded analyses measuring concordance for *any* anxiety disorder.

1228

1229

1230

1231

1232

1233

## References

- 1234
- 1235
- 1236 1. Retnakaran, R. *et al.* Spousal concordance of cardiovascular risk factors in newly married
- 1237 couples in china. *JAMA Netw. Open* **4**, e2140578 (2021).
- 1238 2. Blackaby, D. H., Carlin, P. S. & Murphy, P. D. A change in the earnings penalty for British
- 1239 men with working wives: Evidence from the 1980's and 1990's. *Labour Econ.* **14**, 119–134
- 1240 (2007).
- 1241 3. Neidhöfer, G., Serrano, J. & Gasparini, L. Educational inequality and intergenerational
- 1242 mobility in Latin America: A new database. *J. Dev. Econ.* **134**, 329–349 (2018).
- 1243 4. Dalmia, S. & Lawrence, P. G. An empirical analysis of assortative mating in India and the
- 1244 US. *Int. Adv. Econ. Res.* **7**, 443–458 (2001).
- 1245 5. Kardum, I., Hudek-Knezevic, J. & Mehic, N. Similarity indices of the Dark Triad traits
- 1246 based on self and partner-reports: Evidence from variable-centered and couple-centered
- 1247 approaches. *Personal. Individ. Differ.* **193**, 111626 (2022).
- 1248 6. Torvik, F. A., Gustavson, K., Røysamb, E. & Tambs, K. Health, health behaviors, and
- 1249 health dissimilarities predict divorce: results from the HUNT study. *BMC Psychol.* **3**, 13
- 1250 (2015).
- 1251 7. Feng, D. & Baker, L. Spouse similarity in attitudes, personality, and psychological well-
- 1252 being. *Behav. Genet.* **24**, 357–364 (1994).
- 1253 8. Zietsch, B. P., Verweij, K. J., Heath, A. C. & Martin, N. G. Variation in human mate
- 1254 choice: simultaneously investigating heritability, parental influence, sexual imprinting, and
- 1255 assortative mating. *Am. Nat.* **177**, 605–616 (2011).
- 1256 9. Dufouil, C. & Aléprouvitch, A. Couple similarities for cognitive functions and psychological
- 1257 health. *J. Clin. Epidemiol.* **53**, 589–593 (2000).



- 1258 10. Luo, S. & Klohnen, E. C. Assortative Mating and Marital Quality in Newlyweds: A  
1259 Couple-Centered Approach. *J. Pers. Soc. Psychol.* **88**, 304–326 (2005).
- 1260 11. Watkins, M. P. & Meredith, W. Spouse similarity in newlyweds with respect to specific  
1261 cognitive abilities, socioeconomic status, and education. *Behav. Genet.* **11**, 1–21 (1981).
- 1262 12. Botwin, M. D., Buss, D. M. & Shackelford, T. K. Personality and mate preferences: five  
1263 factors in mate selection and marital satisfaction. *J. Pers.* **65**, 107–136 (1997).
- 1264 13. Hugh-Jones, D., Verweij, K. J. H., St. Pourcain, B. & Abdellaoui, A. Assortative mating on  
1265 educational attainment leads to genetic spousal resemblance for polygenic scores.  
1266 *Intelligence* **59**, 103–108 (2016).
- 1267 14. Gayle, G.-L., Golan, L. & Soytaş, M. A. What is the source of the intergenerational  
1268 correlation in earnings? *J. Monet. Econ.* **129**, 24–45 (2022).
- 1269 15. Barban, N., De Cao, E., Oreffice, S. & Quintana-Domeque, C. The effect of education on  
1270 spousal education: A genetic approach. *Labour Econ.* **71**, 102023 (2021).
- 1271 16. Colagrossi, M., d’Hombres, B. & Schnepf, S. V. Like (grand)parent, like child?  
1272 Multigenerational mobility across the EU. *Eur. Econ. Rev.* **130**, 103600 (2020).
- 1273 17. Bingley, P., Cappellari, L. & Tatsiramos, K. Parental assortative mating and the  
1274 intergenerational transmission of human capital. *Eur. Assoc. Labour Econ. World Conf.*  
1275 *EALSOLEAASLE Berl. Ger. 25 – 27 June 2020* **77**, 102047 (2022).
- 1276 18. Cave, S. N., Wright, M. & von Stumm, S. Change and stability in the association of  
1277 parents’ education with children’s intelligence. *Intelligence* **90**, 101597 (2022).
- 1278 19. Carmelli, D., Swan, G. E., Hunt, S. C. & Williams, R. R. Cross-spouse correlates of blood  
1279 pressure in hypertension-prone families in Utah. *J. Psychosom. Res.* **33**, 75–84 (1989).

- 1280 20. Miller, R. N. Educational assortative mating and time use in the home. *Soc. Sci. Res.* **90**,  
1281 102440 (2020).
- 1282 21. Mishra, V. & Smyth, R. Economic returns to schooling for China's Korean minority. *J.*  
1283 *Asian Econ.* **24**, 89–102 (2013).
- 1284 22. Anderson, G. & Leo, T. W. An empirical examination of matching theories: The one child  
1285 policy, partner choice and matching intensity in urban China. *Law Finance* **41**, 468–489  
1286 (2013).
- 1287 23. Liu, J.-T., Hammitt, J. K. & Jeng Lin, C. Family background and returns to schooling in  
1288 Taiwan. *Econ. Educ. Rev.* **19**, 113–125 (2000).
- 1289 24. Hu, A. & Qian, Z. Does higher education expansion promote educational homogamy?  
1290 Evidence from married couples of the post-80s generation in Shanghai, China. *Soc. Sci.*  
1291 *Res.* **60**, 148–162 (2016).
- 1292 25. Johnson, W., Deary, I. J. & Iacono, W. G. Genetic and environmental transactions  
1293 underlying educational attainment. *Intelligence* **37**, 466–478 (2009).
- 1294 26. Xing, L., Campbell, C., Li, X., Noellert, M. & Lee, J. Education, class and assortative  
1295 marriage in rural Shanxi, China in the mid-twentieth century. *Res. Soc. Stratif. Mobil.* **66**,  
1296 100460 (2020).
- 1297 27. Peek, M. K., Stimpson, J. P., Townsend, A. L. & Markides, K. S. Well-being in older  
1298 Mexican American spouses. *The Gerontologist* **46**, 258–265 (2006).
- 1299 28. Cronkite, R. C. & Moos, R. H. The role of predisposing and moderating factors in the  
1300 stress-illness relationship. *J. Health Soc. Behav.* 372–393 (1984).
- 1301 29. Alford, J. R., Hatemi, P. K., Hibbing, J. R., Martin, N. G. & Eaves, L. J. The politics of  
1302 mate choice. *J. Polit.* **73**, 362–379 (2011).

- 1303 30. Heath, A. C. *et al.* No decline in assortative mating for educational level. *Behav. Genet.* **15**,  
1304 349–369 (1985).
- 1305 31. Lykken, D. T. & Tellegen, A. Is human mating adventitious or the result of lawful choice?  
1306 A twin study of mate selection. *J. Pers. Soc. Psychol.* **65**, 56 (1993).
- 1307 32. Kye, B. & Mare, R. D. Intergenerational effects of shifts in women’s educational  
1308 distribution in South Korea: Transmission, differential fertility, and assortative mating. *Soc.*  
1309 *Sci. Res.* **41**, 1495–1514 (2012).
- 1310 33. Ingoglia, S., Liga, F., Coco, A. L. & Inguglia, C. Informant discrepancies in perceived  
1311 parental psychological control, adolescent autonomy, and relatedness psychological needs.  
1312 *J. Appl. Dev. Psychol.* **77**, 101333 (2021).
- 1313 34. Torvik, F. A. *et al.* Mechanisms linking parental educational attainment with child ADHD,  
1314 depression, and academic problems: a study of extended families in The Norwegian  
1315 Mother, Father and Child Cohort Study. *J. Child Psychol. Psychiatry* **61**, 1009–1018  
1316 (2020).
- 1317 35. Shikishima, C. *et al.* A simple syllogism-solving test: Empirical findings and implications  
1318 for g research. *Intelligence* **39**, 89–99 (2011).
- 1319 36. Ponzio, M. & Scoppa, V. Trading height for education in the marriage market. *Am. J. Hum.*  
1320 *Biol.* **27**, 164–174 (2015).
- 1321 37. Procidano, M. E. & Rogler, L. H. Homogamous assortative mating among Puerto Rican  
1322 families: Intergenerational processes and the migration experience. *Behav. Genet.* **19**, 343–  
1323 354 (1989).
- 1324 38. Chen, H., Luo, S., Yue, G., Xu, D. & Zhaoyang, R. Do birds of a feather flock together in  
1325 China? *Pers. Relatsh.* **16**, 167–186 (2009).

- 1326 39. George, D. *et al.* Couple similarity on stimulus characteristics and marital satisfaction.  
1327 *Personal. Individ. Differ.* **86**, 126–131 (2015).
- 1328 40. Jacobs, J. A. & Furstenberg Jr, F. F. Changing places: conjugal careers and women's  
1329 marital mobility. *Soc. Forces* **64**, 714–732 (1986).
- 1330 41. Hur, Y.-M. Assortative mating for personality traits, educational level, religious affiliation,  
1331 height, weight, and body mass index in parents of a Korean twin sample. *Twin Res.* **6**, 467–  
1332 470 (2003).
- 1333 42. Verbakel, E. & Kalmijn, M. Assortative Mating Among Dutch Married and Cohabiting  
1334 Same-Sex and Different-Sex Couples: Homogamy in Same- and Different-Sex Couples. *J.*  
1335 *Marriage Fam.* **76**, 1–12 (2014).
- 1336 43. Phillips, K., Fulker, D. W., Carey, G. & Nagoshi, C. T. Direct marital assortment for  
1337 cognitive and personality variables. *Behav. Genet.* **18**, 347–356 (1988).
- 1338 44. Watson, D. *et al.* Match makers and deal breakers: analyses of assortative mating in  
1339 newlywed couples. *J. Pers.* **72**, 1029–1068 (2004).
- 1340 45. Mascie-Taylor, C. G. N. Spouse similarity for IQ and personality and convergence. *Behav.*  
1341 *Genet.* **19**, 223–227 (1989).
- 1342 46. Tambs, K., Sundet, J. M. & Berg, K. Correlations between identical twins and their spouses  
1343 suggest social homogamy for intelligence in Norway. *Personal. Individ. Differ.* **14**, 279–  
1344 281 (1993).
- 1345 47. Cattell, R. B. & Willson, J. L. Contributions concerning mental inheritance: I. of  
1346 intelligence. *Br. J. Educ. Psychol.* **8**, 129–149 (1938).

- 1347 48. Johnson, W. *et al.* Genetic and environmental influences on the Verbal-Perceptual-Image  
1348 Rotation (VPR) model of the structure of mental abilities in the Minnesota study of twins  
1349 reared apart. *Intelligence* **35**, 542–562 (2007).
- 1350 49. Keller, M. C. *et al.* The genetic correlation between height and IQ: shared genes or  
1351 assortative mating? *PLoS Genet.* **9**, e1003451 (2013).
- 1352 50. Nagoshi, C. T. & Johnson, R. C. The ubiquity of g. *Personal. Individ. Differ.* **7**, 201–207  
1353 (1986).
- 1354 51. Jester, J. M. *et al.* Intergenerational transmission of neuropsychological executive  
1355 functioning. *Brain Cogn.* **70**, 145–153 (2009).
- 1356 52. Vinkhuyzen, A. A. E., van der Sluis, S., Maes, H. H. M. & Posthuma, D. Reconsidering the  
1357 Heritability of Intelligence in Adulthood: Taking Assortative Mating and Cultural  
1358 Transmission into Account. *Behav. Genet.* **42**, 187–198 (2012).
- 1359 53. Loehlin, J. C., Horn, J. M. & Willerman, L. Modeling IQ change: evidence from the Texas  
1360 Adoption Project. *Child Dev.* 993–1004 (1989).
- 1361 54. Zonderman, A. B., Vandenberg, S. G., Spuhler, K. P. & Fain, P. R. Assortative marriage for  
1362 cognitive abilities. *Behav. Genet.* **7**, 261–271 (1977).
- 1363 55. Eaves, L. *et al.* Comparing the biological and cultural inheritance of personality and social  
1364 attitudes in the Virginia 30,000 study of twins and their relatives. *Twin Res.* **2**, 62–80  
1365 (1999).
- 1366 56. Leikas, S., Ilmarinen, V.-J., Verkasalo, M., Vartiainen, H.-L. & Lönnqvist, J.-E.  
1367 Relationship satisfaction and similarity of personality traits, personal values, and attitudes.  
1368 *Personal. Individ. Differ.* **123**, 191–198 (2018).

- 1369 57. Martin, N. G. *et al.* Transmission of social attitudes. *Proc. Natl. Acad. Sci.* **83**, 4364–4368  
1370 (1986).
- 1371 58. Feather, N. T. Family resemblances in conservatism: Are daughters more similar to parents  
1372 than sons are? *J. Pers.* **46**, 260–278 (1978).
- 1373 59. Rozin, P. Family resemblance in food and other domains: The family paradox and the role  
1374 of parental congruence. *Appetite* **16**, 93–102 (1991).
- 1375 60. Bell, E., Kandler, C. & Riemann, R. Genetic and environmental influences on sociopolitical  
1376 attitudes: addressing some gaps in the new paradigm. *Polit. Life Sci.* **37**, 236–249 (2018).
- 1377 61. Abrahamson, A. C., Baker, L. A. & Caspi, A. Rebellious teens? Genetic and environmental  
1378 influences on the social attitudes of adolescents. *J. Pers. Soc. Psychol.* **83**, 1392–1408  
1379 (2002).
- 1380 62. Eysenck, H. J. & Wakefield Jr, J. A. Psychological factors as predictors of marital  
1381 satisfaction. *Adv. Behav. Res. Ther.* **3**, 151–192 (1981).
- 1382 63. Beer, J. M., Arnold, R. D. & Loehlin, J. C. Genetic and environmental influences on MMPI  
1383 factor scales: joint model fitting to twin and adoption data. *J. Pers. Soc. Psychol.* **74**, 818  
1384 (1998).
- 1385 64. Koenig, L. B., McGue, M. & Iacono, W. G. Rearing environmental influences on  
1386 religiousness: An investigation of adolescent adoptees. *Personal. Individ. Differ.* **47**, 652–  
1387 656 (2009).
- 1388 65. Galbaud Du Fort, G., Bland, R. C., Newman, S. C. & Boothroyd, L. J. Spouse similarity for  
1389 lifetime psychiatric history in the general population. *Psychol. Med.* **28**, 789–802 (1998).
- 1390 66. Maes, H. H. *et al.* Assortative mating for major psychiatric diagnoses in two population-  
1391 based samples. *Psychol. Med.* **28**, 1389–1401 (1998).

- 1392 67. Ostermann, J., Sloan, F. A. & Taylor, D. H. Heavy alcohol use and marital dissolution in  
1393 the USA. *Soc. Sci. Med.* **61**, 2304–2316 (2005).
- 1394 68. Grant, J. D. *et al.* Spousal concordance for alcohol dependence: evidence for assortative  
1395 mating or spousal interaction effects? *Alcohol. Clin. Exp. Res.* **31**, 717–728 (2007).
- 1396 69. Price, R. A. & Vandenberg, S. G. Spouse similarity in American and Swedish couples.  
1397 *Behav. Genet.* **10**, 59–71 (1980).
- 1398 70. Di Castelnuovo, A. *et al.* Cardiovascular risk factors and global risk of fatal cardiovascular  
1399 disease are positively correlated between partners of 802 married couples from different  
1400 European countries. *Thromb. Haemost.* **98**, 648–655 (2007).
- 1401 71. Al Rashid, K. *et al.* Spousal associations of serum metabolomic profiles by nuclear  
1402 magnetic resonance spectroscopy. *Sci. Rep.* **11**, 21587 (2021).
- 1403 72. Pérusse, L., Leblanc, C. & Bouchard, C. Familial resemblance in lifestyle components:  
1404 results from the Canada Fitness Survey. *Can. J. Public Health Rev. Can. Sante Publique* **79**,  
1405 201–205 (1988).
- 1406 73. Leonard, K. E. & Das Eiden, R. Husband's and wife's drinking: unilateral or bilateral  
1407 influences among newlyweds in a general population sample. *J. Stud. Alcohol. Suppl.* 130–  
1408 138 (1999).
- 1409 74. Clarke, T.-K. *et al.* Genetic and shared couple environmental contributions to smoking and  
1410 alcohol use in the UK population. *Mol. Psychiatry* **26**, 4344–4354 (2021).
- 1411 75. Garn, S. M., Cole, P. E. & Bailey, S. M. Living together as a factor in family-line  
1412 resemblances. *Hum. Biol.* **51**, 565–587 (1979).

- 1413 76. Pyke, S. D., Wood, D. A., Kinmonth, A. L. & Thompson, S. G. Change in coronary risk  
1414 and coronary risk factor levels in couples following lifestyle intervention. The British  
1415 Family Heart Study. *Arch. Fam. Med.* **6**, 354–360 (1997).
- 1416 77. Jurj, A. L. *et al.* Spousal correlations for lifestyle factors and selected diseases in Chinese  
1417 couples. *Ann. Epidemiol.* **16**, 285–291 (2006).
- 1418 78. Venters, M. H., Jacobs Jr, D. R., Luepker, R. V., Maimaw, L. A. & Gillum, R. F. Spouse  
1419 concordance of smoking patterns: the Minnesota Heart Survey. *Am. J. Epidemiol.* **120**,  
1420 608–616 (1984).
- 1421 79. Cobb, L. K. *et al.* The association of spousal smoking status with the ability to quit  
1422 smoking: the Atherosclerosis Risk in Communities Study. *Am. J. Epidemiol.* **179**, 1182–  
1423 1187 (2014).
- 1424 80. Stimpson, J. P., Masel, M. C., Rudkin, L. & Peek, M. K. Shared health behaviors among  
1425 older Mexican American spouses. *Am. J. Health Behav.* **30**, 495–502 (2006).
- 1426 81. Maes, H. H. *et al.* Cross-cultural comparison of genetic and cultural transmission of  
1427 smoking initiation using an extended twin kinship model. *Twin Res. Hum. Genet.* **21**, 179–  
1428 190 (2018).
- 1429 82. Boomsma, D. I., Koopmans, J. R., Van Doornen, L. J. & Orlebeke, J. F. Genetic and social  
1430 influences on starting to smoke: a study of Dutch adolescent twins and their parents.  
1431 *Addiction* **89**, 219–226 (1994).
- 1432 83. Nakaya, N. *et al.* Spousal similarities in cardiometabolic risk factors: A cross-sectional  
1433 comparison between Dutch and Japanese data from two large biobank studies.  
1434 *Atherosclerosis* **334**, 85–92 (2021).



- 1435 84. Wilcox, M. A., Newton, C. S. & Johnson, I. R. Paternal influences on birthweight. *Acta*  
1436 *Obstet. Gynecol. Scand.* **74**, 15–18 (1995).
- 1437 85. Gleiberman, L., Harburg, E., DiFranceisco, W. & Schork, A. Familial transmission of  
1438 alcohol use: v. drinking patterns among spouses, tecumseh, michigan. *Behav. Genet.* **22**,  
1439 63–79 (1992).
- 1440 86. Sutton, G. C. Assortative marriage for smoking habits. *Ann. Hum. Biol.* **7**, 449–456 (1980).
- 1441 87. Cotch, M. F., Beaty, T. H. & Cohen, B. H. Path analysis of familial resemblance of  
1442 pulmonary function and cigarette smoking. *Am. Rev. Respir. Dis.* **142**, 1337–1343 (1990).
- 1443 88. Kalmijn, M. Intergenerational transmission of health behaviors in a changing demographic  
1444 context: The case of smoking and alcohol consumption. *Soc. Sci. Med.* **296**, 114736 (2022).
- 1445 89. Bloch, K. V., Klein, C. H., de Souza e Silva, N. A., Nogueira, A. da R. & Salis, L. H. A.  
1446 Socioeconomic aspects of spousal concordance for hypertension, obesity, and smoking in a  
1447 community of Rio de Janeiro, Brazil. *Arq. Bras. Cardiol.* **80**, 179–186, 171–178 (2003).
- 1448 90. Clark, A. E. & Etilé, F. Don't give up on me baby: Spousal correlation in smoking  
1449 behaviour. *J. Health Econ.* **25**, 958–978 (2006).
- 1450 91. Ogden, M. W., Morgan, W. T., Heavner, D. L., Davis, R. A. & Steichen, T. J. National  
1451 incidence of smoking and misclassification among the U.S. married female population. *J.*  
1452 *Clin. Epidemiol.* **50**, 253–263 (1997).
- 1453 92. Espinosa, J. & Evans, W. N. Heightened mortality after the death of a spouse: Marriage  
1454 protection or marriage selection? *J. Health Econ.* **27**, 1326–1342 (2008).
- 1455 93. Wilson, S. E. The health capital of families: an investigation of the inter-spousal correlation  
1456 in health status. *Soc. Sci. Med.* **55**, 1157–1172 (2002).

- 1457 94. Jackson, S. E., Steptoe, A. & Wardle, J. The influence of partner's behavior on health  
1458 behavior change: the English Longitudinal Study of Ageing. *JAMA Intern. Med.* **175**, 385–  
1459 392 (2015).
- 1460 95. Jeong, S. & Cho, S.-I. Concordance in the health behaviors of couples by age: a cross-  
1461 sectional study. *J. Prev. Med. Pub. Health* **51**, 6 (2018).
- 1462 96. Homish, G. G. & Leonard, K. E. Spousal influence on smoking behaviors in a US  
1463 community sample of newly married couples. *Soc. Sci. Med.* **61**, 2557–2567 (2005).
- 1464 97. Pai, C.-W., Godboldo-Brooks, A. & Edington, D. W. Spousal concordance for overall  
1465 health risk status and preventive service compliance. *Ann. Epidemiol.* **20**, 539–546 (2010).
- 1466 98. Machado, M. P. A. *et al.* Alcohol and tobacco consumption concordance and its correlates  
1467 in older couples in Latin America. *Geriatr. Gerontol. Int.* **17**, 1849–1857 (2017).
- 1468 99. Nordsletten, A. E. *et al.* Patterns of nonrandom mating within and across 11 major  
1469 psychiatric disorders. *JAMA Psychiatry* **73**, 354–361 (2016).
- 1470 100. Kirillova, G. P., Vanyukov, M. M., Kirisci, L. & Reynolds, M. Physical maturation, peer  
1471 environment, and the ontogenesis of substance use disorders. *Psychiatry Res.* **158**, 43–53  
1472 (2008).
- 1473 101. Sakai, J. T. *et al.* Mate similarity for substance dependence and antisocial personality  
1474 disorder symptoms among parents of patients and controls. *Drug Alcohol Depend.* **75**, 165–  
1475 175 (2004).
- 1476 102. McCrae, R. R. *et al.* Personality trait similarity between spouses in four cultures. *J. Pers.*  
1477 **76**, 1137–1164 (2008).
- 1478 103. Rammstedt, B. & Schupp, J. Only the congruent survive—personality similarities in couples.  
1479 *Personal. Individ. Differ.* **45**, 533–535 (2008).

- 1480 104. Chopik, W. J. & Lucas, R. E. Actor, partner, and similarity effects of personality on global  
1481 and experienced well-being. *J. Res. Personal.* **78**, 249–261 (2019).
- 1482 105. Vandermeer, M. R. J., Kotelnikova, Y., Simms, L. J. & Hayden, E. P. Spousal Agreement  
1483 on Partner Personality Ratings is Moderated by Relationship Satisfaction. *J. Res. Personal.*  
1484 **76**, 22–31 (2018).
- 1485 106. Watson, D., Beer, A. & McDade-Montez, E. The role of active assortment in spousal  
1486 similarity. *J. Pers.* **82**, 116–129 (2014).
- 1487 107. Barelds, D. P. Self and partner personality in intimate relationships. *Eur. J. Personal. Publ.*  
1488 *Eur. Assoc. Personal. Psychol.* **19**, 501–518 (2005).
- 1489 108. van Scheppingen, M. A., Chopik, W. J., Bleidorn, W. & Denissen, J. J. A. Longitudinal  
1490 Actor, Partner and Similarity Effects of Personality on Well-Being. *J. Pers. Soc. Psychol.*  
1491 **117**, e51–e70 (2019).
- 1492 109. Dijkstra, P. & Barelds, D. P. H. Self and partner personality and responses to relationship  
1493 threats. *J. Res. Personal.* **42**, 1500–1511 (2008).
- 1494 110. Mosca, I. & McCrory, C. Personality and wealth accumulation among older couples: Do  
1495 dispositional characteristics pay dividends? *J. Econ. Psychol.* **56**, 1–19 (2016).
- 1496 111. Thompson, E. R. Development and validation of an international english big-five mini-  
1497 markers. *Personal. Individ. Differ.* **45**, 542–548 (2008).
- 1498 112. Dubuis-Stadelmann, E., Fenton, B. T., Ferrero, F. & Preisig, M. Spouse similarity for  
1499 temperament, personality and psychiatric symptomatology. *Personal. Individ. Differ.* **30**,  
1500 1095–1112 (2001).

- 1501 113. Tambs, K., Sundet, J. M., Eaves, L., Solaas, M. H. & Berg, K. Pedigree analysis of Eysenck  
1502 Personality Questionnaire (EPQ) scores in monozygotic (MZ) twin families. *Behav. Genet.*  
1503 **21**, 369–382 (1991).
- 1504 114. Guttman, R. & Zohar, A. Spouse similarities in personality items: Changes over years of  
1505 marriage and implications for mate selection. *Behav. Genet.* **17**, 179–189 (1987).
- 1506 115. Eysenck, H. J. Personality, premarital sexual permissiveness, and assortative mating. *J. Sex*  
1507 *Res.* **10**, 47–51 (1974).
- 1508 116. Patterson, C. H. The relationship of Bernreuter scores to parent behavior, child behavior,  
1509 urban-rural residence, and other background factors in 100 normal adult parents. *J. Soc.*  
1510 *Psychol.* **24**, 3–49 (1946).
- 1511 117. Terman, L. M. & Bутtenwieser, P. Personality factors in marital compatibility: II. *J. Soc.*  
1512 *Psychol.* **6**, 267–289 (1935).
- 1513 118. Rushton, J. P. & Bons, T. A. Mate choice and friendship in twins: evidence for genetic  
1514 similarity. *Psychol. Sci.* **16**, 555–559 (2005).
- 1515 119. Farley, F. H. & Davis, S. A. Arousal, Personality, and Assortative Mating in Marriage. *J.*  
1516 *Sex Marital Ther.* **3**, 122–127 (1977).
- 1517 120. Sutton, G. C. Do men grow to resemble their wives, or vice versa? *J. Biosoc. Sci.* **25**, 25–29  
1518 (1993).
- 1519 121. Abdellaoui, A. *et al.* Associations between loneliness and personality are mostly driven by  
1520 a genetic association with Neuroticism. *J. Pers.* **87**, 386–397 (2019).
- 1521 122. Hoffeditz, E. L. Family resemblances in personality traits. *J. Soc. Psychol.* **5**, 214–227  
1522 (1934).

- 1523 123. Donnellan, M. B., Conger, R. D. & Bryant, C. M. The Big Five and enduring marriages. *J.*  
1524 *Res. Personal.* **38**, 481–504 (2004).
- 1525 124. Lake, R. I., Eaves, L. J., Maes, H. H., Heath, A. C. & Martin, N. G. Further evidence  
1526 against the environmental transmission of individual differences in neuroticism from a  
1527 collaborative study of 45,850 twins and relatives on two continents. *Behav. Genet.* **30**, 223–  
1528 233 (2000).
- 1529 125. Ormel, J., Riese, H. & Rosmalen, J. G. M. Interpreting neuroticism scores across the adult  
1530 life course: immutable or experience-dependent set points of negative affect? *Clin. Psychol.*  
1531 *Rev.* **32**, 71–79 (2012).
- 1532 126. Chopik, W. J. & Johnson, D. J. Modeling dating decisions in a mock swiping paradigm: An  
1533 examination of participant and target characteristics. *J. Res. Personal.* **92**, 104076 (2021).
- 1534 127. Sebro, R., Peloso, G. M., Dupuis, J. & Risch, N. J. Structured mating: patterns and  
1535 implications. *PLoS Genet.* **13**, e1006655 (2017).
- 1536 128. Kim, H. C. *et al.* Spousal concordance of metabolic syndrome in 3141 Korean couples: a  
1537 nationwide survey. *Ann. Epidemiol.* **16**, 292–298 (2006).
- 1538 129. Pennock-Román, M. Assortative marriage for physical characteristics in newlyweds. *Am. J.*  
1539 *Phys. Anthropol.* **64**, 185–190 (1984).
- 1540 130. Staessen, J. *et al.* Familial aggregation of blood pressure, anthropometric characteristics and  
1541 urinary excretion of sodium and potassium—a population study in two Belgian towns. *J.*  
1542 *Chronic Dis.* **38**, 397–407 (1985).
- 1543 131. Katzmarzyk, P. T., Hebebrand, J. & Bouchard, C. Spousal resemblance in the Canadian  
1544 population: implications for the obesity epidemic. *Int. J. Obes.* **26**, 241–246 (2002).

- 1545 132. Wu, D.-M. *et al.* Familial resemblance of adiposity-related parameters: results from a health  
1546 check-up population in Taiwan. *Eur. J. Epidemiol.* **18**, 221–226 (2003).
- 1547 133. Zahra, J., Jago, R. & Sebire, S. J. Associations between parenting partners' objectively-  
1548 assessed physical activity and Body Mass Index: A cross-sectional study. *Prev. Med. Rep.*  
1549 **2**, 473–477 (2015).
- 1550 134. Longini Jr, I. M., Higgins, M. W., Hinton, P. C., Moll, P. P. & Keller, J. B. Genetic and  
1551 environmental sources of familial aggregation of body mass in Tecumseh, Michigan. *Hum.*  
1552 *Biol.* 733–757 (1984).
- 1553 135. Tambs, K. *et al.* Genetic and environmental contributions to the variance of the body mass  
1554 index in a Norwegian sample of first- and second-degree relatives. *Am. J. Hum. Biol.* **3**,  
1555 257–267 (1991).
- 1556 136. Knuiman, M. W., Divitini, M. L., Bartholomew, H. C. & Welborn, T. A. Spouse  
1557 correlations in cardiovascular risk factors and the effect of marriage duration. *Am. J.*  
1558 *Epidemiol.* **143**, 48–53 (1996).
- 1559 137. Jee, S. H., Suh, I., Won, S. Y. & Kim, M. Y. Familial correlation and heritability for  
1560 cardiovascular risk factors. *Yonsei Med. J.* **43**, 160–164 (2002).
- 1561 138. Davillas, A. & Pudney, S. Concordance of health states in couples: analysis of self-  
1562 reported, nurse administered and blood-based biomarker data in the UK Understanding  
1563 Society panel. *J. Health Econ.* **56**, 87–102 (2017).
- 1564 139. Moll, P. P., Burns, T. L. & Lauer, R. M. The genetic and environmental sources of body  
1565 mass index variability: the Muscatine Ponderosity Family Study. *Am. J. Hum. Genet.* **49**,  
1566 1243 (1991).

- 1567 140. van Dongen, J., Willemsen, G., Chen, W.-M., de Geus, E. J. C. & Boomsma, D. I.  
1568 Heritability of metabolic syndrome traits in a large population-based sample[S]. *J. Lipid*  
1569 *Res.* **54**, 2914–2923 (2013).
- 1570 141. Prichard, I. *et al.* Brides and young couples: partners' weight, weight change, and  
1571 perceptions of attractiveness. *J. Soc. Pers. Relatsh.* **32**, 263–278 (2015).
- 1572 142. Province, M. A. & Rao, D. C. Path analysis of family resemblance with temporal trends:  
1573 applications to height, weight, and Quetelet index in northeastern Brazil. *Am. J. Hum.*  
1574 *Genet.* **37**, 178 (1985).
- 1575 143. Chien, K. L. *et al.* Familial aggregation of metabolic syndrome among the Chinese: Report  
1576 from the Chin-Shan community family study. *Diabetes Res. Clin. Pract.* **76**, 418–424  
1577 (2007).
- 1578 144. Knight, B. *et al.* Evidence of genetic regulation of fetal longitudinal growth. *Early Hum.*  
1579 *Dev.* **81**, 823–831 (2005).
- 1580 145. Bouchard, C., Perusse, L., Leblanc, C., Tremblay, A. & Theriault, G. Inheritance of the  
1581 amount and distribution of human body fat. *Int. J. Obes.* **12**, 205–215 (1988).
- 1582 146. Friedlander, Y., Kark, J. D., Kaufmann, N. A., Berry, E. M. & Stein, Y. Familial  
1583 aggregation of body mass index in ethnically diverse families in Jerusalem. The Jerusalem  
1584 Lipid Research Clinic. *Int. J. Obes.* **12**, 237–247 (1988).
- 1585 147. Silverman-Retana, O. *et al.* Spousal concordance in pathophysiological markers and risk  
1586 factors for type 2 diabetes: a cross-sectional analysis of The Maastricht Study. *BMJ Open*  
1587 *Diabetes Res. Care* **9**, e001879 (2021).
- 1588 148. Sear, R. & Marlowe, F. W. How universal are human mate choices? Size does not matter  
1589 when Hadza foragers are choosing a mate. *Biol. Lett.* **5**, 606–609 (2009).

- 1590 149. Silventoinen, K., Kaprio, J., Lahelma, E., Viken, R. J. & Rose, R. J. Assortative mating by  
1591 body height and BMI: Finnish twins and their spouses. *Am. J. Hum. Biol.* **15**, 620–627  
1592 (2003).
- 1593 150. Mueller, W. H. & Malina, R. M. Differential contribution of stature phenotypes to  
1594 assortative mating in parents of Philadelphia black and white school children. *Am. J. Phys.*  
1595 *Anthropol.* **45**, 269–276 (1976).
- 1596 151. Heude, B. *et al.* Anthropometric relationships between parents and children throughout  
1597 childhood: the Fleurbaix–Laventie Ville Santé Study. *Int. J. Obes.* **29**, 1222–1229 (2005).
- 1598 152. Sanchez-Andres, A. & Mesa, M. Assortative mating in a Spanish population: effects of  
1599 social factors and cohabitation time. *J. Biosoc. Sci.* **26**, 441–50 (1994).
- 1600 153. Salces, I., Rebato, E. & Susanne, C. Evidence of phenotypic and social assortative mating  
1601 for anthropometric and physiological traits in couples from the Basque country (Spain). *J.*  
1602 *Biosoc. Sci.* **36**, 235–250 (2004).
- 1603 154. Ahmad, M. & Gilbert, R. I. Assortative mating for height in Pakistani arranged marriages.  
1604 *J. Biosoc. Sci.* **17**, 211–214 (1985).
- 1605 155. Ajala, O. *et al.* The relationship of height and body fat to gender-assortative weight gain in  
1606 children. A longitudinal cohort study (EarlyBird 44). *Int. J. Pediatr. Obes.* **6**, 223–228  
1607 (2011).
- 1608 156. Annett, J. L., Sing, C. F., Biron, P. & Mongeau, J. G. Familial aggregation of blood  
1609 pressure and weight in adoptive families: III. analysis of the role of shared genes and shared  
1610 household environment in explaining family resemblance for height, weight and selected  
1611 weight/height indices. *Am. J. Epidemiol.* **117**, 492–506 (1983).



- 1612 157. Burgess, E. W. & Wallin, P. Homogamy in personality characteristics. *J. Abnorm. Soc.*  
1613 *Psychol.* **39**, 475 (1944).
- 1614 158. Byard, P. J., Poosha, D. V. R. & Satyanarayana, M. Genetic and environmental  
1615 determinants of height and weight in families from Andhra Pradesh, India. *Hum. Biol.* 621–  
1616 633 (1985).
- 1617 159. Byard, P. J., Mukherjee, B. N., Bhattacharya, S. K., Russell, J. M. & Rao, D. C. Familial  
1618 aggregation of blood pressure and anthropometric variables in patrilocal households. *Am. J.*  
1619 *Phys. Anthropol.* **79**, 305–311 (1989).
- 1620 160. Dasgupta, I., Dasgupta, P. & Daschadhuri, A. B. Familial resemblance in height and  
1621 weight in an endogamous Hahisya caste population of rural West Bengal. *Am. J. Hum. Biol.*  
1622 *Off. J. Hum. Biol. Assoc.* **9**, 7–9 (1997).
- 1623 161. Eckman, R. E., Williams, R. & Nagoshi, C. Marital assortment for genetic similarity. *J.*  
1624 *Biosoc. Sci.* **34**, 511–523 (2002).
- 1625 162. Ellis, J. A. *et al.* Comprehensive multi-stage linkage analyses identify a locus for adult  
1626 height on chromosome 3p in a healthy Caucasian population. *Hum. Genet.* **121**, 213–222  
1627 (2007).
- 1628 163. Ginsburg, E., Livshits, G., Yakovenko, K. & Kobylansky, E. Major gene control of human  
1629 body height, weight and BMI in five ethnically different populations. *Ann. Hum. Genet.* **62**,  
1630 307–322 (1998).
- 1631 164. Harrison, G. A., Gibson, J. B. & Hiorns, R. W. Assortative marriage for psychometric,  
1632 personality and anthropometric variation in a group of Oxfordshire villages. *J. Biosoc. Sci.*  
1633 **8**, 145–153 (1976).

- 1634 165. Knuiman, M. W., Divitini, M. L. & Bartholomew, H. C. Spouse selection and  
1635 environmental effects on spouse correlation in lung function measures. *Ann. Epidemiol.* **15**,  
1636 39–43 (2005).
- 1637 166. Luo, Z. C., Albertsson-Wikland, K. & Karlberg, J. Target height as predicted by parental  
1638 heights in a population-based study. *Pediatr. Res.* **44**, 563–571 (1998).
- 1639 167. Mascie-Taylor, C. G. N. Assortative mating in a contemporary British population. *Ann.*  
1640 *Hum. Biol.* **14**, 59–68 (1987).
- 1641 168. McManus, I. C. & Mascie-Taylor, C. G. Human assortative mating for height: non-linearity  
1642 and heteroscedasticity. *Hum. Biol.* **56**, 617–623 (1984).
- 1643 169. Mukhopadhyay, N. *et al.* A genome-wide scan for loci affecting normal adult height in the  
1644 Framingham Heart Study. *Hum. Hered.* **55**, 191–201 (2003).
- 1645 170. Nagoshi, C. T. & Johnson, R. C. Between- vs. within-family analyses of the correlation of  
1646 height and intelligence. *Soc. Biol.* **34**, 110–113 (1987).
- 1647 171. Nance, W. E., Corey, L. A. & Eaves, L. J. A model for the analysis of mate selection in the  
1648 marriages of twins application to data on stature. *Acta Genet. Medicae Gemellol. Twin Res.*  
1649 **29**, 91–101 (1980).
- 1650 172. Pearson, K. & Lee, A. On the laws of inheritance in man: I. Inheritance of physical  
1651 characters. *Biometrika* **2**, 357–462 (1903).
- 1652 173. Pieper, U. Assortative mating in the population of a German and a Cameroon city. *J. Hum.*  
1653 *Evol.* **10**, 643–645 (1981).
- 1654 174. Pomerat, C. M. Homogamy and infertility. *Hum. Biol.* **8**, 19 (1936).
- 1655 175. Raychaudhuri, A., Ghosh, R., Vasulu, T. S. & Bharati, P. Heritability estimates of height  
1656 and weight in Mahishya caste population. *Int. J. Hum. Genet.* **3**, 151–154 (2003).

- 1657 176. Roberts, D. F., Billewicz, W. Z. & McGregor, I. Heritability of stature in a West African  
1658 population. *Ann. Hum. Genet.* **42**, 15–24 (1978).
- 1659 177. Seki, M., Ihara, Y. & Aoki, K. Homogamy and imprinting-like effect on mate choice  
1660 preference for body height in the current Japanese population. *Ann. Hum. Biol.* **39**, 28–35  
1661 (2012).
- 1662 178. Siniarska, A. Assortative mating of parents and sib-sib similarities in offspring. *Stud Hum*  
1663 *Ecol* **5**, 95–112 (1984).
- 1664 179. Smith, M. A research note on homogamy of marriage partners in selected physical  
1665 characteristics. *Am. Sociol. Rev.* **11**, (1946).
- 1666 180. Stulp, G., Buunk, A. P. & Pollet, T. V. Women want taller men more than men want shorter  
1667 women. *Personal. Individ. Differ.* **54**, 877–883 (2013).
- 1668 181. Stulp, G., Buunk, A. P., Pollet, T. V., Nettle, D. & Verhulst, S. Are human mating  
1669 preferences with respect to height reflected in actual pairings? *PLoS One* **8**, e54186 (2013).
- 1670 182. Stulp, G., Mills, M., Pollet, T. V. & Barrett, L. Non-linear associations between stature and  
1671 mate choice characteristics for American men and their spouses. *Am. J. Hum. Biol.* **26**, 530–  
1672 537 (2014).
- 1673 183. Susanne, C. Heritability of anthropological characters. *Hum. Biol.* 573–580 (1977).
- 1674 184. Tambs, K. *et al.* Genetic and environmental contributions to the variance of body height in  
1675 a sample of first and second degree relatives. *Am. J. Phys. Anthropol.* **88**, 285–294 (1992).
- 1676 185. Tenesa, A., Rawlik, K., Navarro, P. & Canela-Xandri, O. Genetic determination of height-  
1677 mediated mate choice. *Genome Biol.* **16**, 1–8 (2015).
- 1678 186. To, W. W. K., Cheung, W. & Kwok, J. S. Y. Paternal height and weight as determinants of  
1679 birth weight in a Chinese population. *Am. J. Perinatol.* **15**, 545–548 (1998).

- 1680 187. Willoughby, R. R. Somatic homogamy in man. *Hum. Biol.* **5**, 690 (1933).
- 1681 188. Xu, J. *et al.* Major recessive gene(s) with considerable residual polygenic effect regulating  
1682 adult height: confirmation of genomewide scan results for chromosomes 6, 9, and 12. *Am.*  
1683 *J. Hum. Genet.* **71**, 646–650 (2002).
- 1684 189. Stulp, G., Simons, M. J. P., Grasman, S. & Pollet, T. V. Assortative mating for human  
1685 height: a meta-analysis. *Am. J. Hum. Biol.* **29**, e22917 (2017).
- 1686 190. Donahue, R. P., Prineas, R. J., Gomez, O. & Hong, C. P. Familial resemblance of body fat  
1687 distribution: the Minneapolis Children’s Blood Pressure Study. *Int. J. Obes. Relat. Metab.*  
1688 *Disord. J. Int. Assoc. Study Obes.* **16**, 161–167 (1992).
- 1689 191. Hippisley-Cox, J. Married couples’ risk of same disease: cross sectional study. *BMJ* **325**,  
1690 636–636 (2002).
- 1691 192. McLeod, J. D. Spouse concordance for depressive disorders in a community sample. *J.*  
1692 *Affect. Disord.* **27**, 43–52 (1993).
- 1693 193. Al-Sharbatti, S. S., Abed, Y. I., Al-Heety, L. M. & Basha, S. A. Spousal concordance of  
1694 diabetes mellitus among women in Ajman, United Arab Emirates. *Sultan Qaboos Univ.*  
1695 *Med. J.* **16**, e197 (2016).
- 1696 194. Sun, J. *et al.* Prevalence of diabetes and cardiometabolic disorders in spouses of diabetic  
1697 individuals. *Am. J. Epidemiol.* **184**, 400–409 (2016).
- 1698 195. Patel, S. A. *et al.* Chronic disease concordance within Indian households: a cross-sectional  
1699 study. *PLoS Med.* **14**, e1002395 (2017).
- 1700 196. Jun, S. Y., Kang, M., Kang, S. Y., Lee, J. A. & Kim, Y. S. Spousal Concordance regarding  
1701 Lifestyle Factors and Chronic Diseases among Couples Visiting Primary Care Providers in  
1702 Korea. *Korean J. Fam. Med.* **41**, 183–188 (2020).

- 1703 197. Watanabe, T., Sugiyama, T., Takahashi, H., Noguchi, H. & Tamiya, N. Concordance of  
1704 hypertension, diabetes and dyslipidaemia in married couples: cross-sectional study using  
1705 nationwide survey data in Japan. *BMJ Open* **10**, e036281 (2020).
- 1706 198. Tama, B. A., Rodiyatul F. S., R. F. S. & Hermansyah, H. An early detection method of  
1707 type-2 diabetes mellitus in public hospital. *TELKOMNIKA Telecommun. Comput. Electron.*  
1708 *Control* **9**, 287 (2011).
- 1709 199. McLeod, J. D. Social and psychological bases of homogamy for common psychiatric  
1710 disorders. *J. Marriage Fam.* 201–214 (1995).  
1711
